# Supplementary material for: Silver-promoted regioselective [4+2] annulation reaction of indoles with alkenes to construct dihydropyrimidoindolone scaffolds
Source: Royal Society of Chemistry journal article supplement (doi:10.1039/c9cc07098b), 2019-01-01
Supplement: c9cc07098b1.pdf [file c9cc07098b1.pdf]

# Silver-Promoted Regioselective [4+2] Annulation Reaction of Indoles with Alkenes to Construct Dihydropyrimidoindolone Scaffolds

## Contents

|                                                                   |     |
|-------------------------------------------------------------------|-----|
| Molecular structure and crystallographic data of <b>3af</b> ..... | 2   |
| General methods.....                                              | 3   |
| Preparation of the starting materials.....                        | 3   |
| General procedure for the synthesis of compounds <b>3</b> .....   | 4   |
| Optimization of reaction conditions .....                         | 5   |
| Control experiments .....                                         | 8   |
| Kinetic Isotope Effect (KIE) Study .....                          | 8   |
| Transformation of product <b>3aa</b> .....                        | 10  |
| Hammett-plot correlation study.....                               | 10  |
| DFT calculation.....                                              | 11  |
| Scope for other electron-rich aromatic .....                      | 27  |
| Characterization of products .....                                | 27  |
| References .....                                                  | 134 |

## Molecular structure and crystallographic data of **3af**

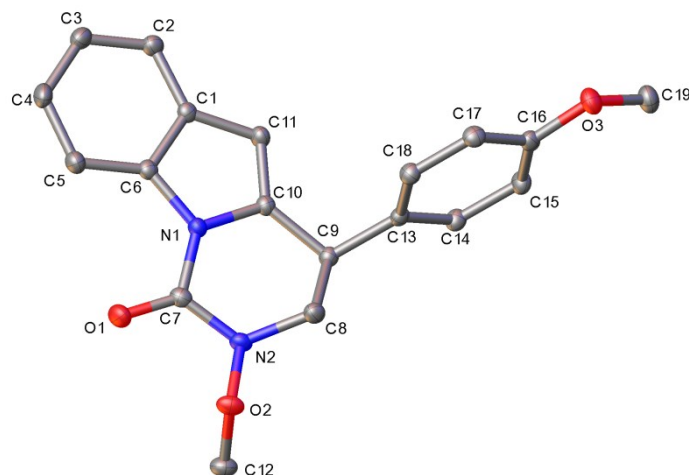

**Figure S1.** X-ray crystal structure of **3af**

**Table S1.** Crystal data and structure refinement for **3af**

|                                 |                                                                                                              |
|---------------------------------|--------------------------------------------------------------------------------------------------------------|
| Empirical formula               | C <sub>19</sub> H <sub>18</sub> N <sub>2</sub> O <sub>3</sub>                                                |
| CCDC number                     | 1841255                                                                                                      |
| Formula weight                  | 322.35                                                                                                       |
| Temperature                     | 173.15 K                                                                                                     |
| Wavelength                      | 0.71073 Å                                                                                                    |
| Crystal system                  | Monoclinic                                                                                                   |
| Space group                     | P 1 21/c 1                                                                                                   |
| Unit cell dimensions            | a = 11.350(3) Å $\alpha$ = 90°.<br>b = 13.447(4) Å $\beta$ = 108.139(4)°.<br>c = 10.912(3) Å $\gamma$ = 90°. |
| Volume                          | 1582.6(8) Å <sup>3</sup>                                                                                     |
| Z                               | 4                                                                                                            |
| Density (calculated)            | 1.353 Mg/m <sup>3</sup>                                                                                      |
| Absorption coefficient          | 0.093 mm <sup>-1</sup>                                                                                       |
| F(000)                          | 680                                                                                                          |
| Crystal size                    | 0.455 x 0.408 x 0.264 mm <sup>3</sup>                                                                        |
| Theta range for data collection | 1.888 to 27.468°                                                                                             |

|                                   |                                             |
|-----------------------------------|---------------------------------------------|
| Index ranges                      | -14<=h<=13, -17<=k<=17, -13<=l<=14          |
| Reflections collected             | 10516                                       |
| Independent reflections           | 3590 [R(int) = 0.0385]                      |
| Completeness to theta = 25.242°   | 99.0 %                                      |
| Absorption correction             | Semi-empirical from equivalents             |
| Max. and min. transmission        | 1.00000 and 0.77874                         |
| Refinement method                 | Full-matrix least-squares on F <sup>2</sup> |
| Data / restraints / parameters    | 3590 / 0 / 219                              |
| Goodness-of-fit on F <sup>2</sup> | 1.104                                       |
| Final R indices [I>2sigma(I)]     | R1 = 0.0474, wR2 = 0.1026                   |
| R indices (all data)              | R1 = 0.0505, wR2 = 0.1050                   |
| Extinction coefficient            | n/a                                         |
| Largest diff. peak and hole       | 0.255 and -0.164 e.Å <sup>-3</sup>          |

## General methods

Unless noted, all commercial reagents and solvents were used without further purification. Melting points were recorded on a RY-1 microscopic melting apparatus and uncorrected. NMR spectra were recorded in CDCl<sub>3</sub> on 400 MHz or 500 MHz spectrometers. <sup>1</sup>H NMR chemical shifts ( $\delta$ ) are reported in parts per million relative to tetramethylsilane (0 ppm) or residual CHCl<sub>3</sub> (7.26 ppm). <sup>13</sup>C NMR chemical shifts are reported relative to the center line signal of the CDCl<sub>3</sub> triplet at 77.0 ppm. The following abbreviations are used for multiplicities: s = singlet, d = doublet, t = triplet, q = quartet, dd = doublet of doublets, and m = multiplet. Mass spectra were obtained on an Ultima Global spectrometer with an ESI source. The X-ray single-crystal diffraction was performed on Saturn 724+ instrument. Silica gel (200–300 mesh) for column chromatography and silica GF254 for TLC were produced by Qingdao Marine Chemical Company (China).

## Preparation of the starting materials

### Preparation of substrates 1

The *N*-methoxy-1*H*-indole-1-carboxamides **1** were prepared according to previously

described methods.<sup>[1]</sup>

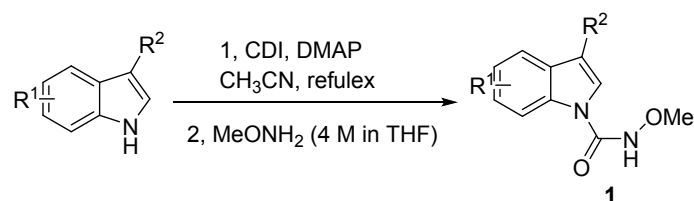

**Preparation of MeONH<sub>2</sub> solution:** To a 100 mL round bottle charged with a stirring bar was added MeONH<sub>2</sub>·HCl (80.0 mmol) and 20 mL THF. To the system was then added sodium hydroxide (powder, 1.0 equiv). The system was then stirred at room temperature for about 3 h until the system became clear.

**Preparation of *N*-methoxy-1*H*-indole-1-carboxamides:** To a 100 mL round bottle charged with stirring bar, was added indole (5.0 mmol, 1.0 equiv), **1**, 1'-carbonyldiimidazole (CDI, 7.5 mmol, 1.5 equiv) and 4-dimethylaminepyridine (DMAP, 5.0 mol%). Then 20 mL anhydrous acetonitrile was added to the bottle under the protection of nitrogen. The system was refluxed at 85 °C for 10 h. After cooled to room temperature, MeONH<sub>2</sub> solution (4 M in THF, 2 equiv) was added and then stirred at 80 °C for another 6 h (when most of indole was consumed as detected by TLC). After cooled to room temperature, the solvents were removed under reduced pressure. The residue was purified by silica chromatography to afford the corresponding *N*-methoxy-1*H*-indole-1-carboxamides **1a-1s**.

### General procedure for the synthesis of compounds **3**

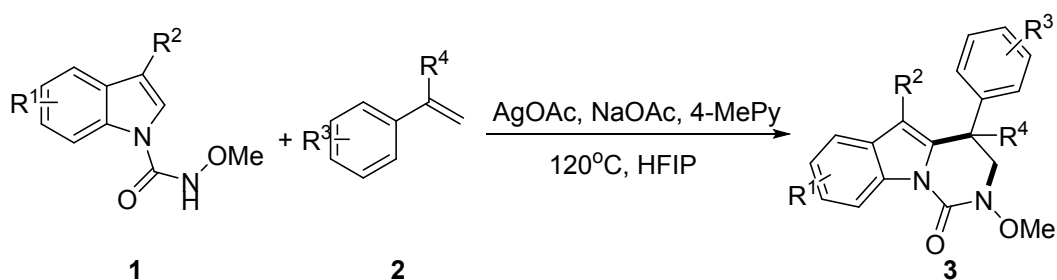

To a solution of *N*-methoxy-1*H*-indole-1-carboxamides **1** (0.2 mmol), AgOAc (0.4 mmol, 2.0 equiv), NaOAc (0.4 mmol, 2.0 equiv), and 4-Methylpyridine (0.8 mmol, 4.0 equiv) in HFIP (2 mL) was added olefins **2** (0.4 mmol, 2.0 equiv). The reaction mixture was stirred at 120 °C for 4 h, and cooled to room temperature. The resulting mixture was diluted with 25 mL of CH<sub>2</sub>Cl<sub>2</sub>, and filtered through a celite pad. Evaporation of the solvent followed by purification on silica gel, provided products **3**.

## Optimization of reaction conditions

Ag salt<sup>a</sup>

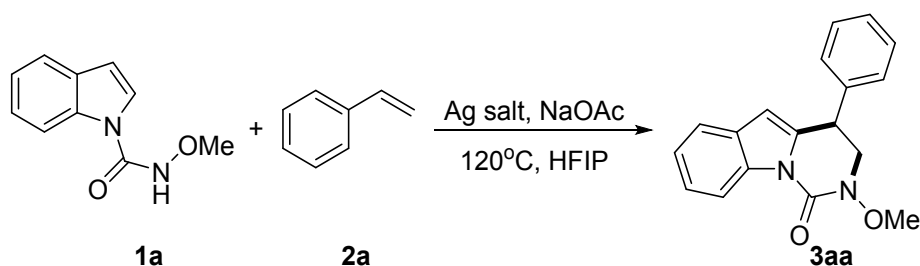

| Entry    | Ag salt                         | Yield <sup>b</sup> |
|----------|---------------------------------|--------------------|
| <b>1</b> | <b>AgOAc</b>                    | <b>64%</b>         |
| 2        | AgNO <sub>3</sub>               | 60%                |
| 3        | AgOPiv                          | 59%                |
| 4        | Ag <sub>2</sub> CO <sub>3</sub> | 50%                |
| 5        | Ag <sub>2</sub> O               | 49%                |
| 6        | AgTFA                           | 22%                |
| 7        | AgOTf                           | 42%                |
| 8        | AgSbF <sub>6</sub>              | 38%                |
| 9        | none                            | n.p                |

<sup>a</sup>Conditions: 0.2 mmol of **1a**, 0.4 mmol of **2a**, Ag salt (0.4 mmol, 2.0 equiv), NaOAc (0.4 mmol, 2.0 equiv), air, HFIP (2 mL), 120 °C, 4 h. <sup>b</sup>Isolated yields. n. p = no product.

Base<sup>a</sup>

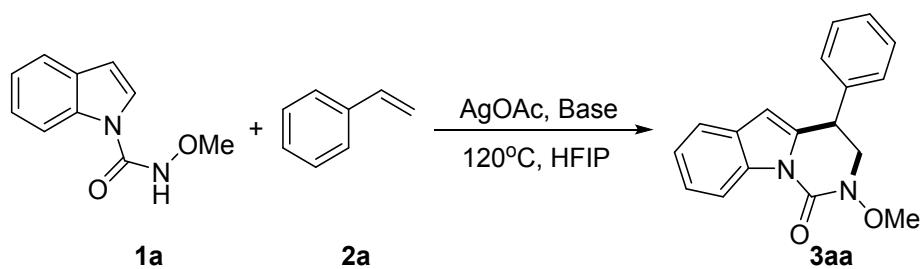

| Entry    | Base                            | Yield <sup>b</sup> |
|----------|---------------------------------|--------------------|
| 1        | NaOPiv·H <sub>2</sub> O         | 35%                |
| 2        | Na <sub>2</sub> CO <sub>3</sub> | 41%                |
| 3        | K <sub>2</sub> CO <sub>3</sub>  | 38%                |
| 4        | Cs <sub>2</sub> CO <sub>3</sub> | 36%                |
| <b>5</b> | <b>NaOAc</b>                    | <b>64%</b>         |
| 6        | KOAc                            | 60%                |
| 7        | CsOAc                           | 43%                |
| 8        | DIPEA                           | 53%                |
| 9        | DABCO                           | 19%                |
| 10       | TEA                             | 25%                |

<sup>a</sup>Conditions: 0.2 mmol of **1a**, 0.4 mmol of **2a**, AgOAc (0.4 mmol, 2.0 equiv), Base (0.4 mmol, 2.0 equiv), air, HFIP (2 mL),  $120^\circ\text{C}$ , 4 h. <sup>b</sup>Isolated yields.

Solvent<sup>a</sup>

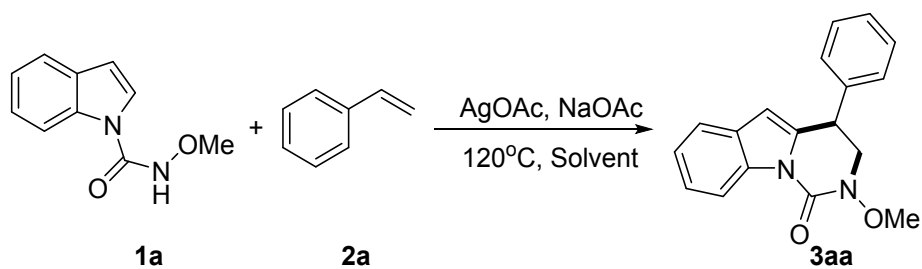

| Entry    | Solvent     | Yield <sup>b</sup> |
|----------|-------------|--------------------|
| <b>1</b> | <b>HFIP</b> | <b>64%</b>         |
| 2        | TFE         | 52%                |
| 3        | MeOH        | trace              |
| 4        | DCE         | trace              |
| 5        | Dioxane     | trace              |

<sup>a</sup>Conditions: 0.2 mmol of **1a**, 0.4 mmol of **2a**, AgOAc (0.4 mmol, 2.0 equiv), NaOAc

(0.4 mmol, 2.0 equiv), air, Solvent (2 mL), 120 °C, 4 h. <sup>b</sup>Isolated yields.

Temperature<sup>a</sup>

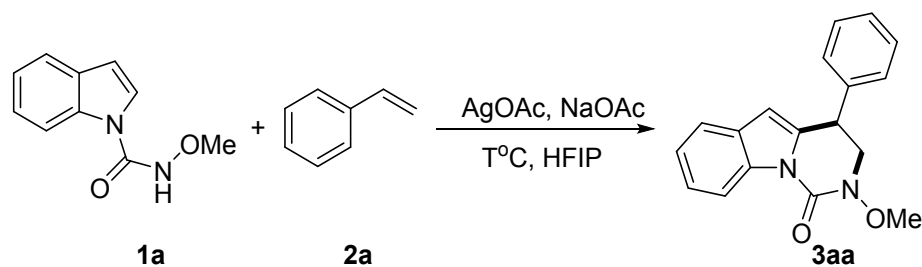

| Entry    | Temp/°C    | Yield <sup>b</sup> |
|----------|------------|--------------------|
| 1        | 60         | n.p                |
| 2        | 80         | 45%                |
| 3        | 100        | 48%                |
| <b>4</b> | <b>120</b> | <b>64%</b>         |
| 5        | 140        | 32%                |

<sup>a</sup>Conditions: 0.2 mmol of **1a**, 0.4 mmol of **2a**, AgOAc (0.4 mmol, 2.0 equiv), NaOAc (0.4 mmol, 2.0 equiv), air, HFIP (2 mL), T °C, 4 h. <sup>b</sup>Isolated yields. n. p = no product.

Additive<sup>a</sup>

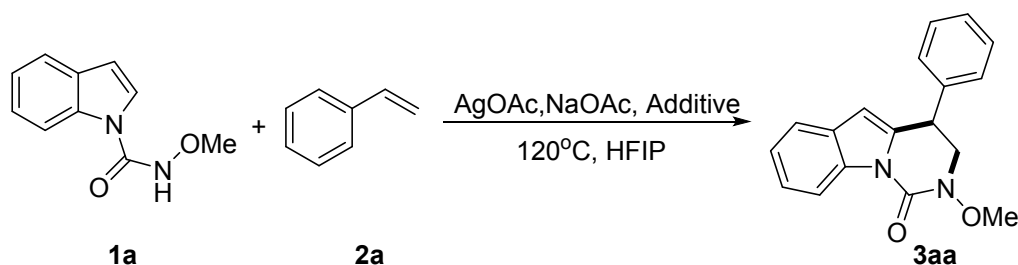

| Entry          | Additive                | Yield <sup>b</sup> |
|----------------|-------------------------|--------------------|
| 1              | Pyridine                | 78%                |
| 2              | 2-Chloropyridine        | 72%                |
| <b>3</b>       | <b>4-Methylpyridine</b> | <b>85%</b>         |
| 4              | 2,6-Dimethylpyridine    | 75%                |
| 5 <sup>c</sup> | 4-Methylpyridine        | 19%                |
| 6 <sup>d</sup> | 4-Methylpyridine        | trace              |

<sup>a</sup>Conditions: 0.2 mmol of **1a**, 0.4 mmol of **2a**, AgOAc (0.4 mmol, 2.0 equiv), NaOAc (0.4 mmol, 2.0 equiv), Additive (0.8 mmol, 4.0 equiv), air, HFIP (2 mL), 120 °C, 4 h.

<sup>b</sup>Isolated yields. <sup>c</sup>Condition: AgOAc (20 mol%), K<sub>2</sub>S<sub>2</sub>O<sub>8</sub> (2.0 equiv). <sup>d</sup>Condition: AgOAc (20 mol%), PhI(OAc)<sub>2</sub> (2.0 equiv).

## Control experiments

### TEMPO or BHT inhibiting experiment

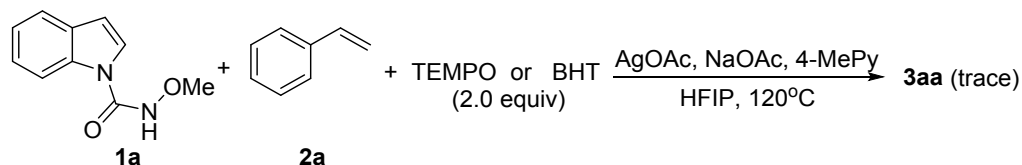

The reaction was carried out according to the general procedure for the synthesis of compounds **3**, and 2 equivalent of TEMPO or BHT (0.4 mmol) was added into the reaction system. At the end of the reaction, the target product **3aa** was generated in a trace yield.

## Kinetic Isotope Effect (KIE) Study

### Intermolecular Kinetic Isotopic Effect

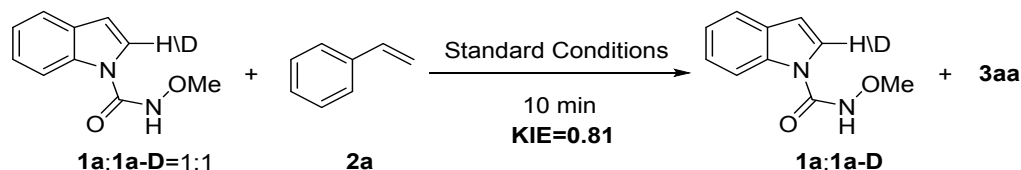

An equimolar mixture of **1a** (0.1 mmol) and **1a-D** (95% D, 0.1 mmol) were allowed to react with **2a** (0.1 mmol) in HFIP (2 mL) in the presence of AgOAc (0.4 mmol), NaOAc (0.4 mmol), and 4-Methylpyridine (0.8 mmol). The mixture was stirred at 120 °C. The reaction was stopped after 10 min, then the starting materials and the product were isolated by using column chromatography on silica gel. A mixture of the starting materials was analyzed by  $^1\text{H}$  NMR spectroscopy. A *Kinetic isotopic effect of this reaction was determined to be  $K_H/K_D = 0.81$  ( $0.46/0.54 \cdot 0.95$ )*





$$K_H/K_D = 0.80.$$

## Transformation of product 3aa

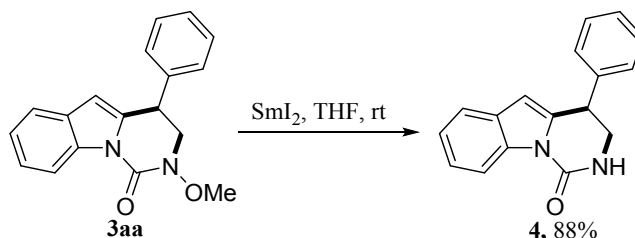

In a flame-dried round-bottom flask, **3aa** (29 mg, 0.1 mmol, 1.0 equiv) was dissolved in dry THF (15 mL). SmI<sub>2</sub>-solution (0.1 M in THF, 3 mL, 3.0 equiv) was added dropwise at room temperature. The reaction was stirred at room temperature for 3 hours under the protection of nitrogen. The solvent was removed under reduced pressure and the residue purified by flash column chromatography to afford the title compound **4** (23 mg) as a white solid in 88% yield.

## Hammett-plot correlation study

To a solution of *N*-methoxy-1*H*-indole-1-carboxamides **1** (0.2 mmol), AgOAc (0.4 mmol, 2.0 equiv), NaOAc (0.4 mmol, 2.0 equiv), and 4-Methylpyridine (0.8 mmol, 4.0 equiv) in HFIP (2 mL) was added olefins **2** (0.4 mmol, 2.0 equiv). The reaction mixture was stirred at 120 °C for 20 min, and cooled to room temperature. Filtered through a celite pad, the solvents were removed under reduced pressure, then add CDCl<sub>3</sub> to the mixture to dissolve the solid. The resulting mixture was analyzed by <sup>19</sup>F NMR for determination of yield using Benzotrifluoride (0.2 mmol) as the internal standard.

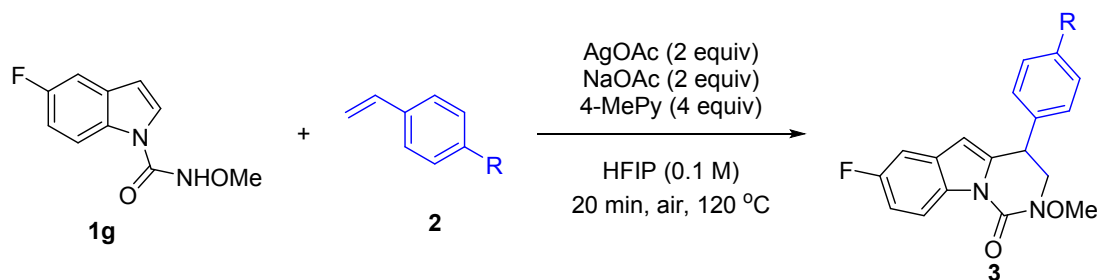

| R             | $\sigma$ | $k_x/k_H$ | $\lg(k_x/k_H)$ |
|---------------|----------|-----------|----------------|
| <i>p</i> -OMe | -0.268   | 0.31394   | -0.50316       |
| <i>p</i> -Me  | -0.170   | 0.51284   | -0.29002       |

|                      |        |         |          |
|----------------------|--------|---------|----------|
| <i>p</i> - <b>Bu</b> | -0.197 | 0.48783 | -0.31173 |
| <b>H</b>             | 0.000  | 1.00000 | 0.00000  |
| <i>p</i> - <b>F</b>  | 0.062  | 0.70957 | -0.14900 |
| <i>p</i> - <b>Cl</b> | 0.227  | 1.07411 | 0.03105  |
| <i>p</i> - <b>Br</b> | 0.232  | 1.03943 | 0.01680  |

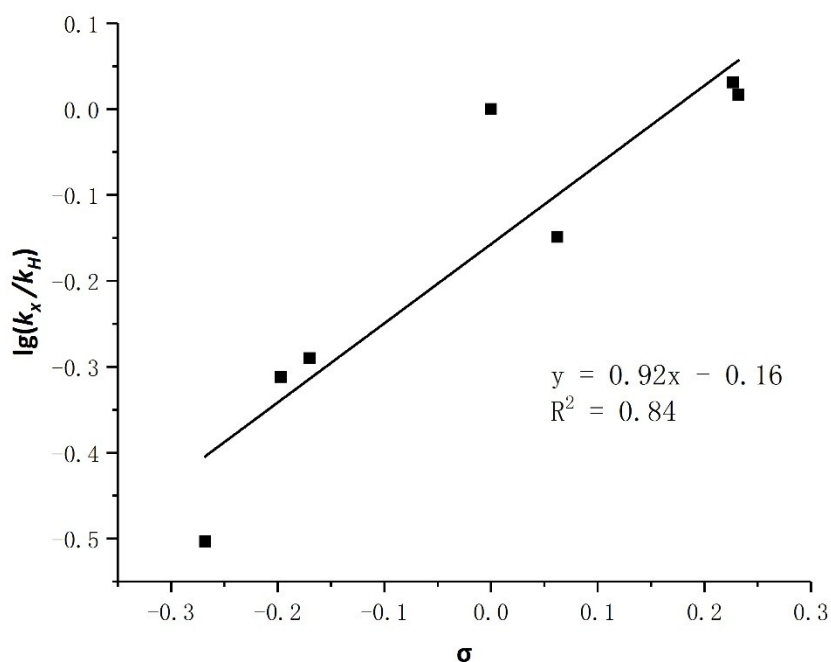

**Figure S2.** Hammett plot correlation of differently *para*-substituted styrene

To further explore the reaction mechanism, the reaction of different *p*-substituted styrene with substrate **1g** was studied. In the Hammett curve,  $\lg(k_x/k_H)$  is linear with  $\sigma$ , and  $\rho = 0.92$  indicates that the reaction is promoted by electron-withdrawing groups.<sup>[2]</sup>

## DFT calculation

### Computational Details

The  $\omega$ B97X-D<sup>i</sup> functional was used for all calculations, which were carried out with the Gaussian 09 program<sup>ii</sup>. Two different basis sets were used. Basis set I was used for geometry optimizations and frequency calculations. The effective core potentials (ECPs) of Hay and Wadt with a double- $\zeta$  valence basis set (LANL2DZ) were employed for Ag,<sup>iii,iv,v,vi</sup> supplemented with polarization shells with the following exponents: Ag ( $f = 1.611$ ),<sup>vii,viii</sup> and the all-electron 6-31G(d) basis set was used in describing all other atoms.<sup>ix,x,xi</sup> Geometric structures of all species in this work were optimized

as gas phase at  $T = 298.15$  K and 1 atm pressure. The harmonic vibrational frequencies and the number of imaginary frequencies determine the nature of all intermediates (no imaginary frequency) and transition state structures (only one imaginary frequency). The latter were also confirmed to connect appropriate intermediates, reactants, or products by intrinsic reaction coordinate (IRC) calculations.<sup>xii,xiii</sup> The gas-phase Gibbs free energies,  $G$ , were calculated within the harmonic potential approximation at optimized structures. Based on the gas phase optimized geometries, the solvation effect of 2,2,2-trifluoroethanol was incorporated with the SMD solvent model at the level of  $\omega$ B97X-D/6-311+G(d,p) theory. The solution phase Gibbs free energy is calculated by adding solvation energies on the gas phase relative Gibbs free energies. The same methodology has been widely used in many recent theoretical works.<sup>xiv</sup>

### Calculation of Gibbs free energy of Ag(s)

The Gibbs free energy of solid Ag was calculated by taking into account available experimental data:

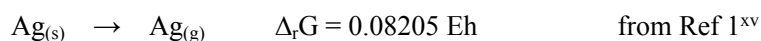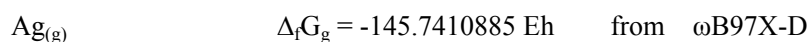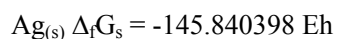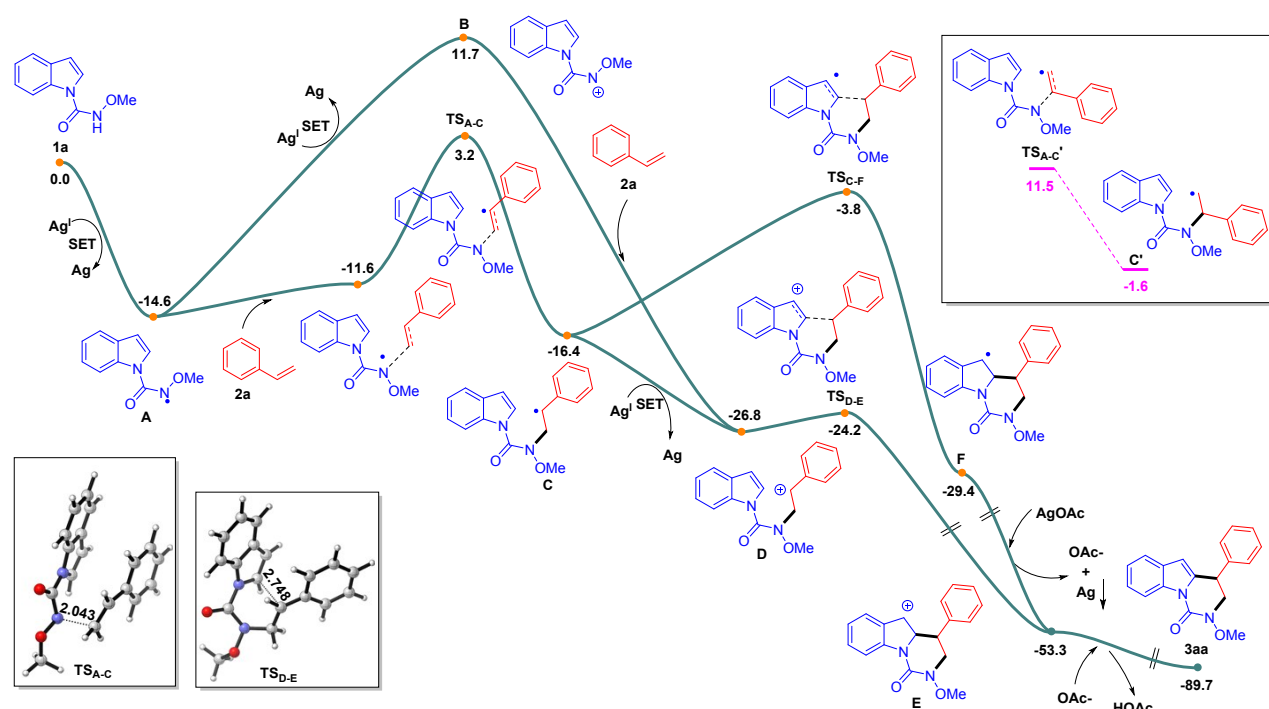

**Figure S3.** Computed free energy profile (in kcal mol<sup>-1</sup>) of this reaction

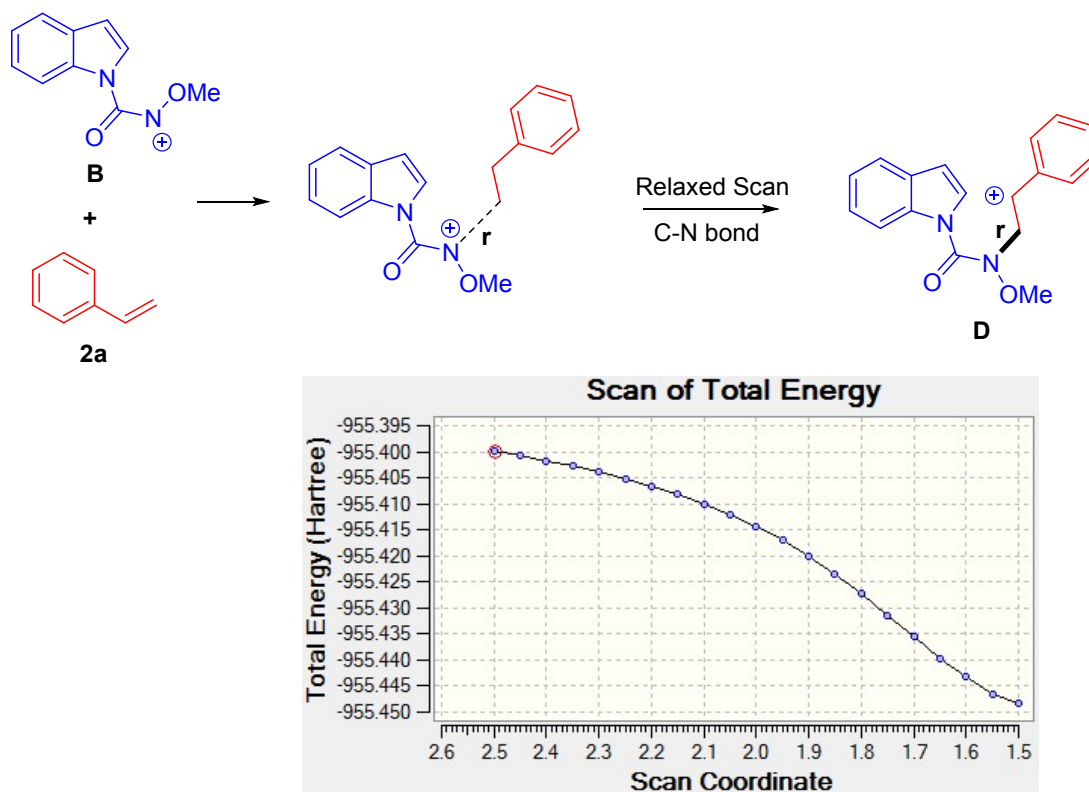

**Figure S4.** The relaxed scan of the cation transfer process with the formation of C-N bond.

### Cartesian Coordinates of all the intermediate and transition states

1a

|   |             |             |             |
|---|-------------|-------------|-------------|
| C | 4.75000400  | 2.00088300  | -0.12069200 |
| C | 4.91338800  | 0.67801300  | 0.32280500  |
| C | 3.87329000  | -0.23871900 | 0.27982300  |
| C | 2.65188000  | 0.21114000  | -0.22422500 |
| C | 2.46705500  | 1.53301000  | -0.67602800 |
| C | 3.53422700  | 2.43715300  | -0.62002800 |
| N | 1.43952800  | -0.46534200 | -0.41109200 |
| C | 0.51547100  | 0.43898100  | -0.94857000 |
| C | 1.10039900  | 1.64727500  | -1.12164900 |
| C | 1.22436400  | -1.82066300 | -0.13254800 |
| O | 1.94560400  | -2.48021600 | 0.57665900  |
| N | 0.04337700  | -2.30016600 | -0.70762700 |
| O | -0.07642700 | -3.68379200 | -0.65879100 |
| C | -0.82594100 | -4.06032800 | 0.48657600  |
| H | 5.58850700  | 2.68882100  | -0.06869200 |
| H | 5.87580800  | 0.36313500  | 0.71480600  |
| H | 3.99190200  | -1.25415300 | 0.63332600  |
| H | 3.40626600  | 3.45947700  | -0.96357400 |

|   |             |             |             |
|---|-------------|-------------|-------------|
| H | -0.51032700 | 0.14100600  | -1.10600000 |
| H | 0.61633500  | 2.53566600  | -1.50214200 |
| H | -0.93426800 | -5.14378300 | 0.40914800  |
| H | -0.28672300 | -3.80829500 | 1.40531100  |
| H | -1.81194400 | -3.58200100 | 0.48400100  |
| H | -0.12204200 | -2.01093100 | -1.66485500 |

A

|   |             |             |             |
|---|-------------|-------------|-------------|
| C | 4.77142400  | 2.12924500  | -0.31126600 |
| C | 5.06474700  | 0.82765200  | 0.12257700  |
| C | 4.08485700  | -0.15348500 | 0.19795900  |
| C | 2.79188500  | 0.21093400  | -0.17817700 |
| C | 2.47684500  | 1.51254800  | -0.61676000 |
| C | 3.48235600  | 2.48091900  | -0.68254000 |
| N | 1.60657400  | -0.53681700 | -0.21335400 |
| C | 0.57469300  | 0.29854100  | -0.66974300 |
| C | 1.06437100  | 1.53284100  | -0.92003400 |
| C | 1.49091800  | -1.87567000 | 0.14553700  |
| O | 2.41644300  | -2.55476700 | 0.53166300  |
| N | 0.15114900  | -2.30846900 | -0.00760100 |
| O | 0.10161800  | -3.58583900 | 0.34542000  |
| C | -1.23019800 | -4.08511300 | 0.21813400  |
| H | 5.56487900  | 2.86913300  | -0.35562000 |
| H | 6.08266800  | 0.57832200  | 0.40671900  |
| H | 4.30564600  | -1.15803400 | 0.53202100  |
| H | 3.25498400  | 3.48840400  | -1.01850000 |
| H | -0.42279200 | -0.09713200 | -0.76926500 |
| H | 0.49490700  | 2.37697600  | -1.28270000 |
| H | -1.17639800 | -5.13057800 | 0.52032800  |
| H | -1.89908000 | -3.52467000 | 0.87572000  |
| H | -1.56072000 | -3.99783800 | -0.81971900 |

B

|   |            |             |             |
|---|------------|-------------|-------------|
| C | 4.77637800 | 2.09203200  | -0.31858200 |
| C | 5.04093700 | 0.83474500  | 0.21643800  |
| C | 4.04293600 | -0.14037300 | 0.30938300  |
| C | 2.77946100 | 0.21749900  | -0.16129900 |
| C | 2.49457900 | 1.48636400  | -0.70443800 |

|   |             |             |             |
|---|-------------|-------------|-------------|
| C | 3.49516400  | 2.43469500  | -0.78706900 |
| N | 1.59427700  | -0.52673900 | -0.20600000 |
| C | 0.56972200  | 0.28287000  | -0.77507200 |
| C | 1.08634400  | 1.48654500  | -1.07925800 |
| C | 1.51563700  | -1.82356300 | 0.23802800  |
| O | 2.38815800  | -2.49826500 | 0.72059400  |
| N | 0.16298800  | -2.27555800 | 0.02272400  |
| O | 0.07108000  | -3.46380800 | 0.39671300  |
| C | -1.24964300 | -4.07255900 | 0.23974300  |
| H | 5.57308500  | 2.82605200  | -0.37534400 |
| H | 6.03870100  | 0.60143900  | 0.57095400  |
| H | 4.24201900  | -1.11786500 | 0.72655900  |
| H | 3.30464500  | 3.41847700  | -1.20242600 |
| H | -0.42615300 | -0.10803000 | -0.89844200 |
| H | 0.54236400  | 2.30745000  | -1.52504900 |
| H | -1.10311700 | -4.89122800 | -0.46596700 |
| H | -1.50053900 | -4.45448500 | 1.22938600  |
| H | -1.94724700 | -3.31859400 | -0.12078000 |

C

|   |             |             |             |
|---|-------------|-------------|-------------|
| C | -3.28518300 | -1.83101400 | -0.01559300 |
| C | -2.33644700 | -2.38266800 | 0.85835100  |
| C | -0.97535400 | -2.16520100 | 0.68624500  |
| C | -0.59183400 | -1.36831100 | -0.39235300 |
| C | -1.52944500 | -0.80431800 | -1.27981700 |
| C | -2.89156700 | -1.04306400 | -1.08655600 |
| N | 0.67794500  | -0.95247200 | -0.81168100 |
| C | 0.51999600  | -0.13597600 | -1.94222200 |
| C | -0.79090500 | -0.03301400 | -2.25086700 |
| C | 1.86839600  | -1.22334000 | -0.14969200 |
| O | 1.95043100  | -1.91761300 | 0.84036400  |
| N | 2.94781100  | -0.57767200 | -0.79940400 |
| O | 4.03953300  | -0.80368200 | -0.07987100 |
| C | 5.16685900  | -0.16818100 | -0.68162100 |
| H | -4.34072100 | -2.02409200 | 0.15170500  |
| H | -2.67043000 | -2.99902500 | 1.68783600  |
| H | -0.23944900 | -2.58964100 | 1.35542500  |
| H | -3.62560200 | -0.60878900 | -1.75864600 |
| H | 1.38911000  | 0.29692200  | -2.40914800 |
| H | -1.20543000 | 0.53798500  | -3.06930000 |
| H | 6.00993100  | -0.39730100 | -0.03023400 |

|   |             |             |             |
|---|-------------|-------------|-------------|
| H | 5.33023100  | -0.57418800 | -1.68294700 |
| H | 4.99877400  | 0.91034100  | -0.73402800 |
| C | -2.95088800 | 2.57173800  | 0.13969400  |
| C | -2.90348200 | 1.61390800  | 1.14823600  |
| C | -1.67743600 | 1.17246900  | 1.63098700  |
| C | -0.47626300 | 1.68004600  | 1.12236300  |
| C | -0.53880500 | 2.63666000  | 0.10212600  |
| C | -1.76301100 | 3.08064100  | -0.38177900 |
| H | -3.90672900 | 2.91435700  | -0.24611900 |
| H | -3.82115700 | 1.19499800  | 1.54951700  |
| H | -1.64650600 | 0.40730100  | 2.40148700  |
| H | 0.37841000  | 3.01756600  | -0.33744000 |
| H | -1.79083100 | 3.81989300  | -1.17725300 |
| C | 0.79891700  | 1.16181700  | 1.64987700  |
| C | 2.00982000  | 1.70158600  | 1.49290300  |
| H | 0.71935900  | 0.23006600  | 2.20878800  |
| H | 2.88851800  | 1.21562400  | 1.90524800  |
| H | 2.16962200  | 2.63749400  | 0.96357400  |

TSC-D

|   |             |             |             |
|---|-------------|-------------|-------------|
| C | -3.31989600 | -2.26244400 | 0.10368600  |
| C | -2.30448100 | -2.80171300 | 0.91099900  |
| C | -0.97090500 | -2.46701400 | 0.71969700  |
| C | -0.68283100 | -1.56210200 | -0.30277800 |
| C | -1.68618400 | -1.00865900 | -1.12317400 |
| C | -3.02068400 | -1.37252900 | -0.91568200 |
| N | 0.53104300  | -0.98301800 | -0.68423100 |
| C | 0.27832400  | -0.08658400 | -1.72721200 |
| C | -1.04186500 | -0.08603700 | -2.02417400 |
| C | 1.75991300  | -1.20376500 | -0.05829600 |
| O | 1.98155400  | -2.16258000 | 0.64520700  |
| N | 2.65520500  | -0.14649500 | -0.34734400 |
| O | 3.90505200  | -0.56810900 | 0.01987800  |
| C | 4.86993000  | 0.30160600  | -0.54239700 |
| H | -4.35178900 | -2.55110100 | 0.28089200  |
| H | -2.56560200 | -3.50398300 | 1.69704000  |
| H | -0.18055200 | -2.89025200 | 1.32598100  |
| H | -3.80659000 | -0.95130500 | -1.53599300 |
| H | 1.09885300  | 0.46644300  | -2.15474200 |
| H | -1.51952700 | 0.51238700  | -2.78660900 |
| H | 5.83743300  | -0.14985200 | -0.31770500 |



|   |             |            |             |
|---|-------------|------------|-------------|
| H | 4.73098100  | 0.38684900 | -1.62481000 |
| H | 4.81413100  | 1.29835300 | -0.08732100 |
| C | -2.59586100 | 2.92237100 | -0.11228600 |
| C | -2.72048700 | 1.83854000 | 0.75356200  |
| C | -1.58813300 | 1.24852800 | 1.29671600  |
| C | -0.30176800 | 1.72119800 | 0.97922200  |
| C | -0.19539400 | 2.82469500 | 0.11031800  |
| C | -1.32803500 | 3.41621400 | -0.42560300 |
| H | -3.48065100 | 3.38357200 | -0.54087300 |
| H | -3.70035400 | 1.43662500 | 0.99127000  |
| H | -1.68997800 | 0.38250600 | 1.94531100  |
| H | 0.78240300  | 3.22075100 | -0.14667700 |
| H | -1.22686300 | 4.26481600 | -1.09585600 |
| C | 0.84892500  | 1.03781700 | 1.53024800  |
| C | 2.16870000  | 1.18360400 | 1.12605400  |
| H | 0.63375200  | 0.25103700 | 2.25118100  |
| H | 2.94223500  | 0.75508200 | 1.75528100  |
| H | 2.46618500  | 2.04639700 | 0.53937600  |

D

|   |             |             |             |
|---|-------------|-------------|-------------|
| C | 1.81166100  | 3.37744500  | 1.51056000  |
| C | 2.55287900  | 2.56648900  | 0.63316300  |
| C | 2.27480200  | 1.21768700  | 0.48186800  |
| C | 1.22180300  | 0.70068300  | 1.23607200  |
| C | 0.46267800  | 1.49329800  | 2.11937700  |
| C | 0.77110900  | 2.85246500  | 2.25831100  |
| N | 0.65917600  | -0.57768400 | 1.23794700  |
| C | -0.41145800 | -0.58507800 | 2.13205600  |
| C | -0.55608100 | 0.64425600  | 2.68613900  |
| C | 1.06810900  | -1.63404300 | 0.40755600  |
| O | 2.21625500  | -1.79806400 | 0.07638600  |
| N | -0.00218800 | -2.48441200 | 0.06997100  |
| O | 0.45116700  | -3.55367600 | -0.71452500 |
| C | 0.79551100  | -4.64408200 | 0.12005000  |
| H | 2.06260500  | 4.42989200  | 1.60340400  |
| H | 3.36422500  | 3.00571600  | 0.06088200  |
| H | 2.84437000  | 0.58638400  | -0.18826900 |
| H | 0.19707500  | 3.48073800  | 2.93330100  |
| H | -0.94521300 | -1.50628600 | 2.31265900  |
| H | -1.28841000 | 0.92072300  | 3.43151200  |
| H | 1.07175700  | -5.44964500 | -0.56308200 |

|   |             |             |             |
|---|-------------|-------------|-------------|
| H | 1.65331300  | -4.39840100 | 0.75616400  |
| H | -0.05529000 | -4.95090500 | 0.74008100  |
| C | -0.16104100 | 3.02238600  | -2.37701700 |
| C | 0.20406500  | 2.12300400  | -3.38343200 |
| C | -0.00436000 | 0.76650700  | -3.21588800 |
| C | -0.58804200 | 0.24896000  | -2.02703900 |
| C | -0.96879300 | 1.18710700  | -1.03052400 |
| C | -0.74902900 | 2.54233600  | -1.20520000 |
| H | 0.01458600  | 4.08601200  | -2.50441900 |
| H | 0.66136000  | 2.48876400  | -4.29820000 |
| H | 0.29497700  | 0.07006500  | -3.99480000 |
| H | -1.41638300 | 0.84775400  | -0.10170000 |
| H | -1.01928200 | 3.23130200  | -0.41103300 |
| C | -0.74009500 | -1.15236600 | -1.88827700 |
| C | -1.15386500 | -1.86755500 | -0.64263500 |
| H | -0.39744300 | -1.78283800 | -2.70448800 |
| H | -1.81797600 | -2.70566400 | -0.86690700 |
| H | -1.67157500 | -1.21529900 | 0.06098500  |

E

|   |             |             |             |
|---|-------------|-------------|-------------|
| C | -1.22997500 | 2.12923700  | 1.71642100  |
| C | -0.25674800 | 1.85876100  | 0.73636300  |
| C | 0.22909900  | 0.57582200  | 0.52929600  |
| C | -0.30767100 | -0.43477200 | 1.32589200  |
| C | -1.28188600 | -0.18965900 | 2.31491800  |
| C | -1.74018200 | 1.11850700  | 2.51553200  |
| N | -0.09157900 | -1.82086000 | 1.29537400  |
| C | -0.89135300 | -2.41409900 | 2.28177000  |
| C | -1.61586800 | -1.46021800 | 2.91473400  |
| C | 0.68576500  | -2.46589700 | 0.33516900  |
| O | 1.67476400  | -1.99754500 | -0.16176400 |
| N | 0.16040400  | -3.75195800 | -0.00176800 |
| O | 0.97203600  | -4.40004800 | -0.93142600 |
| C | 1.91425200  | -5.23838100 | -0.25945900 |
| H | -1.56619700 | 3.15084000  | 1.86286300  |
| H | 0.14667100  | 2.67761300  | 0.14875400  |
| H | 1.00339100  | 0.36861200  | -0.19913200 |
| H | -2.47791700 | 1.33353100  | 3.28235200  |
| H | -0.80990300 | -3.47497900 | 2.46959900  |
| H | -2.28832300 | -1.62552000 | 3.74474200  |
| H | 2.45537800  | -5.74198200 | -1.06076900 |

|   |             |             |             |
|---|-------------|-------------|-------------|
| H | 2.60920300  | -4.63716200 | 0.33379100  |
| H | 1.39965500  | -5.96918600 | 0.37166700  |
| C | -2.70835800 | 1.09191800  | -1.58148600 |
| C | -1.88723200 | 0.66170900  | -2.63729000 |
| C | -1.45304400 | -0.64036100 | -2.66042000 |
| C | -1.81109500 | -1.54162300 | -1.60155700 |
| C | -2.65688600 | -1.06905500 | -0.54323300 |
| C | -3.11353400 | 0.22690800  | -0.55615800 |
| H | -3.04348900 | 2.12465200  | -1.56061200 |
| H | -1.59913300 | 1.35545800  | -3.41860300 |
| H | -0.81434000 | -0.99783700 | -3.46265900 |
| H | -2.92985800 | -1.72624900 | 0.27513000  |
| H | -3.74172700 | 0.59415200  | 0.24585800  |
| C | -1.25961100 | -2.80652000 | -1.61338800 |
| C | -1.23071800 | -3.79662100 | -0.49642600 |
| H | -0.62847000 | -3.07813700 | -2.45940500 |
| H | -1.40083100 | -4.81250900 | -0.85519600 |
| H | -1.92292100 | -3.57688600 | 0.31425500  |

TSE-F

|   |             |             |             |
|---|-------------|-------------|-------------|
| C | 0.83389800  | 3.01271200  | 0.35446700  |
| C | 1.86350800  | 2.18355000  | -0.13338200 |
| C | 1.82545900  | 0.80707500  | 0.01854800  |
| C | 0.71464600  | 0.27956200  | 0.68190000  |
| C | -0.33573000 | 1.08819900  | 1.17078800  |
| C | -0.26318400 | 2.48092000  | 1.00667600  |
| N | 0.36027000  | -1.04920900 | 0.92012200  |
| C | -0.88673300 | -1.06328800 | 1.56558700  |
| C | -1.31757300 | 0.21210400  | 1.74822500  |
| C | 1.02476200  | -2.15929300 | 0.36291400  |
| O | 2.21871000  | -2.22696100 | 0.24266600  |
| N | 0.13455900  | -3.18445600 | 0.00852800  |
| O | 0.76830400  | -4.30164500 | -0.52037900 |
| C | 1.17004600  | -5.19530600 | 0.51936600  |
| H | 0.91426900  | 4.08670500  | 0.22263600  |
| H | 2.71737300  | 2.63548600  | -0.62750800 |
| H | 2.62988300  | 0.16986000  | -0.32840300 |
| H | -1.04966900 | 3.12315100  | 1.39064200  |
| H | -1.29318900 | -1.99746800 | 1.92577500  |
| H | -2.22236800 | 0.50375500  | 2.26294000  |
| H | 1.58572800  | -6.05641300 | -0.00415700 |

|   |             |             |             |
|---|-------------|-------------|-------------|
| H | 1.94174500  | -4.73847800 | 1.14494400  |
| H | 0.30960300  | -5.49802400 | 1.12466800  |
| C | -4.83577600 | 0.59754100  | -1.78167700 |
| C | -3.59657100 | 1.21736500  | -1.96487100 |
| C | -2.44228100 | 0.49335100  | -1.74601000 |
| C | -2.51909900 | -0.86885700 | -1.32644700 |
| C | -3.79705100 | -1.47143900 | -1.12982100 |
| C | -4.93798500 | -0.74264100 | -1.36813400 |
| H | -5.74514500 | 1.16385200  | -1.95954700 |
| H | -3.54465900 | 2.25379500  | -2.27814700 |
| H | -1.46737000 | 0.95493400  | -1.87524400 |
| H | -3.87268900 | -2.50081100 | -0.79619900 |
| H | -5.91494800 | -1.19229300 | -1.23144900 |
| C | -1.31624000 | -1.52858700 | -1.10909500 |
| C | -1.09846000 | -2.94476600 | -0.73370800 |
| H | -0.41873700 | -0.96435700 | -1.35680800 |
| H | -0.99003400 | -3.48506500 | -1.69064100 |
| H | -1.95554300 | -3.38290600 | -0.21444500 |

F

|   |             |             |             |
|---|-------------|-------------|-------------|
| C | 1.80915100  | 3.03241800  | 1.35882600  |
| C | 2.76924000  | 1.96444300  | 1.28182800  |
| C | 2.44513500  | 0.65898700  | 1.00989900  |
| C | 1.07779600  | 0.38624900  | 0.79638100  |
| C | 0.08645300  | 1.44917000  | 0.85605200  |
| C | 0.48855400  | 2.79526400  | 1.15332100  |
| N | 0.45570800  | -0.77008500 | 0.50757600  |
| C | -0.97689000 | -0.55454800 | 0.36319700  |
| C | -1.12659100 | 0.90323400  | 0.57165500  |
| C | 1.10772700  | -1.99478900 | 0.13249200  |
| O | 2.27599900  | -2.17877700 | 0.37486000  |
| N | 0.25507500  | -2.86471500 | -0.46433200 |
| O | 0.82205200  | -4.02556500 | -0.93330400 |
| C | 0.91519700  | -5.01507000 | 0.09842000  |
| H | 2.16194300  | 4.03220300  | 1.58516300  |
| H | 3.81320000  | 2.20873400  | 1.45437600  |
| H | 3.18263100  | -0.12991300 | 0.96487100  |
| H | -0.25522700 | 3.58246600  | 1.20731700  |
| H | -1.49949500 | -1.07583000 | 1.18154300  |
| H | -2.08570200 | 1.40550200  | 0.52313500  |
| H | 1.29468400  | -5.90288200 | -0.40709400 |

|   |             |             |             |
|---|-------------|-------------|-------------|
| H | 1.61978400  | -4.69690400 | 0.87107900  |
| H | -0.07024300 | -5.22167600 | 0.52897600  |
| C | -5.61856300 | -0.37299200 | -1.72863600 |
| C | -4.65080100 | 0.09199600  | -2.61421800 |
| C | -3.30352700 | -0.15838100 | -2.36880900 |
| C | -2.91252800 | -0.88170300 | -1.24070900 |
| C | -3.89098300 | -1.34642300 | -0.35608000 |
| C | -5.23695100 | -1.09250300 | -0.59854300 |
| H | -6.66902800 | -0.17879600 | -1.91894700 |
| H | -4.94255600 | 0.64819400  | -3.49918200 |
| H | -2.55290800 | 0.20410300  | -3.06678000 |
| H | -3.61480700 | -1.91863500 | 0.52750600  |
| H | -5.98771900 | -1.45937900 | 0.09380500  |
| C | -1.44309800 | -1.13592200 | -0.98683400 |
| C | -1.09188100 | -2.62795500 | -0.97424500 |
| H | -0.85073700 | -0.64257900 | -1.76625800 |
| H | -1.12668200 | -3.02994600 | -1.98952100 |
| H | -1.81168400 | -3.18534000 | -0.36346700 |

TSD-G

|   |             |             |             |
|---|-------------|-------------|-------------|
| C | 4.09787000  | 2.51021500  | 1.28387600  |
| C | 4.61771400  | 1.21668700  | 1.10708700  |
| C | 3.78853500  | 0.10721800  | 0.99589100  |
| C | 2.41586100  | 0.33186900  | 1.06518900  |
| C | 1.86786200  | 1.62578700  | 1.22953300  |
| C | 2.73163800  | 2.72572600  | 1.34682300  |
| N | 1.34859200  | -0.56863600 | 0.97129100  |
| C | 0.14400300  | 0.16409500  | 0.99293000  |
| C | 0.44531400  | 1.49382900  | 1.23969400  |
| C | 1.45669700  | -1.87510700 | 0.49159600  |
| O | 2.44785200  | -2.55628400 | 0.63799500  |
| N | 0.25789900  | -2.32671100 | -0.06595800 |
| O | 0.33831600  | -3.65953200 | -0.46893500 |
| C | 0.00740300  | -4.51529500 | 0.61177300  |
| H | 4.78077500  | 3.34987600  | 1.37182200  |
| H | 5.69347800  | 1.07668300  | 1.06232000  |
| H | 4.18109000  | -0.89406000 | 0.87370300  |
| H | 2.32882300  | 3.72528200  | 1.48112500  |
| H | -0.77294800 | -0.35013400 | 1.24894600  |
| H | -0.28301900 | 2.28042700  | 1.37586000  |
| H | 0.00269600  | -5.52049400 | 0.18595900  |

|   |             |             |             |
|---|-------------|-------------|-------------|
| H | 0.76201400  | -4.45700600 | 1.40299600  |
| H | -0.98288100 | -4.27387200 | 1.01565900  |
| C | -3.29440600 | 2.75984400  | -2.04536900 |
| C | -1.93978900 | 3.08141200  | -2.13590300 |
| C | -0.97468800 | 2.12630700  | -1.85582700 |
| C | -1.32982400 | 0.81384700  | -1.48003800 |
| C | -2.70203900 | 0.51153400  | -1.38459900 |
| C | -3.66617000 | 1.47108800  | -1.66705600 |
| H | -4.05125700 | 3.50622600  | -2.26579300 |
| H | -1.63668500 | 4.08319300  | -2.42659100 |
| H | 0.07919900  | 2.38495500  | -1.92030600 |
| H | -3.02612500 | -0.47975200 | -1.08218500 |
| H | -4.71796800 | 1.21190400  | -1.58710000 |
| C | -0.27305800 | -0.11155800 | -1.12986100 |
| C | -0.47304000 | -1.59791700 | -1.12399500 |
| H | 0.72952600  | 0.21268800  | -1.40507900 |
| H | -0.13176600 | -2.01789800 | -2.08072000 |
| H | -1.52553700 | -1.86746300 | -1.01074500 |

G

|   |             |             |             |
|---|-------------|-------------|-------------|
| C | 4.24252800  | 2.36692900  | 1.80708700  |
| C | 4.66309500  | 1.02947000  | 1.78357600  |
| C | 3.79118600  | -0.00898700 | 1.43593300  |
| C | 2.49072100  | 0.33212400  | 1.10926800  |
| C | 2.03543800  | 1.68527900  | 1.11992400  |
| C | 2.93945600  | 2.70708800  | 1.48064700  |
| N | 1.42136200  | -0.48339800 | 0.72292300  |
| C | 0.22118900  | 0.31876500  | 0.46766900  |
| C | 0.69085700  | 1.71388800  | 0.73486900  |
| C | 1.51899200  | -1.80161900 | 0.32163700  |
| O | 2.49126300  | -2.50532700 | 0.51716200  |
| N | 0.32702700  | -2.26937000 | -0.23322600 |
| O | 0.41819400  | -3.56287700 | -0.73228900 |
| C | 0.12663300  | -4.50311000 | 0.28984600  |
| H | 4.94809900  | 3.14359100  | 2.08610000  |
| H | 5.68988100  | 0.78896600  | 2.04162300  |
| H | 4.10923200  | -1.04267400 | 1.41542500  |
| H | 2.60995400  | 3.74161700  | 1.49690600  |
| H | -0.57851500 | 0.01780900  | 1.16510100  |
| H | 0.04939200  | 2.58033400  | 0.64780200  |
| H | 0.14270600  | -5.47597300 | -0.20554100 |

|   |             |             |             |
|---|-------------|-------------|-------------|
| H | 0.89143600  | -4.47465100 | 1.07157500  |
| H | -0.86439500 | -4.31940600 | 0.72202600  |
| C | -3.56572200 | 2.55796100  | -2.09344600 |
| C | -2.33879300 | 2.67682800  | -2.73944200 |
| C | -1.27757300 | 1.85022100  | -2.38066000 |
| C | -1.42504300 | 0.89104200  | -1.37705600 |
| C | -2.66107500 | 0.78399800  | -0.73155600 |
| C | -3.72336100 | 1.60935300  | -1.08601700 |
| H | -4.39447200 | 3.20164800  | -2.37248800 |
| H | -2.20522500 | 3.41521000  | -3.52450500 |
| H | -0.31969900 | 1.95191600  | -2.88435100 |
| H | -2.79999800 | 0.05115100  | 0.05984600  |
| H | -4.67622600 | 1.51070300  | -0.57459400 |
| C | -0.25110800 | 0.02836700  | -0.97248900 |
| C | -0.55206200 | -1.47180700 | -1.08653800 |
| H | 0.60045600  | 0.26691000  | -1.62054300 |
| H | -0.42154600 | -1.80375500 | -2.12214700 |
| H | -1.58732500 | -1.68423900 | -0.79904700 |

3aa

|   |             |             |             |
|---|-------------|-------------|-------------|
| C | 7.11528700  | -1.07965600 | -0.42072700 |
| C | 6.55413300  | -2.01248900 | 0.46625900  |
| C | 5.23906600  | -2.43788900 | 0.34031500  |
| C | 4.49548800  | -1.89726600 | -0.70905800 |
| C | 5.03900000  | -0.95951000 | -1.61037900 |
| C | 6.36782600  | -0.54822300 | -1.45906800 |
| N | 3.16471800  | -2.10591500 | -1.08904200 |
| C | 2.89431700  | -1.31635400 | -2.21667700 |
| C | 4.00401000  | -0.61388300 | -2.55190600 |
| C | 2.25399300  | -2.95983500 | -0.44808200 |
| O | 2.56557600  | -3.69872000 | 0.46211000  |
| N | 0.98637800  | -2.87086000 | -0.97708200 |
| O | 0.01023100  | -3.61682400 | -0.35422200 |
| C | -0.38916600 | -3.04522700 | 0.89065400  |
| H | 8.14902200  | -0.77430200 | -0.28892100 |
| H | 7.16274900  | -2.41527200 | 1.27032500  |
| H | 4.80292500  | -3.16097600 | 1.01594000  |
| H | 6.80030800  | 0.17323600  | -2.14620500 |
| H | 4.07959700  | 0.08098400  | -3.37658200 |
| H | -1.16108800 | -3.71663300 | 1.26961300  |
| H | 0.45078600  | -3.01330700 | 1.58949000  |

|   |             |             |             |
|---|-------------|-------------|-------------|
| H | -0.81473400 | -2.04375900 | 0.74980100  |
| C | 0.26124400  | 2.04633900  | -5.07234700 |
| C | 0.15335100  | 0.77658400  | -5.63094500 |
| C | 0.58544100  | -0.33840000 | -4.91670900 |
| C | 1.13069500  | -0.19913200 | -3.64038600 |
| C | 1.23471900  | 1.08046600  | -3.08695000 |
| C | 0.80404500  | 2.19546400  | -3.79784600 |
| H | -0.07285300 | 2.91747600  | -5.62786000 |
| H | -0.26649700 | 0.65084300  | -6.62446900 |
| H | 0.49913300  | -1.32815700 | -5.35864600 |
| H | 1.67356000  | 1.20386100  | -2.10049700 |
| H | 0.89582800  | 3.18320500  | -3.35599900 |
| C | 1.54039400  | -1.42556100 | -2.85151000 |
| C | 0.51759000  | -1.73538700 | -1.75042900 |
| H | 1.54906500  | -2.29165500 | -3.52757400 |
| H | -0.44025500 | -2.01993300 | -2.19030000 |
| H | 0.36193700  | -0.84642600 | -1.12081200 |

TSC-D'

|   |             |             |             |
|---|-------------|-------------|-------------|
| C | 5.37682200  | -0.37838400 | 0.82126800  |
| C | 4.76252600  | 0.86723200  | 1.03105200  |
| C | 3.48696600  | 1.13743000  | 0.55698500  |
| C | 2.83674800  | 0.11472900  | -0.13569700 |
| C | 3.43354700  | -1.14398400 | -0.35504700 |
| C | 4.72358200  | -1.38658500 | 0.13076100  |
| N | 1.55594800  | 0.07132200  | -0.69393500 |
| C | 1.37271500  | -1.18921400 | -1.26939600 |
| C | 2.48170900  | -1.94529800 | -1.08554400 |
| C | 0.60603200  | 1.10107200  | -0.61965000 |
| O | 0.90325200  | 2.25069600  | -0.39682100 |
| N | -0.69027000 | 0.58610400  | -0.83332500 |
| O | -1.56485200 | 1.63624000  | -0.88347500 |
| C | -2.53418600 | 1.39934200  | -1.89691900 |
| H | 6.37783600  | -0.54993600 | 1.20565000  |
| H | 5.29953000  | 1.64165500  | 1.57061300  |
| H | 3.01516100  | 2.10101400  | 0.69744000  |
| H | 5.19940800  | -2.34963400 | -0.02999000 |
| H | 0.44877600  | -1.40230200 | -1.78446800 |
| H | 2.62600600  | -2.95537600 | -1.44254100 |
| H | -3.26947100 | 2.19784700  | -1.78403100 |
| H | -2.06689200 | 1.45464300  | -2.88616800 |



|   |             |             |             |
|---|-------------|-------------|-------------|
| H | -3.01782500 | 0.42751700  | -1.76553000 |
| C | -5.33825900 | -0.75426900 | 0.41111300  |
| C | -4.50846300 | -1.79435400 | -0.00146600 |
| C | -3.13036000 | -1.68278800 | 0.14692400  |
| C | -2.56192500 | -0.53838900 | 0.71459200  |
| C | -3.40366100 | 0.49896400  | 1.12886000  |
| C | -4.78162300 | 0.39086500  | 0.97619500  |
| H | -6.41437000 | -0.83632900 | 0.29162500  |
| H | -4.93461800 | -2.69077000 | -0.44176700 |
| H | -2.48231200 | -2.48951400 | -0.18657000 |
| H | -2.97976400 | 1.40789600  | 1.54260700  |
| H | -5.42372700 | 1.20647800  | 1.29519200  |
| C | -1.08694300 | -0.44037300 | 0.81466900  |
| C | -0.46764900 | 0.25388700  | 1.85940000  |
| H | -0.55845400 | -1.32167000 | 0.45913900  |
| H | 0.59317700  | 0.12649600  | 2.04871800  |
| H | -0.98963800 | 1.00881500  | 2.43672300  |

D'

|   |             |             |             |
|---|-------------|-------------|-------------|
| C | 5.37531400  | -0.20558300 | 0.80102800  |
| C | 4.92907700  | 0.70269400  | -0.17393500 |
| C | 3.59753100  | 0.76133500  | -0.55698200 |
| C | 2.71717300  | -0.11992000 | 0.07131400  |
| C | 3.14170600  | -1.03737800 | 1.05311900  |
| C | 4.49303900  | -1.07750300 | 1.41732400  |
| N | 1.33530800  | -0.27506700 | -0.07350100 |
| C | 0.91824800  | -1.30109000 | 0.78100600  |
| C | 1.97824500  | -1.77851800 | 1.47607000  |
| C | 0.52852600  | 0.45061900  | -0.96137200 |
| O | 0.94924200  | 0.93941100  | -1.98220300 |
| N | -0.81724000 | 0.46787300  | -0.55363600 |
| O | -1.62885900 | 1.02419800  | -1.54380300 |
| C | -2.23811200 | -0.01534400 | -2.29115400 |
| H | 6.42733800  | -0.22438300 | 1.06935200  |
| H | 5.64331100  | 1.37147800  | -0.64471500 |
| H | 3.25250100  | 1.44558000  | -1.32153000 |
| H | 4.83873000  | -1.78069800 | 2.16937700  |
| H | -0.11573600 | -1.61242400 | 0.77103400  |
| H | 1.95210300  | -2.58499400 | 2.19530500  |
| H | -2.88374800 | 0.49243300  | -3.01059400 |
| H | -1.48624000 | -0.60439600 | -2.82865400 |

|   |             |             |             |
|---|-------------|-------------|-------------|
| H | -2.83503600 | -0.66500900 | -1.64164900 |
| C | -4.90872300 | -0.51333600 | 2.14815800  |
| C | -3.70858900 | -0.97412600 | 2.68153200  |
| C | -2.50033600 | -0.44528800 | 2.23437800  |
| C | -2.47878300 | 0.54613000  | 1.25328900  |
| C | -3.68736300 | 1.01210500  | 0.73041000  |
| C | -4.89496300 | 0.48139200  | 1.17233800  |
| H | -5.85210600 | -0.92378800 | 2.49589400  |
| H | -3.71142800 | -1.74258700 | 3.44872800  |
| H | -1.56429200 | -0.80369500 | 2.65744700  |
| H | -3.67104900 | 1.78902900  | -0.02768000 |
| H | -5.82875300 | 0.84924800  | 0.75713300  |
| C | -1.15151100 | 1.09138300  | 0.74843700  |
| C | -1.10399800 | 2.58276000  | 0.66687800  |
| H | -0.37550300 | 0.74564700  | 1.44497200  |
| H | -0.68479200 | 3.07702500  | -0.20137300 |
| H | -1.43508600 | 3.17190100  | 1.51461400  |

## Scope for other electron-rich aromatic<sup>27</sup>

In addition to indole, we also tested some other electron rich aromatic ring substrates. At first, we tried to react **2a** with **1u**, regioisomer mixtures **3ua** and **3ua'** were obtained with the yield of 15% and 13%, respectively. Next, we tried to react **2a** with **1v**, the corresponding product **3va** was furnished with a yield of 21%. However, the directing group was installed at 3-position of indole or the arene ring (**1w** or **1z**), the reaction was totally inhibited and the corresponding product was not detected. Moreover, the substrate was decomposed during the transformation.

### a) attempt reaction of **2a** with **1u** or **1v**

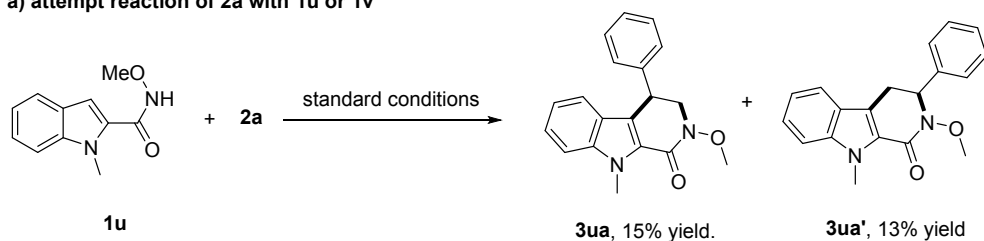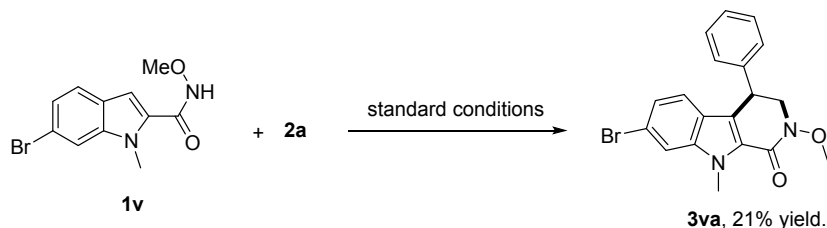

### b) attempt reaction of **2a** with **1w** or **1z**

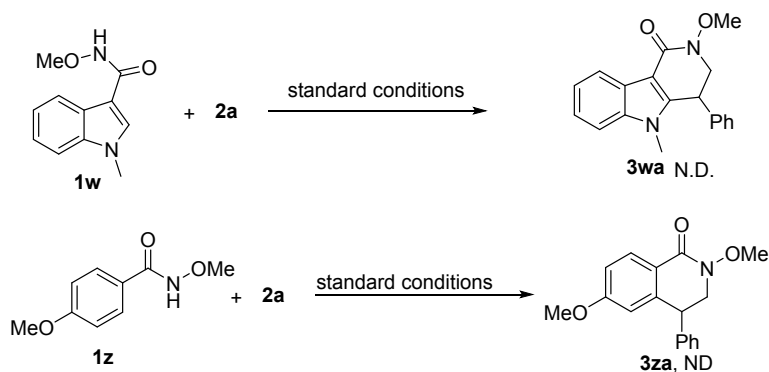

## Characterization of products

### 2-methoxy-4-phenyl-3,4-dihydropyrimido[1,6-*a*]indol-1(2*H*)-one (**3aa**)

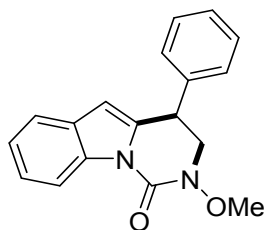

**3aa**

**3aa** was obtained in 85% (49.2 mg) as a white solid after column chromatography (eluent: petroleum ether/ethyl acetate = 8/1 v/v). Mp: 156-158 °C.

**<sup>1</sup>H NMR (500 MHz, CDCl<sub>3</sub>):** δ 8.45 (d, *J* = 8.3 Hz, 1H), 7.46-7.29 (m, 7H), 7.22 (t, *J* = 7.5 Hz, 1H), 6.07 (s, 1H), 4.57 (dd, *J* = 9.8, 5.4 Hz, 1H), 3.98-3.85 (m, 2H), 3.85 (s, 3H).

**<sup>13</sup>C NMR (125 MHz, CDCl<sub>3</sub>):** δ 152.5, 138.3, 137.2, 135.5, 129.5, 128.2, 128.0, 124.3, 123.1, 120.2, 115.5, 105.2, 62.7, 54.6, 40.9.

**HRMS (ESI-TOF, [M + Na]<sup>+</sup>):** For C<sub>18</sub>H<sub>16</sub>N<sub>2</sub>NaO<sub>2</sub>, 315.1109, Found: 315.1113.

#### 4-(4-fluorophenyl)-2-methoxy-3,4-dihydropyrimido[1,6-*a*]indol-1(2*H*)-one (**3ab**)

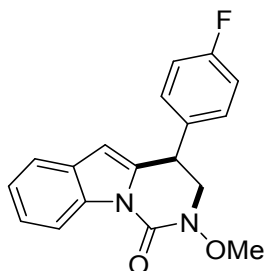

**3ab**

**3ab** was obtained in 55% yield (34.1 mg) as a white solid after column chromatography (eluent: petroleum ether/ethyl acetate = 8/1 v/v). Mp: 178-180 °C.

**<sup>1</sup>H NMR (500 MHz, CDCl<sub>3</sub>):** δ 8.44 (d, *J* = 8.3 Hz, 1H), 7.44 (d, *J* = 7.7 Hz, 1H), 7.36-7.28 (m, 3H), 7.23 (t, *J* = 7.5 Hz, 1H), 7.09 (t, *J* = 8.6 Hz, 2H), 6.06 (s, 1H), 4.57 (dd, *J* = 9.4, 4.9 Hz, 1H), 3.92 (dd, *J* = 10.8, 5.4 Hz, 1H), 3.85 (s, 3H), 3.82 (d, *J* = 10.5 Hz, 1H).

**<sup>13</sup>C NMR (125 MHz, CDCl<sub>3</sub>):** δ 162.3 (d, *J* = 246.9 Hz), 152.4, 137.0, 135.5, 134.1, 129.9 (d, *J* = 5.0 Hz), 124.4, 123.2, 120.3, 116.0, 115.9 (d, *J* = 21.3 Hz), 105.2, 62.8, 54.7, 40.2.

**HRMS (ESI-TOF, [M + H]<sup>+</sup>):** For C<sub>18</sub>H<sub>16</sub>FN<sub>2</sub>O<sub>2</sub>, 311.1196, Found: 311.1197.

**4-(4-chlorophenyl)-2-methoxy-3,4-dihydropyrimido[1,6-*a*]indol-1(2*H*)-one (3ac)**

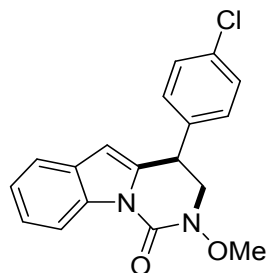

**3ac**

**3ac** was obtained in 70% (45.5 mg) as a white solid after column chromatography (eluent: petroleum ether/ethyl acetate = 8/1 v/v). Mp: 195-197 °C.

**<sup>1</sup>H NMR (500 MHz, CDCl<sub>3</sub>):**  $\delta$  8.44 (d,  $J$  = 8.3 Hz, 1H), 7.44 (d,  $J$  = 7.7 Hz, 1H), 7.39-7.30 (m, 3H), 7.25 (m, 3H), 6.06 (s, 1H), 4.55 (dd,  $J$  = 9.5, 5.3 Hz, 1H), 3.92 (dd,  $J$  = 10.8, 5.3 Hz, 1H), 3.85 (s, 3H), 3.81 (d,  $J$  = 10.4 Hz, 1H).

**<sup>13</sup>C NMR (125 MHz, CDCl<sub>3</sub>):**  $\delta$  152.4, 136.9, 136.6, 135.5, 133.9, 129.6, 129.4, 129.1, 124.4, 123.3, 120.3, 115.5, 105.3, 62.8, 54.5, 40.3.

**HRMS (ESI-TOF, [M + H]<sup>+</sup>):** For C<sub>18</sub>H<sub>16</sub>ClN<sub>2</sub>O<sub>2</sub>, 327.0900, Found: 327.0903.

**4-(4-bromophenyl)-2-methoxy-3,4-dihydropyrimido[1,6-*a*]indol-1(2*H*)-one (3ad)**

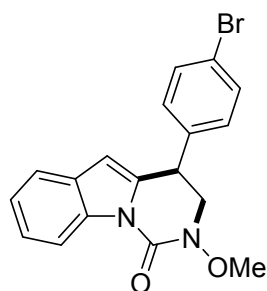

**3ad**

**3ad** was obtained in 78% (57.9 mg) as a white solid after column chromatography (eluent: petroleum ether/ethyl acetate = 8/1 v/v). Mp: 201-203 °C.

**<sup>1</sup>H NMR (500 MHz, CDCl<sub>3</sub>):**  $\delta$  8.43 (d,  $J$  = 8.2 Hz, 1H), 7.52 (d,  $J$  = 8.2 Hz, 2H), 7.44 (d,  $J$  = 7.7 Hz, 1H), 7.33 (t,  $J$  = 7.7 Hz, 1H), 7.22 (m, 3H), 6.06 (s, 1H), 4.54 (dd,  $J$  = 9.3, 5.3 Hz, 1H), 3.92 (dd,  $J$  = 10.7, 5.3 Hz, 1H), 3.84 (s, 3H), 3.81 (d,  $J$  = 10.3 Hz, 1H).

$^{13}\text{C}$  NMR (125 MHz,  $\text{CDCl}_3$ ):  $\delta$  152.4, 137.4, 136.5, 135.5, 132.1, 129.9, 129.4, 124.4, 123.3, 122.0, 120.3, 115.5, 105.3, 62.8, 54.5, 40.3.

HRMS (ESI-TOF,  $[\text{M} + \text{H}]^+$ ): For  $\text{C}_{18}\text{H}_{16}\text{BrN}_2\text{O}_2$ , 371.0395, Found: 371.0394.

**2-methoxy-4-(*p*-tolyl)-3,4-dihydropyrimido[1,6-*a*]indol-1(2*H*)-one (3ae)**

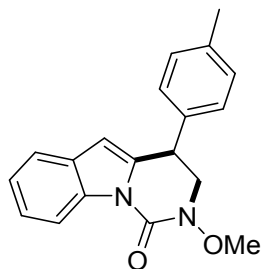

**3ae**

**3ae** was obtained in 81% (49.6 mg) as a white solid after column chromatography (eluent: petroleum ether/ethyl acetate = 8/1 v/v). Mp: 187-189 °C.

$^1\text{H}$  NMR (500 MHz,  $\text{CDCl}_3$ ):  $\delta$  8.44 (d,  $J = 8.3$  Hz, 1H), 7.42 (d,  $J = 7.7$  Hz, 1H), 7.31 (t,  $J = 7.6$  Hz, 1H), 7.21 (m, 5H), 6.05 (s, 1H), 4.53 (dd,  $J = 9.3, 5.7$  Hz, 1H), 3.99-3.77 (m, 5H), 2.38 (s, 3H).

$^{13}\text{C}$  NMR (125 MHz,  $\text{CDCl}_3$ ):  $\delta$  152.5, 137.8, 137.6, 135.5, 135.2, 129.6, 128.1, 124.2, 123.1, 120.2, 115.5, 105.1, 62.7, 54.7, 40.5, 21.1.

HRMS (ESI-TOF,  $[\text{M} + \text{H}]^+$ ): For  $\text{C}_{19}\text{H}_{19}\text{N}_2\text{O}_2$ , 307.1447, Found: 307.1456.

**2-methoxy-4-(4-methoxyphenyl)-3,4-dihydropyrimido[1,6-*a*]indol-1(2*H*)-one (3af)**

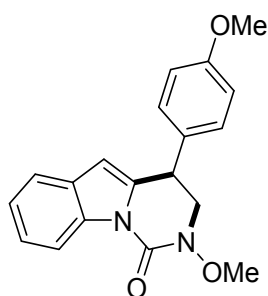

**3af**

**3af** was obtained in 92% (59.2 mg) as a white solid after column chromatography (eluent: petroleum ether/ethyl acetate = 8/1 v/v). Mp: 198-200 °C.

**<sup>1</sup>H NMR (500 MHz, CDCl<sub>3</sub>):** δ 8.44 (d, *J* = 8.3 Hz, 1H), 7.43 (d, *J* = 7.7 Hz, 1H), 7.31 (t, *J* = 7.8, 7.8 Hz, 1H), 7.26 – 7.18 (m, 3H), 6.92 (d, *J* = 8.6 Hz, 2H), 6.05 (s, 1H), 4.52 (dd, *J* = 5.5, 10.1 Hz, 1H), 3.89 (dd, *J* = 5.6, 10.7 Hz, 2H), 3.86 (s, 3H), 3.83 (s, 3H).

**<sup>13</sup>C NMR (125 MHz, CDCl<sub>3</sub>):** δ 159.3, 152.5, 137.7, 135.5, 130.2, 129.5, 124.2, 123.1, 120.2, 115.5, 114.3, 105.0, 62.7, 55.3, 54.8, 40.2.

**HRMS (ESI-TOF, [M + H]<sup>+</sup>):** For C<sub>19</sub>H<sub>19</sub>N<sub>2</sub>O<sub>3</sub>, 323.1396, Found: 323.1398.

#### 4-(4-(*tert*-butyl)phenyl)-2-methoxy-3,4-dihydropyrimido[1,6-*a*]indol-1(2*H*)-one

(**3ag**)

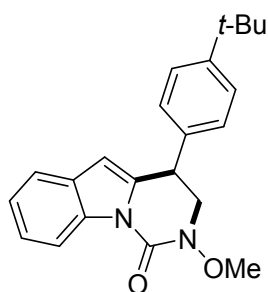

**3ag**

**3ag** was obtained in 74% (51.7 mg) as a white solid after column chromatography (eluent: petroleum ether/ethyl acetate = 8/1 v/v). Mp: 216-218 °C.

**<sup>1</sup>H NMR (500 MHz, CDCl<sub>3</sub>):** δ 8.45 (d, *J* = 8.3 Hz, 1H), 7.45-7.38 (m, 3H), 7.31 (t, *J* = 7.8 Hz, 1H), 7.27 (d, *J* = 8.3 Hz, 2H), 7.22 (t, *J* = 7.5 Hz, 1H), 6.08 (s, 1H), 4.54 (dd, *J* = 9.9, 5.8 Hz, 1H), 3.93-3.85 (m, 5H), 1.34 (s, 9H).

**<sup>13</sup>C NMR (125 MHz, CDCl<sub>3</sub>):** δ 152.5, 151.0, 137.6, 135.5, 135.1, 129.6, 127.9, 125.8, 124.2, 123.1, 120.2, 115.5, 105.1, 62.7, 54.6, 40.5, 34.6, 31.3.

**HRMS (ESI-TOF, [M + H]<sup>+</sup>):** For C<sub>22</sub>H<sub>25</sub>N<sub>2</sub>O<sub>2</sub>, 349.1916, Found: 349.1913.

#### 4-(3-chlorophenyl)-2-methoxy-3,4-dihydropyrimido[1,6-*a*]indol-1(2*H*)-one (**3ah**)

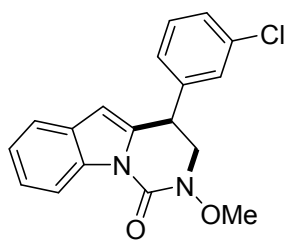

**3ah**

**3ah** was obtained in 44% (28.5 mg) as a white solid after column chromatography (eluent: petroleum ether/ethyl acetate = 8/1 v/v). Mp: 198-200 °C.

**<sup>1</sup>H NMR (500 MHz, CDCl<sub>3</sub>):** δ 8.41 (d, *J* = 8.3 Hz, 1H), 7.43 (d, *J* = 7.8 Hz, 1H), 7.31 (m, 3H), 7.26-7.16 (m, 3H), 6.07 (s, 1H), 4.53 (dd, *J* = 9.4, 5.4 Hz, 1H), 4.00-3.74 (m, 5H).

**<sup>13</sup>C NMR (125 MHz, CDCl<sub>3</sub>):** δ 152.4, 140.4, 136.2, 135.5, 134.8, 130.2, 129.4, 128.4, 128.3, 126.4, 124.5, 123.3, 120.3, 115.5, 105.4, 62.8, 54.5, 40.5.

**HRMS (ESI-TOF, [M + Na]<sup>+</sup>):** For C<sub>18</sub>H<sub>15</sub>ClN<sub>2</sub>NaO<sub>2</sub>, 349.0720, Found: 349.0716.

### 2-methoxy-4-(*o*-tolyl)-3,4-dihydropyrimido[1,6-*a*]indol-1(2*H*)-one (3ai)

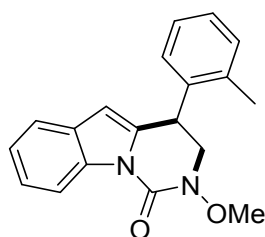

**3ai**

**3ai** was obtained in 75% (45.9 mg) as a white solid after column chromatography (eluent: petroleum ether/ethyl acetate = 8/1 v/v). Mp: 193-195 °C.

**<sup>1</sup>H NMR (500 MHz, CDCl<sub>3</sub>):** δ 8.46 (d, *J* = 8.3 Hz, 1H), 7.42 (d, *J* = 7.7 Hz, 1H), 7.32 (t, *J* = 7.8 Hz, 1H), 7.30-7.16 (m, 5H), 6.00 (s, 1H), 4.82 (t, *J* = 7.9 Hz, 1H), 3.88 (d, *J* = 8.7 Hz, 2H), 3.87 (s, 3H), 2.48 (s, 3H).

**<sup>13</sup>C NMR (125 MHz, CDCl<sub>3</sub>):** δ 152.5, 137.3, 136.3, 135.9, 135.5, 130.9, 129.6, 127.9, 126.6, 124.2, 123.1, 120.2, 115.5, 104.8, 62.7, 53.4, 36.9, 19.6.

**HRMS (ESI-TOF, [M + Na]<sup>+</sup>):** For C<sub>19</sub>H<sub>18</sub>N<sub>2</sub>NaO<sub>2</sub>, 329.1266, Found: 329.1264.

### 4-(2-chlorophenyl)-2-methoxy-3,4-dihydropyrimido[1,6-*a*]indol-1(2*H*)-one (3aj)

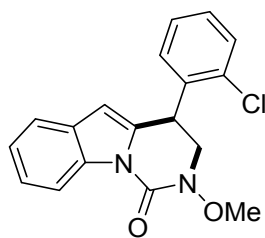

**3aj**



**3aj** was obtained in 57% (37.1 mg) as a white solid after column chromatography (eluent: petroleum ether/ethyl acetate = 8/1 v/v). Mp: 201-203 °C.

**<sup>1</sup>H NMR (500 MHz, CDCl<sub>3</sub>):** δ 8.47 (d, *J* = 8.3 Hz, 1H), 7.51-7.44 (m, 2H), 7.37-7.32 (m, 1H), 7.31-7.19 (m, 3H), 7.13 (dd, *J* = 7.7, 1.5 Hz, 1H), 6.19 (s, 1H), 5.16-5.06 (m, 1H), 4.07-3.99 (m, 1H), 3.85 (dd, *J* = 11.0, 7.7 Hz, 1H), 3.77 (s, 3H).

**<sup>13</sup>C NMR (125 MHz, CDCl<sub>3</sub>):** δ 152.2, 136.5, 135.5, 135.5, 133.4, 129.9, 129.5, 129.2, 127.3, 124.4, 123.2, 120.3, 115.5, 105.2, 62.6, 52.9, 37.1.

**HRMS (ESI-TOF, [M + Na]<sup>+</sup>):** For C<sub>18</sub>H<sub>15</sub>ClN<sub>2</sub>NaO<sub>2</sub>, 349.0720, Found: 349.0719.

### 2-methoxy-4-(naphthalen-2-yl)-3,4-dihydropyrimido[1,6-*a*]indol-1(2*H*)-one (3ak)

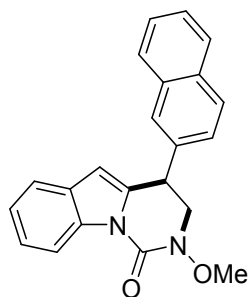

**3ak**

**3ak** was obtained in 80% (54.7 mg) as a white solid after column chromatography (eluent: petroleum ether/ethyl acetate = 8/1 v/v). Mp: 221-223 °C.

**<sup>1</sup>H NMR (500 MHz, CDCl<sub>3</sub>):** δ 8.48 (d, *J* = 8.2 Hz, 1H), 7.94-7.72 (m, 4H), 7.52 (dd, *J* = 6.2, 3.2 Hz, 2H), 7.43 (d, *J* = 7.2 Hz, 2H), 7.37-7.30 (m, 1H), 7.23 (dd, *J* = 13.0, 5.4 Hz, 1H), 6.07 (s, 1H), 4.76-4.68 (m, 1H), 4.12-3.64 (m, 5H).

**<sup>13</sup>C NMR (125 MHz, CDCl<sub>3</sub>):** δ 152.5, 137.2, 135.6, 135.5, 133.3, 132.9, 129.6, 128.8, 127.8, 127.7, 127.5, 126.5, 126.3, 125.7, 124.3, 123.2, 120.3, 115.5, 105.4, 62.8, 54.6, 41.1.

**HRMS (ESI-TOF, [M + Na]<sup>+</sup>):** For C<sub>22</sub>H<sub>18</sub>N<sub>2</sub>NaO<sub>2</sub>, 365.1266, Found: 365.1269.

### 2-methoxy-4,4-diphenyl-3,4-dihydropyrimido[1,6-*a*]indol-1(2*H*)-one (3al)

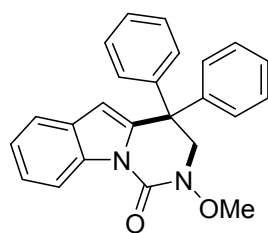

**3al**

**3al** was obtained in 88% (65.1 mg) as a white solid after column chromatography (eluent: petroleum ether/ethyl acetate = 8/1 v/v). Mp: 234-236 °C.

**<sup>1</sup>H NMR (500 MHz, CDCl<sub>3</sub>):**  $\delta$  8.45 (d,  $J$  = 8.3 Hz, 1H), 7.47 (d,  $J$  = 7.7 Hz, 1H), 7.33 (d,  $J$  = 7.6 Hz, 7H), 7.24 (t,  $J$  = 7.0 Hz, 1H), 7.16 (d,  $J$  = 6.4 Hz, 4H), 6.08 (s, 1H), 4.46 (s, 2H), 3.52 (s, 3H).

**<sup>13</sup>C NMR (125 MHz, CDCl<sub>3</sub>):**  $\delta$  151.3, 142.0, 140.1, 135.7, 128.9, 128.5, 128.1, 127.6, 124.5, 123.1, 120.5, 115.5, 107.6, 62.3, 58.7, 50.9.

**HRMS (ESI-TOF, [M + Na]<sup>+</sup>):** For C<sub>24</sub>H<sub>20</sub>N<sub>2</sub>NaO<sub>2</sub>, 391.1417, Found: 391.1420.

#### **4,4-bis(4-fluorophenyl)-2-methoxy-3,4-dihydropyrimido[1,6-*a*]indol-1(2H)-one**

**(3am)**

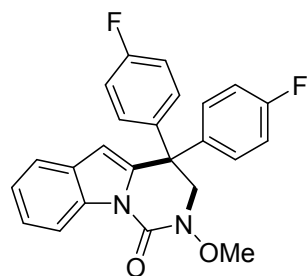

**3am**

**3am** was obtained in 49% (39.6 mg) as a white solid after column chromatography (eluent: petroleum ether/ethyl acetate = 8/1 v/v). Mp: 219-221 °C.

**<sup>1</sup>H NMR (400 MHz, CDCl<sub>3</sub>):**  $\delta$  8.42 (d,  $J$  = 8.3 Hz, 1H), 7.47 (d,  $J$  = 7.7 Hz, 1H), 7.35 (t,  $J$  = 7.3 Hz, 1H), 7.28-7.23 (m, 1H), 7.15-7.09 (m, 4H), 7.03 (t,  $J$  = 8.6 Hz, 4H), 6.05 (s, 1H), 4.39 (s, 2H), 3.57 (s, 3H).

**<sup>13</sup>C NMR (125 MHz, CDCl<sub>3</sub>):**  $\delta$  162.1(d,  $J$  = 248.2 Hz), 151.3, 139.8, 137.5, 135.8, 129.8 (d,  $J$  = 6.6 Hz), 124.9, 123.4, 120.6, 115.5 (d,  $J$  = 20.9 Hz), 107.6, 62.5, 59.0, 50.0.

**HRMS (ESI-TOF, [M + H]<sup>+</sup>):** For C<sub>24</sub>H<sub>19</sub>F<sub>2</sub>N<sub>2</sub>O<sub>2</sub>, 405.1415, Found: 405.1413.

**2-methoxy-4-methyl-4-phenyl-3,4-dihydropyrimido[1,6-*a*]indol-1(2*H*)-one (3an)**

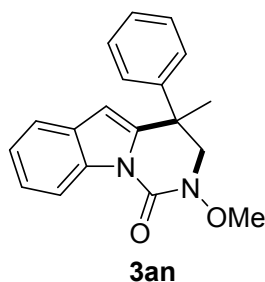

**3an** was obtained in 85% (52.0 mg) as a white solid after column chromatography (eluent: petroleum ether/ethyl acetate = 8/1 v/v). Mp: 225-227 °C.

**<sup>1</sup>H NMR (500 MHz, CDCl<sub>3</sub>):** δ 8.48 (d, *J* = 8.2 Hz, 1H), 7.59 (d, *J* = 7.7 Hz, 1H), 7.43-7.27 (m, 5H), 7.21 (d, *J* = 7.4 Hz, 2H), 6.47 (s, 1H), 4.24-3.86 (m, 2H), 3.60 (s, 3H), 1.87 (s, 3H).

**<sup>13</sup>C NMR (125 MHz, CDCl<sub>3</sub>):** δ 151.6, 143.6, 140.9, 135.5, 129.3, 128.6, 127.4, 126.1, 123.1, 120.4, 115.5, 104.4, 62.3, 60.2, 41.5, 3.

**HRMS (ESI-TOF, [M + H]<sup>+</sup>):** For C<sub>19</sub>H<sub>18</sub>N<sub>2</sub>NaO<sub>2</sub>, 329.1266, Found: 329.1266.

**2-methoxy-4-(4-methoxyphenyl)-4-methyl-3,4-dihydropyrimido[1,6-*a*]indol-1(2*H*)-one (3ao)**

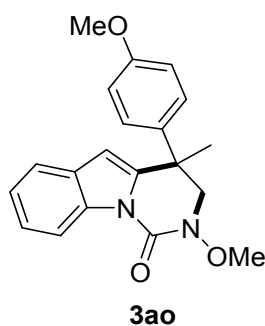

**3an** was obtained in 89% (59.8 mg) as a white solid after column chromatography (eluent: petroleum ether/ethyl acetate = 8/1 v/v). Mp: 239-241 °C.

**<sup>1</sup>H NMR (400 MHz, CDCl<sub>3</sub>):** δ 8.43 (d, *J* = 8.3 Hz, 1H), 7.53 (d, *J* = 7.8 Hz, 1H), 7.33 (t, *J* = 7.8 Hz, 1H), 7.28-7.22 (m, 1H), 7.09 (d, *J* = 8.8 Hz, 2H), 6.82 (d, *J* = 8.8 Hz, 2H), 6.38 (s, 1H), 3.97-3.81 (m, 2H), 3.77 (s, 3H), 3.60 (s, 3H), 1.80 (s, 3H).

**<sup>13</sup>C NMR (125 MHz, CDCl<sub>3</sub>):** δ 158.7, 151.5, 141.3, 135.6, 135.5, 129.3, 127.3, 124.3, 123.1, 120.4, 115.5, 113.8, 104.2, 62.3, 60.2, 55.3, 40.9, 25.7.

**HRMS (ESI-TOF, [M + H]<sup>+</sup>):** For C<sub>20</sub>H<sub>21</sub>N<sub>2</sub>O<sub>3</sub>, 337.1552, Found: 337.1552.

**4-([1,1'-biphenyl]-4-yl)-2-methoxy-3,4-dihydropyrimido[1,6-a]indol-1(2H)-one (3ap)**

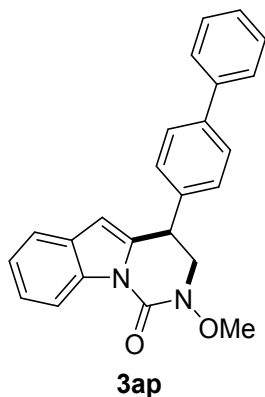

**3ap** was obtained in 86% (63.3 mg) as a white solid after column chromatography (eluent: petroleum ether/ethyl acetate = 8/1 v/v). Mp: 229-231 °C.

**<sup>1</sup>H NMR (500 MHz, CDCl<sub>3</sub>):** δ 8.47 (d, *J* = 8.3 Hz, 1H), 7.62 (t, *J* = 7.1 Hz, 4H), 7.46 (t, *J* = 7.7 Hz, 3H), 7.43 – 7.31 (m, 4H), 7.28-7.20 (m, 1H), 6.13 (s, 1H), 4.62 (dd, *J* = 9.5, 5.5 Hz, 1H), 4.00 – 3.88 (m, 2H), 3.87 (s, 3H).

**<sup>13</sup>C NMR (125 MHz, CDCl<sub>3</sub>):** δ 152.5, 141.0, 140.3, 137.3, 137.2, 135.5, 129.5, 128.8, 128.7, 127.6, 127.0, 124.3, 123.2, 120.3, 115.5, 105.3, 62.8, 54.6, 40.6.

**HRMS (ESI-TOF, [M + Na]<sup>+</sup>):** For C<sub>24</sub>H<sub>20</sub>N<sub>2</sub>NaO<sub>2</sub>, 391.1422, Found: 391.1419.

**(R)-4-cyclopropyl-2-methoxy-4-phenyl-3,4-dihydropyrimido[1,6-a]indol-1(2H)-one (3aq)**

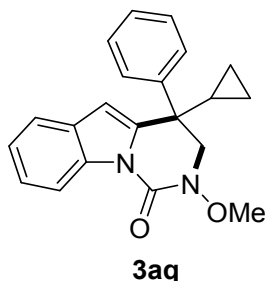

**3aq** was obtained in 88% (53.2 mg) as a white solid after column chromatography (eluent: petroleum ether/ethyl acetate = 8/1 v/v). Mp: 112-120 °C

**<sup>1</sup>H NMR (400 MHz, CDCl<sub>3</sub>):** δ 8.37 (d, *J* = 8.2 Hz, 1H), 7.48 (d, *J* = 7.8 Hz, 1H), 7.36 – 7.26 (m, 4H), 7.25 – 7.17 (m, 3H), 6.40 (s, 1H), 4.13 (d, *J* = 11.4 Hz, 1H), 3.78 (d, *J* = 11.4 Hz, 1H), 3.71 (s, 3H), 1.43 (tt, *J* = 5.5, 5.5, 8.4, 8.4 Hz, 1H), 0.70 – 0.60 (m, 1H), 0.53 (tt, *J* = 5.3, 5.3, 9.4, 9.4 Hz, 1H), 0.20 (dq, *J* = 5.5, 5.5, 5.5, 10.7 Hz, 1H), -0.01 (dq, *J* = 5.1, 5.3, 5.3, 10.1 Hz, 1H).

**<sup>13</sup>C NMR (126 MHz, CDCl<sub>3</sub>):** δ 151.62, 140.03, 139.43, 135.46, 129.15, 128.24, 127.89, 127.54, 124.36, 123.09, 120.37, 115.54, 106.11, 62.40, 58.91, 45.54, 29.70, 18.64, 2.33.

**HRMS (ESI-TOF, [M + Na]<sup>+</sup>):** For C<sub>21</sub>H<sub>20</sub>N<sub>2</sub>NaO<sub>2</sub>, 355.1417, found: 355.1419

**2-methoxy-3,4-dimethyl-4-phenyl-3,4-dihydropyrimido[1,6-*a*]indol-1(2*H*)-one (3as)**

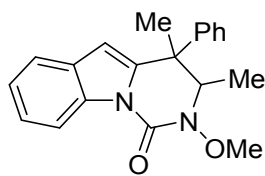

**3as**

**3as** was obtained in 36% (23.1 mg) as a colorless oil after column chromatography (eluent: petroleum ether/ethyl acetate = 8/1 v/v).

**<sup>1</sup>H NMR (500 MHz, CDCl<sub>3</sub>):** δ 8.44 (d, *J* = 8.2 Hz, 1H), 7.58 (d, *J* = 7.7 Hz, 1H), 7.38 – 7.32 (m, 1H), 7.31 – 7.26 (m, 2H), 7.26 – 7.20 (m, 2H), 7.04 (dd, *J* = 1.8, 7.2 Hz, 2H), 6.53 (s, 1H), 4.15 (q, *J* = 6.5, 6.5, 6.5 Hz, 1H), 3.36 (s, 3H), 1.75 (s, 3H), 1.30 (d, *J* = 6.5 Hz, 3H).

**<sup>13</sup>C NMR (126 MHz, CDCl<sub>3</sub>):** δ = 150.74, 145.74, 139.23, 135.46, 129.26, 128.45, 127.11, 125.67, 124.36, 123.00, 120.31, 115.50, 105.85, 77.24, 76.98, 76.73, 65.21, 62.12, 45.45, 23.69, 13.41.

**HRMS (ESI-TOF, [M + Na]<sup>+</sup>):** For C<sub>20</sub>H<sub>20</sub>N<sub>2</sub>NaO<sub>2</sub>, 343.1422, Found: 343.1424

**2-methoxy-5-methyl-4-phenyl-3,4-dihydropyrimido[1,6-*a*]indol-1(2*H*)-one (3ba)**

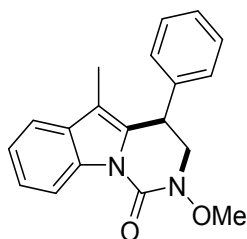

**3ba**

**3ba** was obtained in 72% (44.1 mg) as a white solid after column chromatography (eluent: petroleum ether/ethyl acetate = 8/1 v/v). Mp: 191-193 °C.

**<sup>1</sup>H NMR (500 MHz, CDCl<sub>3</sub>):** δ 8.44 (d, *J* = 8.2 Hz, 1H), 7.46 (d, *J* = 7.7 Hz, 1H), 7.38-7.25 (m, 5H), 7.18 (d, *J* = 7.1 Hz, 2H), 4.58 (t, *J* = 4.3 Hz, 1H), 4.12 (dd, *J* = 10.9, 4.8 Hz, 1H), 3.80 (dd, *J* = 10.9, 4.4 Hz, 1H), 3.65 (s, 3H), 1.94 (s, 3H).

**<sup>13</sup>C NMR (125 MHz, CDCl<sub>3</sub>):** δ 152.5, 139.8, 134.9, 130.9, 130.7, 128.8, 127.5, 124.4, 122.8, 118.3, 115.5, 112.9, 62.4, 55.0, 38.7, 8.3.

**HRMS (ESI-TOF, [M + Na]<sup>+</sup>):** For C<sub>19</sub>H<sub>18</sub>N<sub>2</sub>NaO<sub>2</sub>, 329.1266, Found: 329.1267.

### 2-methoxy-4,5-diphenyl-3,4-dihydropyrimido[1,6-*a*]indol-1(2H)-one (3ca)

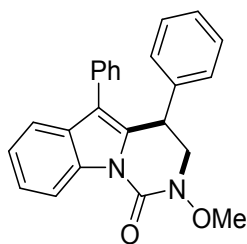

**3ca**

**3ca** was obtained in 92% (67.7 mg) as a white solid after column chromatography (eluent: petroleum ether/ethyl acetate = 8/1 v/v). Mp: 221-223 °C.

**<sup>1</sup>H NMR (400 MHz, CDCl<sub>3</sub>):** δ 8.55 (d, *J* = 8.3 Hz, 1H), 7.63 (d, *J* = 7.9 Hz, 1H), 7.41 (ddd, *J* = 1.3, 7.2, 8.4 Hz, 1H), 7.30 (dtd, *J* = 2.6, 4.2, 4.9, 8.6 Hz, 7H), 7.25 – 7.19 (m, 2H), 7.18 – 7.09 (m, 2H), 4.63 – 4.55 (m, 1H), 4.20 (dd, *J* = 4.1, 11.1 Hz, 1H), 3.78 (dd, *J* = 2.6, 11.2 Hz, 1H), 3.54 (s, 3H).

**<sup>13</sup>C NMR (125 MHz, CDCl<sub>3</sub>):** δ 151.8, 141.0, 135.3, 132.5, 130.9, 129.1, 128.8, 128.5, 127.4, 127.3, 127.2, 124.8, 123.3, 119.5, 118.7, 115.7, 62.1, 55.1, 38.3.

**HRMS (ESI-TOF, [M + Na]<sup>+</sup>):** For C<sub>24</sub>H<sub>20</sub>N<sub>2</sub>NaO<sub>2</sub>, 391.1422, Found: 391.1420.

**6-chloro-2-methoxy-4-phenyl-3,4-dihydropyrimido[1,6-*a*]indol-1(2*H*)-one (3da)**

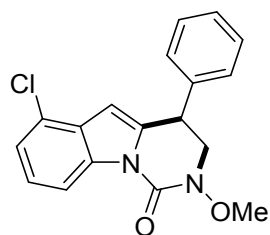

**3da**

**3da** was obtained in 72% (46.9 mg) as a white solid after column chromatography (eluent: petroleum ether/ethyl acetate = 8/1 v/v). Mp: 195-197 °C.

**<sup>1</sup>H NMR (500 MHz, CDCl<sub>3</sub>):** δ 8.35 (d, *J* = 7.1 Hz, 1H), 7.39 (m, 3H), 7.33 (d, *J* = 7.3 Hz, 2H), 7.23 (d, *J* = 7.7 Hz, 2H), 6.19 (s, 1H), 4.58 (dd, *J* = 9.6, 5.6 Hz, 1H), 3.99-3.87 (m, 2H), 3.85 (s, 3H).

**<sup>13</sup>C NMR (125 MHz, CDCl<sub>3</sub>):** δ 152.0, 138.0, 137.8, 136.1, 129.0, 128.2, 125.4, 125.0, 122.9, 114.0, 103.3, 62.8, 54.5, 40.9.

**HRMS (ESI-TOF, [M + H]<sup>+</sup>):** For C<sub>18</sub>H<sub>16</sub>ClN<sub>2</sub>O<sub>2</sub>, 327.0900, Found: 327.0904.

**2,6-dimethoxy-4-phenyl-3,4-dihydropyrimido[1,6-*a*]indol-1(2*H*)-one (3ea)**

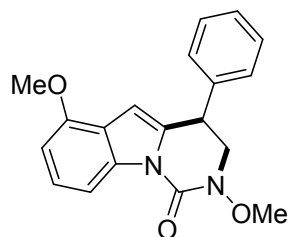

**3ea**

**3ea** was obtained in 76% (48.8 mg) as a white solid after column chromatography (eluent: petroleum ether/ethyl acetate = 8/1 v/v). Mp: 189-192 °C.

**<sup>1</sup>H NMR (500 MHz, CDCl<sub>3</sub>):** δ 8.06 (d, *J* = 8.3 Hz, 1H), 7.36 (dq, *J* = 18.7, 6.6 Hz, 5H), 7.27-7.22 (m, 1H), 6.68 (d, *J* = 8.0 Hz, 1H), 6.19 (s, 1H), 4.56 (dd, *J* = 9.7, 5.5 Hz, 1H), 3.96 – 3.87 (m, 5H), 3.85 (s, 3H).

**<sup>13</sup>C NMR (125 MHz, CDCl<sub>3</sub>):** δ 152.4, 138.3, 136.7, 135.8, 128.9, 128.3, 128.0, 125.2, 119.7, 108.6, 103.5, 102.2, 62.7, 55.3, 54.6, 40.9.

**HRMS (ESI-TOF, [M + Na]<sup>+</sup>):** For C<sub>19</sub>H<sub>18</sub>N<sub>2</sub>NaO<sub>3</sub>, 345.1215, Found: 345.1216 .

**Methyl 2-methoxy-1-oxo-4-phenyl-1,2,3,4-tetrahydropyrimido[1,6-*a*]indole-6-carboxylate (3fa)**

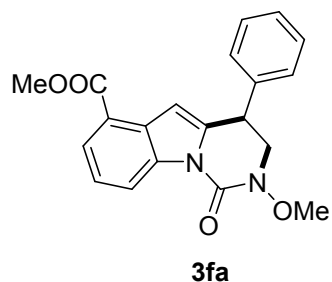

**3fa** was obtained in 70% (49.0 mg) as a white solid after column chromatography (eluent: petroleum ether/ethyl acetate = 8/1 v/v). Mp: 199-201 °C.

**<sup>1</sup>H NMR (500 MHz, CDCl<sub>3</sub>):** δ 8.68 (d, *J* = 8.2 Hz, 1H), 7.95 (d, *J* = 7.5 Hz, 1H), 7.41-7.30 (m, 6H), 6.81 (s, 1H), 4.60 (dd, *J* = 9.0, 5.6 Hz, 1H), 3.99 – 3.89 (m, 2H), 3.88 (s, 3H), 3.84 (s, 3H).

**<sup>13</sup>C NMR (125 MHz, CDCl<sub>3</sub>):** δ 167.2, 152.1, 139.2, 138.0, 136.2, 129.7, 129.0, 128.2, 128.1, 125.8, 123.6, 121.3, 120.0, 105.9, 62.7, 54.5, 51.8, 40.9.

**HRMS (ESI-TOF, [M + Na]<sup>+</sup>):** For C<sub>20</sub>H<sub>18</sub>N<sub>2</sub>NaO<sub>4</sub>, 373.1164, found: 373.1165.

**7-fluoro-2-methoxy-4-phenyl-3,4-dihydropyrimido[1,6-*a*]indol-1(2*H*)-one (3ga)**

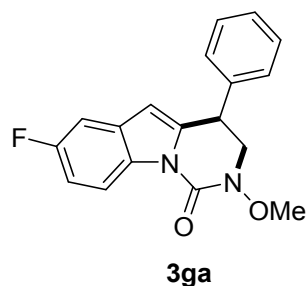

**3ga** was obtained in 53% (32.9 mg) as a white solid after column chromatography (eluent: petroleum ether/ethyl acetate = 8/1 v/v). Mp: 193-195 °C.

**<sup>1</sup>H NMR (500 MHz, CDCl<sub>3</sub>):** δ 8.39 (dd, *J* = 9.0, 4.7 Hz, 1H), 7.40 (dt, *J* = 11.6, 6.7 Hz, 3H), 7.33 (d, *J* = 6.8 Hz, 2H), 7.08 (dd, *J* = 8.8, 2.3 Hz, 1H), 7.04 (td, *J* = 9.2, 2.4 Hz, 1H), 6.03 (s, 1H), 4.57 (dd, *J* = 9.6, 5.5 Hz, 1H), 3.98 – 3.87 (m, 2H), 3.85 (s, 3H).

**<sup>13</sup>C NMR (125 MHz, CDCl<sub>3</sub>):** δ 159.5 (d, *J* = 239.2 Hz), 152.3, 138.9, 138.0, 131.8, 130.4 (d, *J* = 9.2 Hz), 129.0, 1228.2, 116.4 (d, *J* = 7.7 Hz), 112.0 (d, *J* = 24.8 Hz), 105.8 (d, *J* = 23.9 Hz), 104.9, 62.8, 54.6, 40.9.



**HRMS (ESI-TOF, [M + H]<sup>+</sup>):** For C<sub>18</sub>H<sub>16</sub>FN<sub>2</sub>O<sub>2</sub>, 311.1196, found: 311.1201.

**7-chloro-2-methoxy-4-phenyl-3,4-dihydropyrimido[1,6-a]indol-1(2H)-one (3ha)**

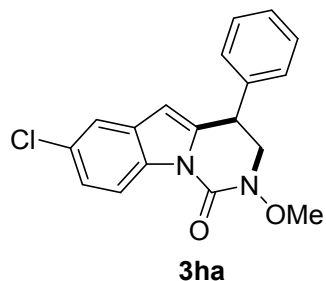

**3ha** was obtained in 65% (42.3 mg) as a white solid after column chromatography (eluent: petroleum ether/ethyl acetate = 8/1 v/v). Mp: 205-207 °C.

**<sup>1</sup>H NMR (500 MHz, CDCl<sub>3</sub>):** δ 8.36 (d, *J* = 8.8 Hz, 1H), 7.46-7.33 (m, 4H), 7.34-7.30 (m, 2H), 7.29-7.23 (m, 1H), 6.00 (s, 1H), 4.56 (dd, *J* = 9.1, 5.6 Hz, 1H), 3.98-3.85 (m, 2H), 3.85 (s, 3H).

**<sup>13</sup>C NMR (125 MHz, CDCl<sub>3</sub>):** δ 152.1, 138.7, 137.9, 133.8, 130.7, 129.0, 128.7, 128.2, 124.4, 119.8, 116.4, 104.4, 62.8, 54.5, 40.9.

**HRMS (ESI-TOF, [M + H]<sup>+</sup>):** For C<sub>18</sub>H<sub>16</sub>ClN<sub>2</sub>O<sub>2</sub>, 327.0900, found: 327.0904.

**7-bromo-2-methoxy-4-phenyl-3,4-dihydropyrimido[1,6-a]indol-1(2H)-one (3ia)**

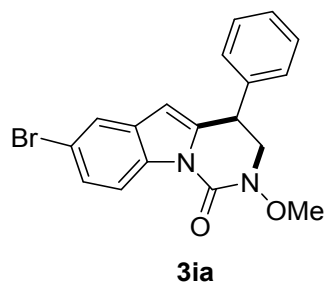

**3ia** was obtained in 74% (54.9 mg) as a white solid after column chromatography (eluent: petroleum ether/ethyl acetate = 8/1 v/v). Mp: 211-213 °C.

**<sup>1</sup>H NMR (500 MHz, CDCl<sub>3</sub>):** δ 8.31 (d, *J* = 8.8 Hz, 1H), 7.55 (s, 1H), 7.43-7.35 (m, 4H), 7.31 (d, *J* = 6.9 Hz, 2H), 6.00 (s, 1H), 4.56 (dd, *J* = 9.8, 5.6 Hz, 1H), 3.97-3.86 (m, 2H), 3.84 (s, 3H).

**<sup>13</sup>C NMR (125 MHz, CDCl<sub>3</sub>):** δ 156.2, 152.5, 138.4, 137.9, 130.4, 130.1, 128.9, 128.2, 128.0, 116.1, 112.7, 105.0, 103.1, 62.7, 55.6, 54.8, 40.9.

**HRMS (ESI-TOF, [M + Na]<sup>+</sup>):** For C<sub>18</sub>H<sub>15</sub>BrN<sub>2</sub>NaO<sub>2</sub>, 371.0395, found: 371.0397.

**7-iodo-2-methoxy-4-phenyl-3,4-dihydropyrimido[1,6-*a*]indol-1(2*H*)-one (3ja)**

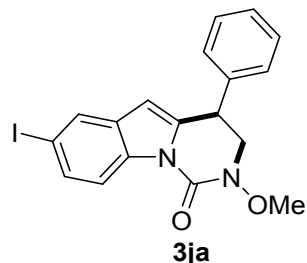

**3ja** was obtained in 56% (22.2 mg) as a white solid after column chromatography (eluent: petroleum ether/ethyl acetate = 8/1 v/v). Mp: 209-211 °C.

**<sup>1</sup>H NMR (500 MHz, CDCl<sub>3</sub>):** δ 8.19 (d, *J* = 8.7 Hz, 1H), 7.75 (d, *J* = 1.3 Hz, 1H), 7.57 (dd, *J* = 8.7, 1.5 Hz, 1H), 7.44 – 7.34 (m, 3H), 7.30 (d, *J* = 6.5 Hz, 2H), 5.97 (s, 1H), 4.55 (dd, *J* = 9.1, 5.6 Hz, 1H), 3.96 – 3.84 (m, 2H), 3.84 (s, 3H).

**<sup>13</sup>C NMR (125 MHz, CDCl<sub>3</sub>):** δ 152.0, 138.2, 137.9, 134.7, 132.7, 131.8, 129.0, 128.2, 117.3, 104.1, 87.2, 62.7, 54.5, 40.8.

**HRMS (ESI-TOF, [M + H]<sup>+</sup>):** For C<sub>18</sub>H<sub>16</sub>IN<sub>2</sub>O<sub>2</sub>, 419.0256, found: 419.0255.

**2-methoxy-7-methyl-4-phenyl-3,4-dihydropyrimido[1,6-*a*]indol-1(2*H*)-one (3ka)**

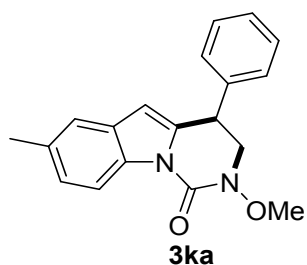

**3kq** was obtained in 76% (46.5 mg) as a white solid after column chromatography (eluent: petroleum ether/ethyl acetate = 8/1 v/v). Mp: 188-200 °C.

**<sup>1</sup>H NMR (500 MHz, CDCl<sub>3</sub>):** δ 8.30 (d, *J* = 8.4 Hz, 1H), 7.38 (m, 3H), 7.34-7.30 (m, 2H), 7.22 (s, 1H), 7.14 (d, *J* = 8.4 Hz, 1H), 5.99 (s, 1H), 4.55 (dd, *J* = 9.2, 5.5 Hz, 1H), 3.96-3.84 (m, 2H), 3.84 (s, 3H), 2.42 (s, 3H).

**<sup>13</sup>C NMR (125 MHz, CDCl<sub>3</sub>):** δ 152.6, 138.5, 137.2, 133.6, 132.6, 129.7, 128.9, 128.2, 128.0, 125.6, 120.2, 115.1, 104.9, 62.7, 54.7, 40.9, 21.4.

**HRMS (ESI-TOF, [M + Na]<sup>+</sup>):** For C<sub>19</sub>H<sub>18</sub>N<sub>2</sub>NaO<sub>2</sub>, 329.1266, found: 329.1269.

**2,7-dimethoxy-4-phenyl-3,4-dihydropyrimido[1,6-a]indol-1(2H)-one (3la)**

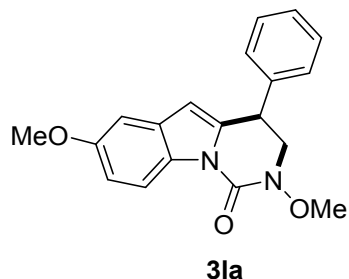

**3la** was obtained in 75% (48.3 mg) as a white solid after column chromatography (eluent: petroleum ether/ethyl acetate = 8/1 v/v). Mp: 191-193 °C.

**<sup>1</sup>H NMR (500 MHz, CDCl<sub>3</sub>):** δ 8.32 (d, *J* = 9.0 Hz, 1H), 7.42-7.30 (m, 5H), 6.93 (dd, *J* = 9.0, 2.4 Hz, 1H), 6.90 (d, *J* = 2.2 Hz, 1H), 5.99 (s, 1H), 4.55 (dd, *J* = 9.8, 5.4 Hz, 1H), 3.95-3.85 (m, 2H), 3.84 (s, 3H), 3.82 (s, 3H).

**<sup>13</sup>C NMR (125 MHz, CDCl<sub>3</sub>):** δ 156.2, 152.5, 138.4, 137.9, 130.4, 130.1, 128.9, 128.2, 128.02, 116.2, 112.7, 105.0, 103.1, 62.8, 55.6, 54.8, 40.9.

**HRMS (ESI-TOF, [M + Na]<sup>+</sup>):** For C<sub>19</sub>H<sub>18</sub>N<sub>2</sub>NaO<sub>3</sub>, 345.1215, found: 345.1218.

**methyl 2-methoxy-1-oxo-4-phenyl-1,2,3,4-tetrahydropyrimido[1,6-a]indole-7-carboxylate (3ma)**

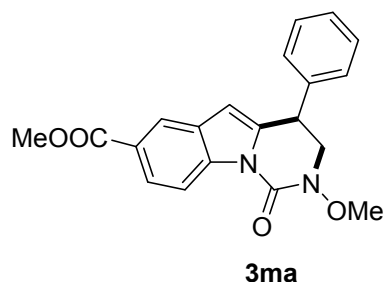

**3ma** was obtained in 47% (32,9 mg) as a white solid after column chromatography (eluent: petroleum ether/ethyl acetate = 8/1 v/v). Mp: 191-193 °C.

**<sup>1</sup>H NMR (500 MHz, CDCl<sub>3</sub>):** δ 8.47 (d, *J* = 8.7 Hz, 1H), 8.16 (s, 1H), 8.01 (dd, *J* = 8.7, 1.4 Hz, 1H), 7.39 (m, 3H), 7.35-7.30 (m, 2H), 6.13 (s, 1H), 4.59 (dd, *J* = 9.2, 5.7 Hz, 1H), 3.99-3.87 (m, 5H), 3.85 (s, 3H).

$^{13}\text{C}$  NMR (125 MHz,  $\text{CDCl}_3$ ):  $\delta$  167.4, 151.9, 138.7, 138.1, 137.8, 129.3, 129.0, 128.2, 125.6, 125.1, 122.6, 115.1, 105.5, 62.8, 54.4, 52.0, 40.9.

HRMS (ESI-TOF,  $[\text{M} + \text{Na}]^+$ ): For  $\text{C}_{20}\text{H}_{18}\text{N}_2\text{NaO}_4$ , 373.1164, found: 373.1161.

**2-methoxy-1-oxo-4-phenyl-1,2,3,4-tetrahydropyrimido[1,6-*a*]indole-7-carbonitrile (3na)**

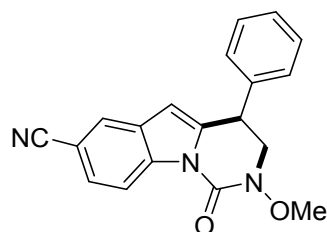

**3na**

**3na** was obtained in 36% (22.8 mg) as a white solid after column chromatography (eluent: petroleum ether/ethyl acetate = 4/1 v/v). Mp: 209-211 °C.

$^1\text{H}$  NMR (500 MHz,  $\text{CDCl}_3$ ):  $\delta$  8.54 (d,  $J = 8.6$  Hz, 1H), 7.76 (s, 1H), 7.56 (dd,  $J = 8.6, 1.4$  Hz, 1H), 7.45 – 7.39 (m, 3H), 7.35 – 7.32 (m, 2H), 6.13 (s, 1H), 4.61 (dd,  $J = 9.9, 5.8$  Hz, 1H), 4.00 – 3.91 (m, 2H), 3.87 (s, 3H).

$^{13}\text{C}$  NMR (125 MHz,  $\text{CDCl}_3$ ):  $\delta$  151.5, 139.8, 137.3, 129.5, 129.1, 128.4, 128.2, 127.4, 125.1, 119.7, 116.3, 106.4, 104.7, 62.8, 54.2, 40.8.

HRMS (ESI-TOF,  $[\text{M} + \text{H}]^+$ ): For  $\text{C}_{19}\text{H}_{16}\text{N}_3\text{O}_2$ , 318.1243, found: 318.1247.

**2-methoxy-7-nitro-4-phenyl-3,4-dihydropyrimido[1,6-*a*]indol-1(2*H*)-one (3oa)**

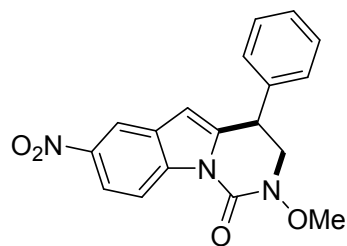

**3oa**

**3oa** was obtained in 50% (33.7 mg) as a white solid after column chromatography (eluent: petroleum ether/ethyl acetate = 4/1 v/v). Mp: 219-221 °C.

**<sup>1</sup>H NMR (500 MHz, CDCl<sub>3</sub>):**  $\delta$  8.53 (d,  $J$  = 9.1 Hz, 1H), 8.33 (d,  $J$  = 1.9 Hz, 1H), 8.19 (dd,  $J$  = 9.1, 2.0 Hz, 1H), 7.42 (m, 3H), 7.34 (d,  $J$  = 6.8 Hz, 2H), 6.20 (s, 1H), 4.62 (dd,  $J$  = 9.3, 6.0 Hz, 1H), 4.03 – 3.93 (m, 2H), 3.87 (s, 3H).

**<sup>13</sup>C NMR (125 MHz, CDCl<sub>3</sub>):**  $\delta$  151.3, 144.0, 140.6, 138.6, 137.2, 129.3, 129.2, 128.5, 128.2, 119.5, 116.5, 115.6, 105.6, 62.8, 54.2, 40.9.

**HRMS (ESI-TOF, [M + H]<sup>+</sup>):** For C<sub>18</sub>H<sub>16</sub>N<sub>3</sub>O<sub>4</sub>, 338.1141, found: 338.1143.

### 8-bromo-2-methoxy-4-phenyl-3,4-dihydropyrimido[1,6-*a*]indol-1(2*H*)-one (3pa)

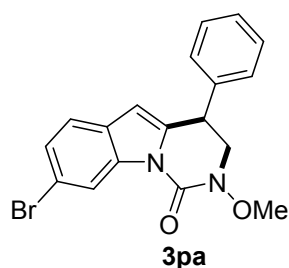

**3pa** was obtained in 73% (54.2 mg) as a white solid after column chromatography (eluent: petroleum ether/ethyl acetate = 8/1 v/v). Mp: 193-195 °C.

**<sup>1</sup>H NMR (500 MHz, CDCl<sub>3</sub>):**  $\delta$  8.64 (s, 1H), 7.43-7.29 (m, 6H), 7.27 (d,  $J$  = 11.9 Hz, 1H), 6.02 (s, 1H), 4.54 (dd,  $J$  = 9.8, 5.6 Hz, 1H), 3.97-3.86 (m, 2H), 3.85 (s, 3H).

**<sup>13</sup>C NMR (125 MHz, CDCl<sub>3</sub>):**  $\delta$  151.9, 137.9, 136.0, 129.0, 128.3, 128.2, 126.4, 121.3, 118.5, 117.8, 104.9, 62.7, 54.5, 40.9.

**HRMS (ESI-TOF, [M + H]<sup>+</sup>):** For C<sub>18</sub>H<sub>16</sub>BrN<sub>2</sub>O<sub>2</sub>, 371.0395, found: 371.0397.

### 8-chloro-2-methoxy-4-phenyl-3,4-dihydropyrimido[1,6-*a*]indol-1(2*H*)-one (3qa)

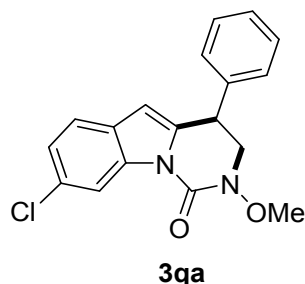

**3qa** was obtained in 64% (41.9 mg) as a white solid after column chromatography (eluent: petroleum ether/ethyl acetate = 8/1 v/v). Mp: 183-185 °C.

**<sup>1</sup>H NMR (500 MHz, CDCl<sub>3</sub>):** δ 8.47 (s, 1H), 7.39 (m, 3H), 7.31 (d, *J* = 8.1 Hz, 3H), 7.18 (dd, *J* = 8.3, 1.8 Hz, 1H), 6.02 (s, 1H), 4.55 (dd, *J* = 9.5, 5.4 Hz, 1H), 3.98 – 3.85 (m, 2H), 3.84 (s, 3H).

**<sup>13</sup>C NMR (125 MHz, CDCl<sub>3</sub>):** δ 152.0, 138.0, 135.7, 130.0, 129.0, 128.2, 128.0, 123.7, 120.9, 115.6, 104.8, 62.7, 54.5, 40.8.

**HRMS (ESI-TOF, [M + H]<sup>+</sup>):** For C<sub>18</sub>H<sub>16</sub>ClN<sub>2</sub>O<sub>2</sub>, 327.0900, found: 327.0901.

**methyl(2*R*)-2-(1,3-dioxoisindolin-2-yl)-3-(2-methoxy-1-oxo-4-phenyl-1,2,3,4-tetrahydropyrimido[1,6-*a*]indol-5-yl)propanoate (3ra)**

**methyl(2*R*)-2-(1,3-dioxoisindolin-2-yl)-3-(2-methoxy-1-oxo-3-phenyl-1,2,3,4-tetrahydropyrimido[1,6-*a*]indol-5-yl)propanoate (3ra')**

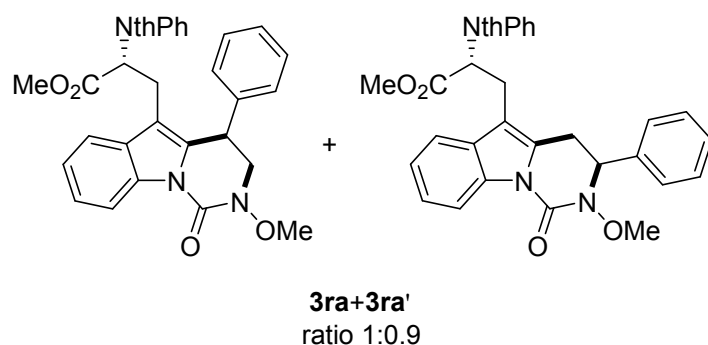

**3ra** and **3ra'** were obtained in 91% (95.1 mg) as white solid after column chromatography (eluent: petroleum ether/ethyl acetate = 4/1 v/v). Mp: 261-263 °C.

**<sup>1</sup>H NMR (500 MHz, CDCl<sub>3</sub>):** δ 8.38 (dd, *J* = 13.5, 8.3 Hz, 1.91H), 7.75 (dd, *J* = 5.4, 3.1 Hz, 1.88H), 7.69 (dd, *J* = 5.4, 3.0 Hz, 1.87H), 7.61 (s, 3.98H), 7.55 (d, *J* = 7.7 Hz, 1.16H), 7.45 (d, *J* = 7.8 Hz, 1.02H), 7.27 (tq, *J* = 22.3, 7.2 Hz, 6.55H), 7.11 (dt, *J* = 34.5, 7.3 Hz, 6.81H), 7.00 (t, *J* = 6.5 Hz, 1.09H), 5.11 (dd, *J* = 9.4, 5.6 Hz, 0.99H), 5.04 (dd, *J* = 9.8, 6.4 Hz, 0.91H), 4.78 (t, *J* = 4.1 Hz, 1.01H), 4.64 – 4.57 (m, 0.90H), 4.15 (dd, *J* = 11.1, 4.4 Hz, 1.01H), 3.84 (dd, *J* = 11.0, 4.6 Hz, 1.06H), 3.71 (s, 3.09H), 3.70 (s, 3.16H), 3.54 (s, 3.00H), 3.52 (s, 3.25H), 3.49 – 3.30 (m, 4.14H).

**<sup>13</sup>C NMR (126 MHz, CDCl<sub>3</sub>):** δ 169.1, 169.1, 167.4, 151.9, 151.9, 140.0, 139.6, 135.1, 135.0, 134.3, 133.9, 133.1, 132.8, 131.5, 131.5, 129.6, 129.3, 128.9, 128.6, 127.6, 127.5, 127.4, 127.3, 124.6, 123.5, 123.1, 123.1, 118.4, 118.3, 115.7, 115.6, 112.1, 62.2, 62.2, 55.3, 54.8, 52.9, 52.9, 51.3, 38.4, 37.9, 23.9, 23.8.

**HRMS (ESI-TOF, [M + Na]<sup>+</sup>):** For C<sub>30</sub>H<sub>25</sub>N<sub>3</sub>NaO<sub>6</sub>, 546.1641, found: 546.1644.

**2-methoxy-4,5-diphenyl-7-(1*H*-pyrazol-1-yl)-3,4-dihydropyrimido[1,6-*a*]indol-1(2*H*)-one (3sa)**

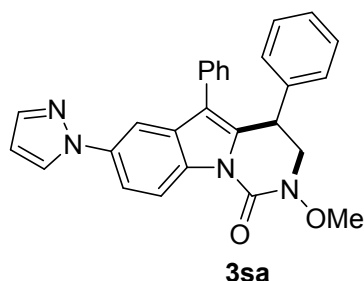

**3sa** was obtained in 68% (59.6 mg) as a white solid after column chromatography (eluent: petroleum ether/ethyl acetate = 4/1 v/v). Mp: 254-256 °C.

**<sup>1</sup>H NMR (500 MHz, CDCl<sub>3</sub>):**  $\delta$  8.60 (d, *J* = 8.9 Hz, 1H), 7.92 (dd, *J* = 11.0, 1.8 Hz, 3H), 7.71 (d, *J* = 9.6 Hz, 2H), 7.36-7.27 (m, 9H), 7.22 (d, *J* = 7.9 Hz, 2H), 7.13 (d, *J* = 7.8 Hz, 2H), 6.46 (s, 1H), 4.60 (s, 1H), 4.24 (dd, *J* = 11.2, 4.0 Hz, 1H), 3.80 (dd, *J* = 11.2, 2.3 Hz, 1H), 3.56 (s, 3H).

**<sup>13</sup>C NMR (125 MHz, CDCl<sub>3</sub>):**  $\delta$  151.5, 140.8, 136.6, 133.6, 132.5, 132.0, 130.0, 129.1, 128.9, 128.7, 127.5, 127.4, 127.3, 118.9, 117.0, 116.3, 110.6, 110.0, 107.3, 62.2, 55.1, 38.4.

**HRMS (ESI-TOF, [M + Na]<sup>+</sup>):** For C<sub>27</sub>H<sub>22</sub>N<sub>4</sub>NaO<sub>2</sub>, 457.1640, found: 457.1638.

**5-cyclopropyl-2-methoxy-4-phenyl-3,4-dihydropyrimido[1,6-*a*]indol-1(2*H*)-one (3ta)**

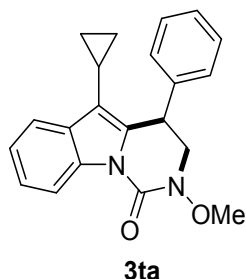

**3ta** was obtained in 87% (57.8 mg) as a white solid after column chromatography (eluent: petroleum ether/ethyl acetate = 8/1 v/v). Mp: 213-215°C.

**<sup>1</sup>H NMR (500 MHz, CDCl<sub>3</sub>):** δ 8.50 (d, *J* = 7.2 Hz, 1H), 7.67 (t, *J* = 6.4 Hz, 1H), 7.29 – 7.40 (m, 6H), 7.20 (d, *J* = 6.3 Hz, 2H), 4.76 (s, 1H), 4.17 – 4.21 (m, 1H), 3.80–3.83 (m, 1H), 3.64 (s, 1H), 1.53 – 1.54 (m, 1H), 0.75 – 0.79 (m, 1H), 0.56 – 0.57 (m, 3H).

**<sup>13</sup>C NMR (125 MHz, CDCl<sub>3</sub>):** δ 152.3, 140.5, 134.9, 132.6, 130.6, 128.7, 127.5, 127.4, 124.3, 122.9, 119.2, 117.7, 115.7, 100.0, 62.3, 55.1, 38.7, 5.4, 4.9, 4.6.

**HRMS (ESI-TOF, [M + Na]<sup>+</sup>):** For C<sub>21</sub>H<sub>20</sub>N<sub>2</sub>NaO<sub>2</sub>, 355.1422, found: 355.1425.

### 2-methoxy-9-methyl-4-phenyl-2,3,4,9-tetrahydro-1*H*-pyrido[3,4-*b*]indol-1-one

(**1ua**)

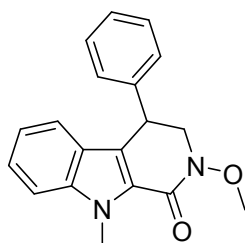

**3ua**

**1ua** was obtained in 15% (9.2 mg) as a yellow oil after column chromatography (eluent: petroleum ether/ethyl acetate = 8/1 v/v).

**<sup>1</sup>H NMR (500 MHz, CDCl<sub>3</sub>):** δ 7.38 (d, *J* = 8.5 Hz, 1H), 7.36 – 7.27 (m, 5H), 6.99 – 6.91 (m, 2H), 4.61 (dd, *J* = 6.0, 8.3 Hz, 1H), 4.18 (s, 3H), 4.12 (dd, *J* = 6.0, 11.1 Hz, 1H), 3.86 (dd, *J* = 8.3, 11.1 Hz, 1H), 3.78 (s, 3H).

**<sup>13</sup>C NMR (126 MHz, CDCl<sub>3</sub>):** δ 162.86, 140.47, 140.05, 128.74, 128.22, 127.52, 125.42, 125.02, 123.54, 121.25, 120.97, 120.27, 110.30, 100.00, 77.28, 77.02, 76.77, 62.42, 57.81, 39.87, 31.41.

**HRMS (ESI-TOF, [M + Na]<sup>+</sup>):** For C<sub>19</sub>H<sub>18</sub>N<sub>2</sub>NaO<sub>2</sub>, 329.1266, found: 329.1269

### 2-methoxy-9-methyl-3-phenyl-2,3,4,9-tetrahydro-1*H*-pyrido[3,4-*b*]indol-1-one

(**3ua'**)



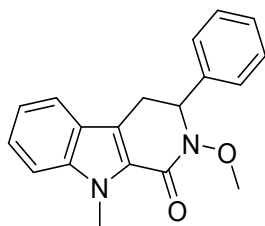

**3ua'**

**1ua'** was obtained in 13% (8.0 mg) as a yellow oil after column chromatography (eluent: petroleum ether/ethyl acetate = 8/1 v/v).

**<sup>1</sup>H NMR (500 MHz, CDCl<sub>3</sub>):**  $\delta$  7.50 (d,  $J$  = 8.0 Hz, 1H), 7.39 (t,  $J$  = 8.2, 8.2 Hz, 3H), 7.36 – 7.31 (m, 2H), 7.29 (d,  $J$  = 7.2 Hz, 1H), 7.13 (ddd,  $J$  = 1.3, 6.5, 7.9 Hz, 1H), 5.16 (t,  $J$  = 6.8, 6.8 Hz, 1H), 4.16 (s, 3H), 3.77 (s, 3H), 3.56 (dd,  $J$  = 6.5, 16.2 Hz, 1H), 3.42 (dd,  $J$  = 7.1, 16.2 Hz, 1H).

**<sup>13</sup>C NMR (126 MHz, CDCl<sub>3</sub>):**  $\delta$  163.68, 139.94, 139.71, 128.50, 127.95, 127.09, 125.14, 123.94, 120.34, 120.25, 116.84, 110.33, 77.27, 77.02, 76.76, 65.41, 63.36, 31.36, 29.56.

**HRMS (ESI-TOF, [M + Na]<sup>+</sup>):** For C<sub>19</sub>H<sub>18</sub>N<sub>2</sub>NaO<sub>2</sub>, 329.1266, found: 329.1269

**7-bromo-2-methoxy-9-methyl-4-phenyl-2,3,4,9-tetrahydro-1H-pyrido[3,4-*b*]indol-1-one (3ra)**

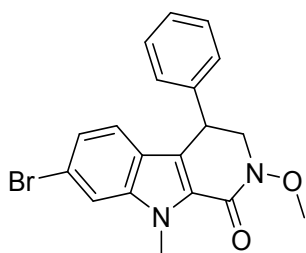

**3va**

**3va** was obtained in 21% (16.2 mg) as a yellow solid after column chromatography (eluent: petroleum ether/ethyl acetate = 8/1 v/v). Mp: 185-187 °C.

**<sup>1</sup>H NMR (500 MHz, CDCl<sub>3</sub>):**  $\delta$  7.58 (d,  $J$  = 1.7 Hz, 1H), 7.42 – 7.28 (m, 5H), 7.08 (dd,  $J$  = 1.7, 8.6 Hz, 1H), 6.79 (d,  $J$  = 8.5 Hz, 1H), 4.62 (dd,  $J$  = 6.0, 8.7 Hz, 1H), 4.18 (s, 3H), 4.13 (dd,  $J$  = 6.0, 11.1 Hz, 1H), 3.89 (dd,  $J$  = 8.8, 11.2 Hz, 1H), 3.83 (s, 3H).

**<sup>13</sup>C NMR (126 MHz, CDCl<sub>3</sub>):**  $\delta$  162.44, 140.67, 140.07, 128.84, 128.19, 127.71, 125.94, 123.81, 122.47, 122.34, 121.10, 119.03, 113.38, 77.28, 77.03, 76.77, 62.46, 57.67, 39.81, 31.56.

**HRMS (ESI-TOF, [M + Na]<sup>+</sup>):** For C<sub>19</sub>H<sub>17</sub>BrN<sub>2</sub>NaO<sub>2</sub>, 407.0371, found: 407.0374.

**4-phenyl-3,4-dihydropyrimido[1,6-*a*]indol-1(2*H*)-one (4)**

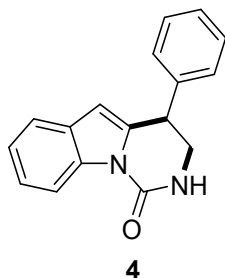

**4** was obtained in 88% (23.1 mg) as a white solid after column chromatography (eluent: petroleum ether/ethyl acetate = 2/1 v/v). Mp: 175-177 °C.

**<sup>1</sup>H NMR (500 MHz, CDCl<sub>3</sub>):**  $\delta$  8.40 (s, 1H), 7.46 (d, *J* = 7.7 Hz, 1H), 7.36 (m, 7H) 7.22 (t, *J* = 7.4 Hz, 1H), 4.43 (s, 1H), 3.67 (s, 2H).

**<sup>13</sup>C NMR (126 MHz, CDCl<sub>3</sub>):**  $\delta$  138.55, 138.34, 135.43, 129.00, 128.84, 128.35, 127.84, 123.91, 122.80, 120.15, 115.23, 104.79, 77.25, 76.99, 76.74, 46.53, 40.73.

**HRMS (ESI-TOF, [M + Na]<sup>+</sup>):** For C<sub>17</sub>H<sub>14</sub>N<sub>2</sub>NaO, 285.1004, found: 285.1005.

ZMH-A-3AA/1  
ZMH-A-3AA

1H 1D 2018 04

8.46  
8.44  
7.44  
7.43  
7.41  
7.40  
7.38  
7.37  
7.36  
7.34  
7.32  
7.31  
7.26  
7.24  
7.22  
7.21  
6.07  
4.59  
4.58  
4.57  
4.56  
3.96  
3.94  
3.93  
3.92  
3.90  
3.88  
3.86  
3.85

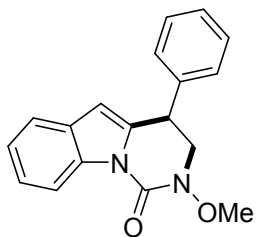

3aa

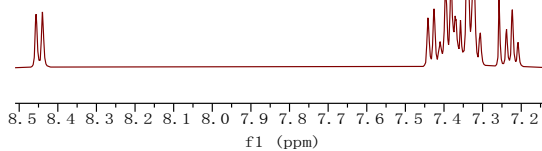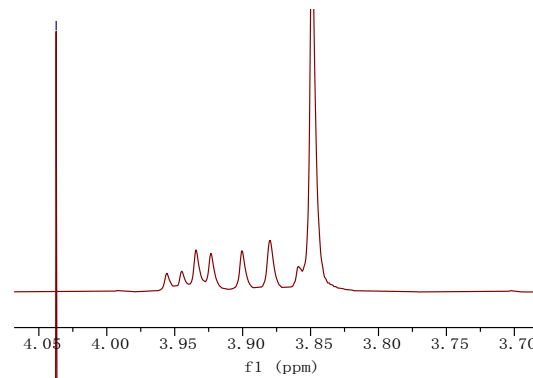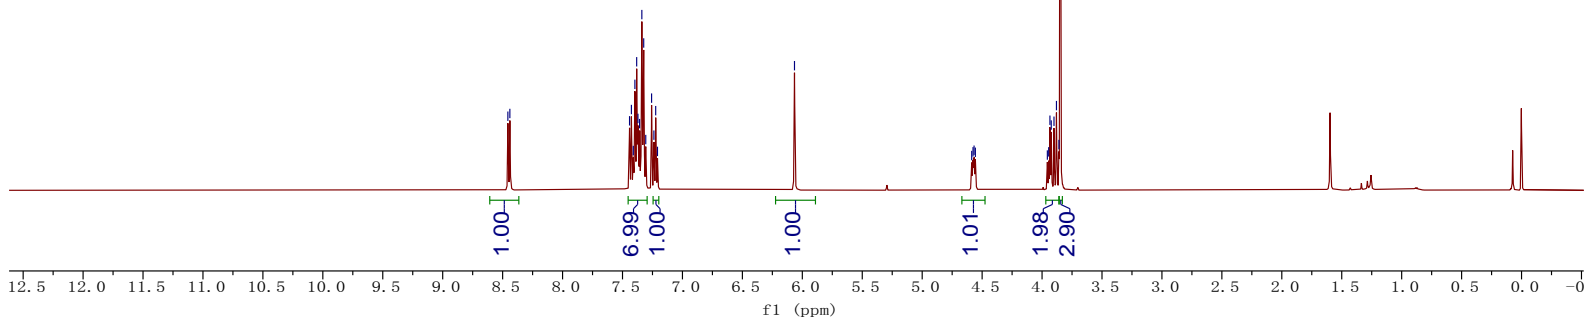

ZMH-A-3AA/2  
ZMH-A-3AA

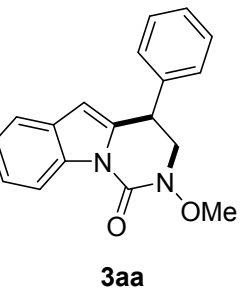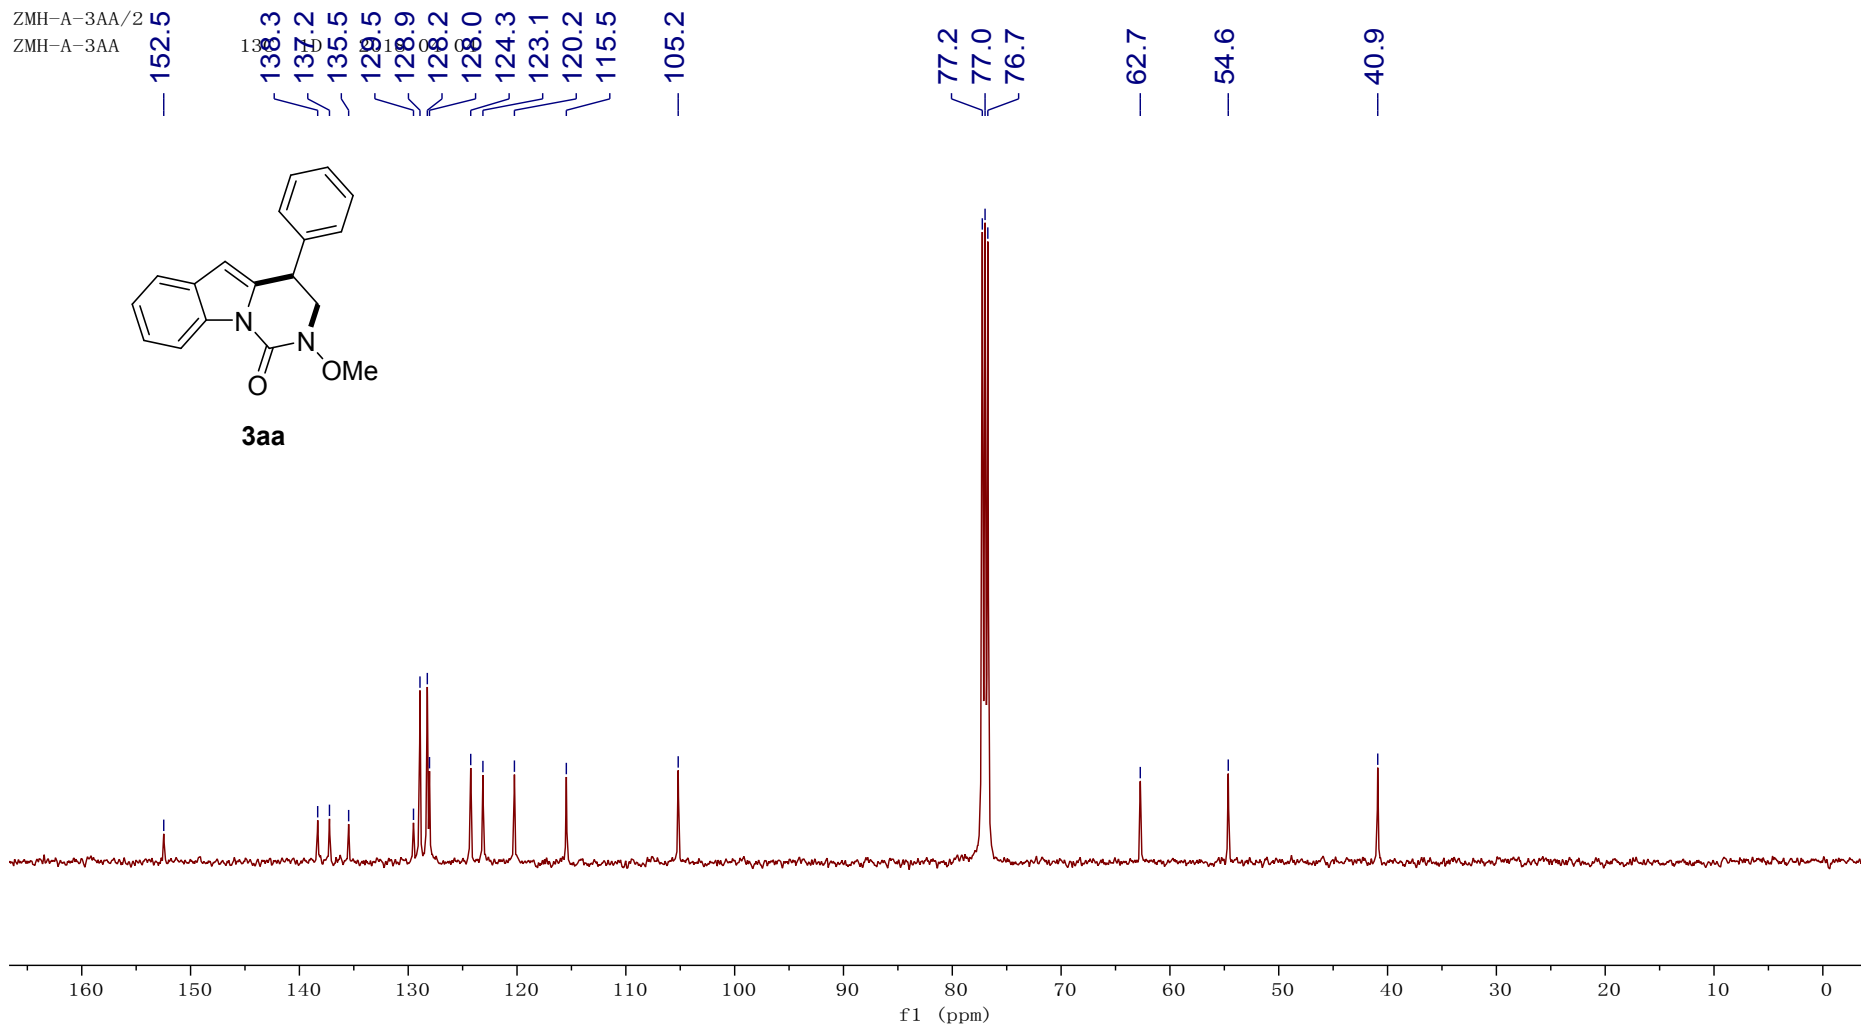

ZMH-A-3AD/1  
ZMH-A-3AD

1H 1D 2018 08  
8.45  
8.43  
7.45  
7.43  
7.34  
7.33  
7.31  
7.30  
7.29  
7.26  
7.24  
7.23  
7.21  
7.10  
7.09  
7.07  
6.06

4.58  
4.57  
4.56  
4.55  
3.94  
3.93  
3.92  
3.91  
3.85  
3.83  
3.81

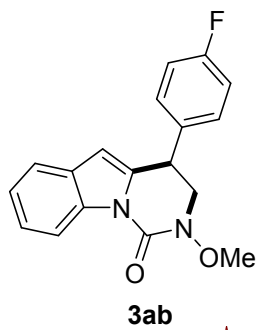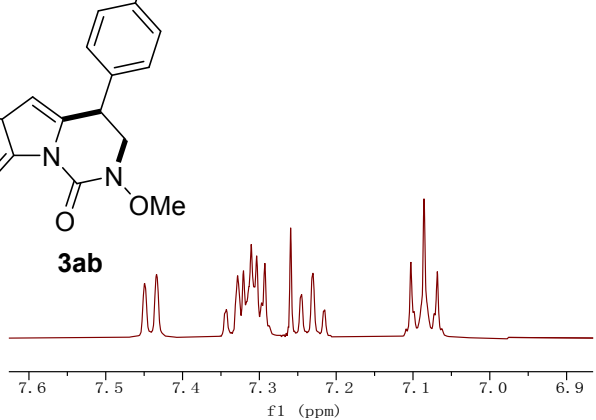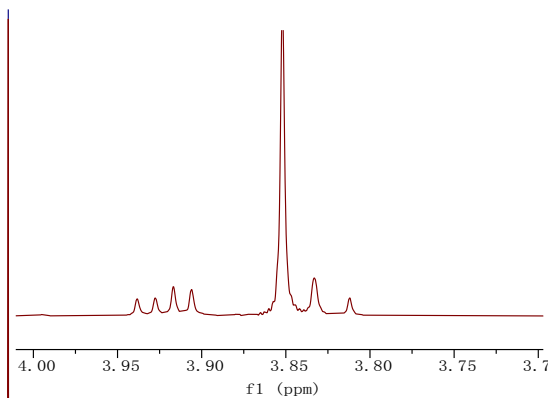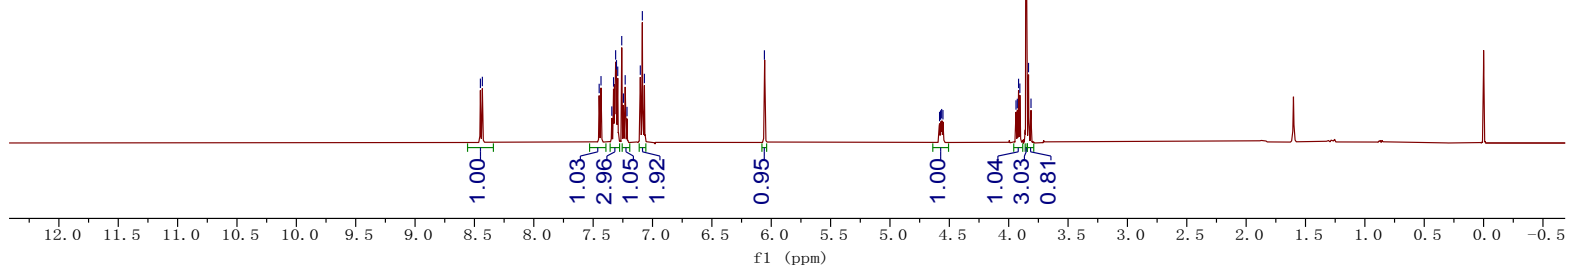

ZMH-A-3A  
ZMH-A-3A

169.2  
161.4  
152.4  
137.0  
135.5  
131.1  
129.8  
129.4  
124.4  
123.2  
120.3  
116.0  
115.8  
115.5  
105.2

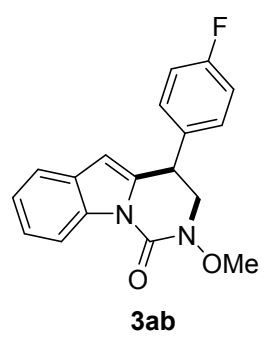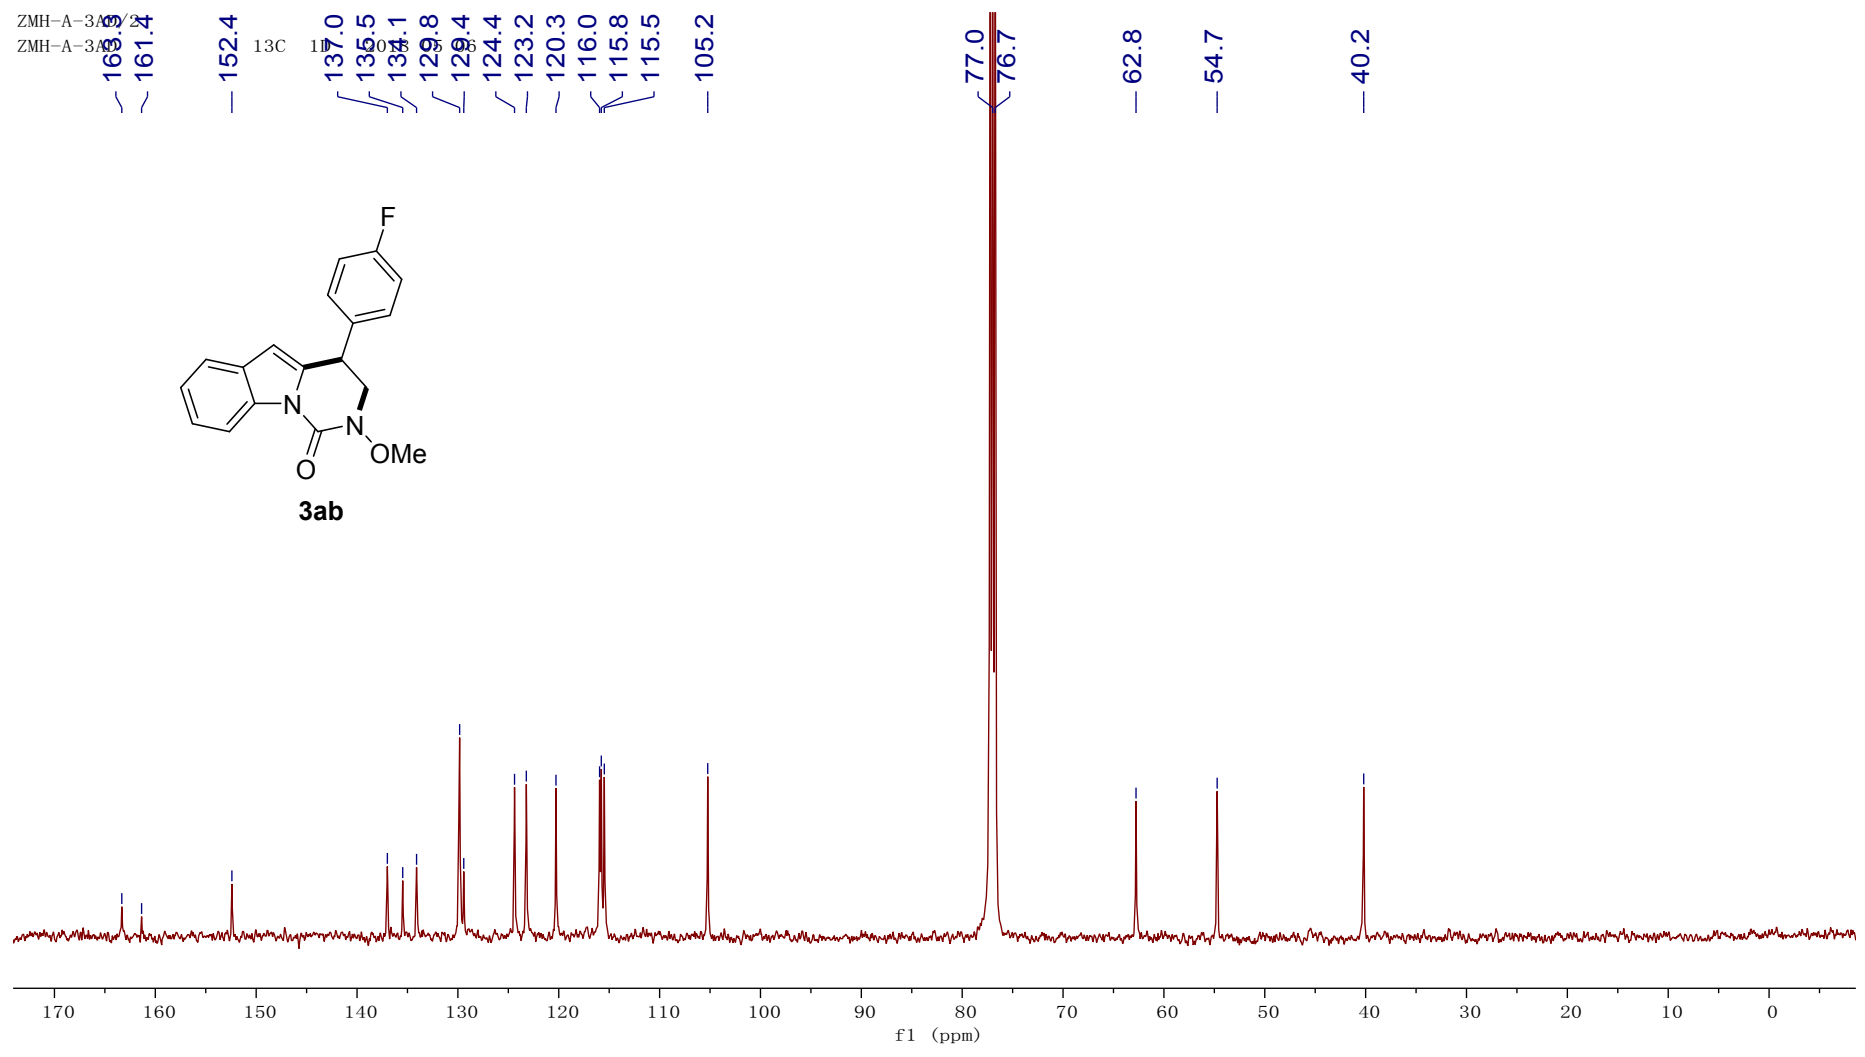

ZMH-A-3AE/1  
ZMH-A-3AE

1H 1D 2018 05 08

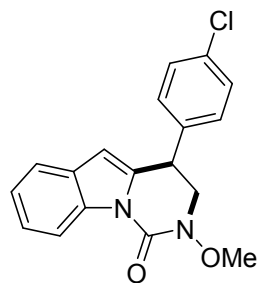

**3ac**

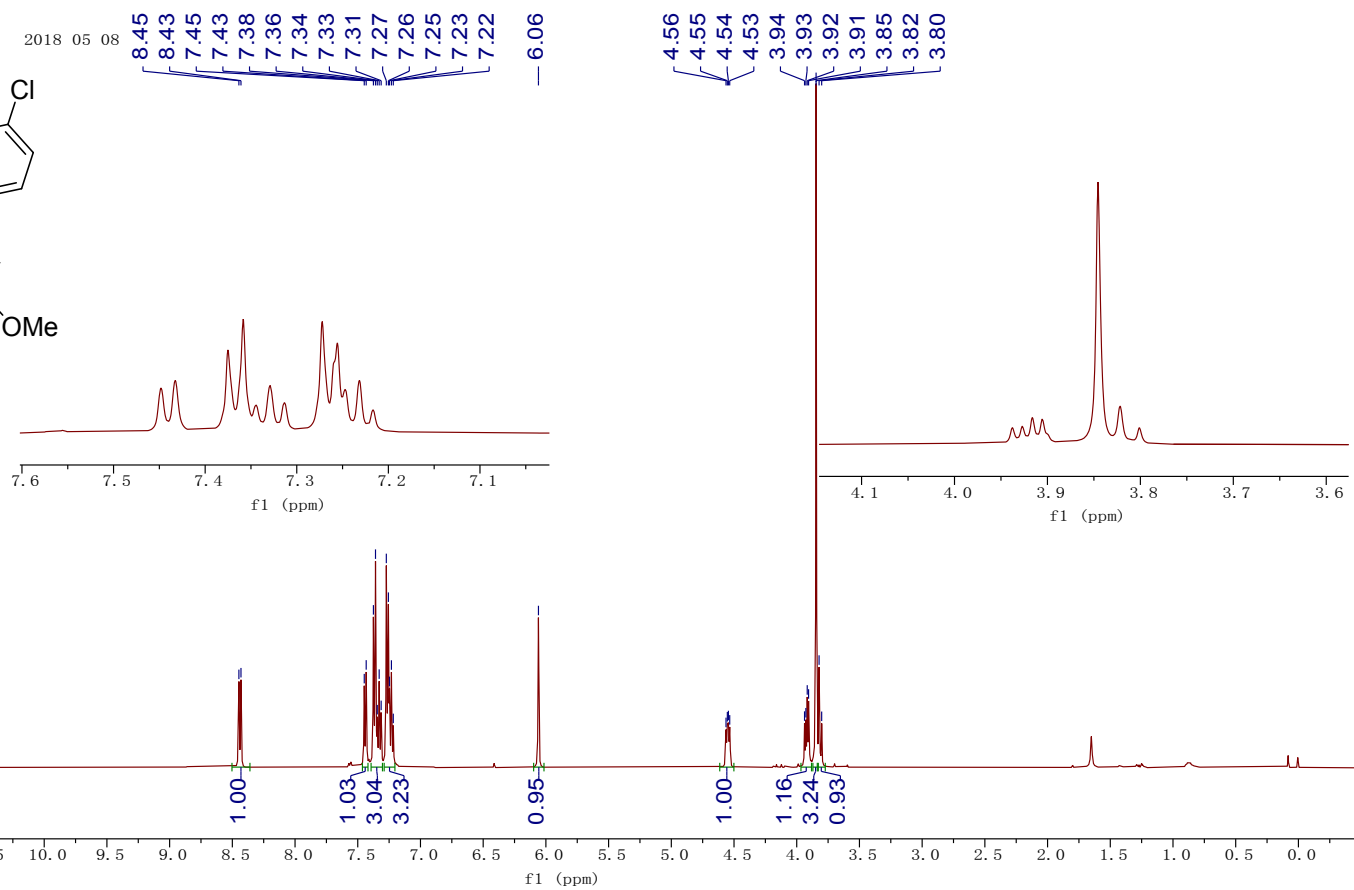

ZMH-A-3AE/2  
ZMH-A-3AE  
— 152.4

13C  
136.9  
136.6  
135.5  
133.9  
129.6  
129.4  
129.1  
124.4  
123.3  
120.3  
115.5  
— 105.3

77.2  
77.0  
76.7

— 62.8

— 54.5

— 40.3

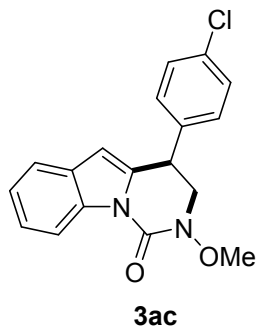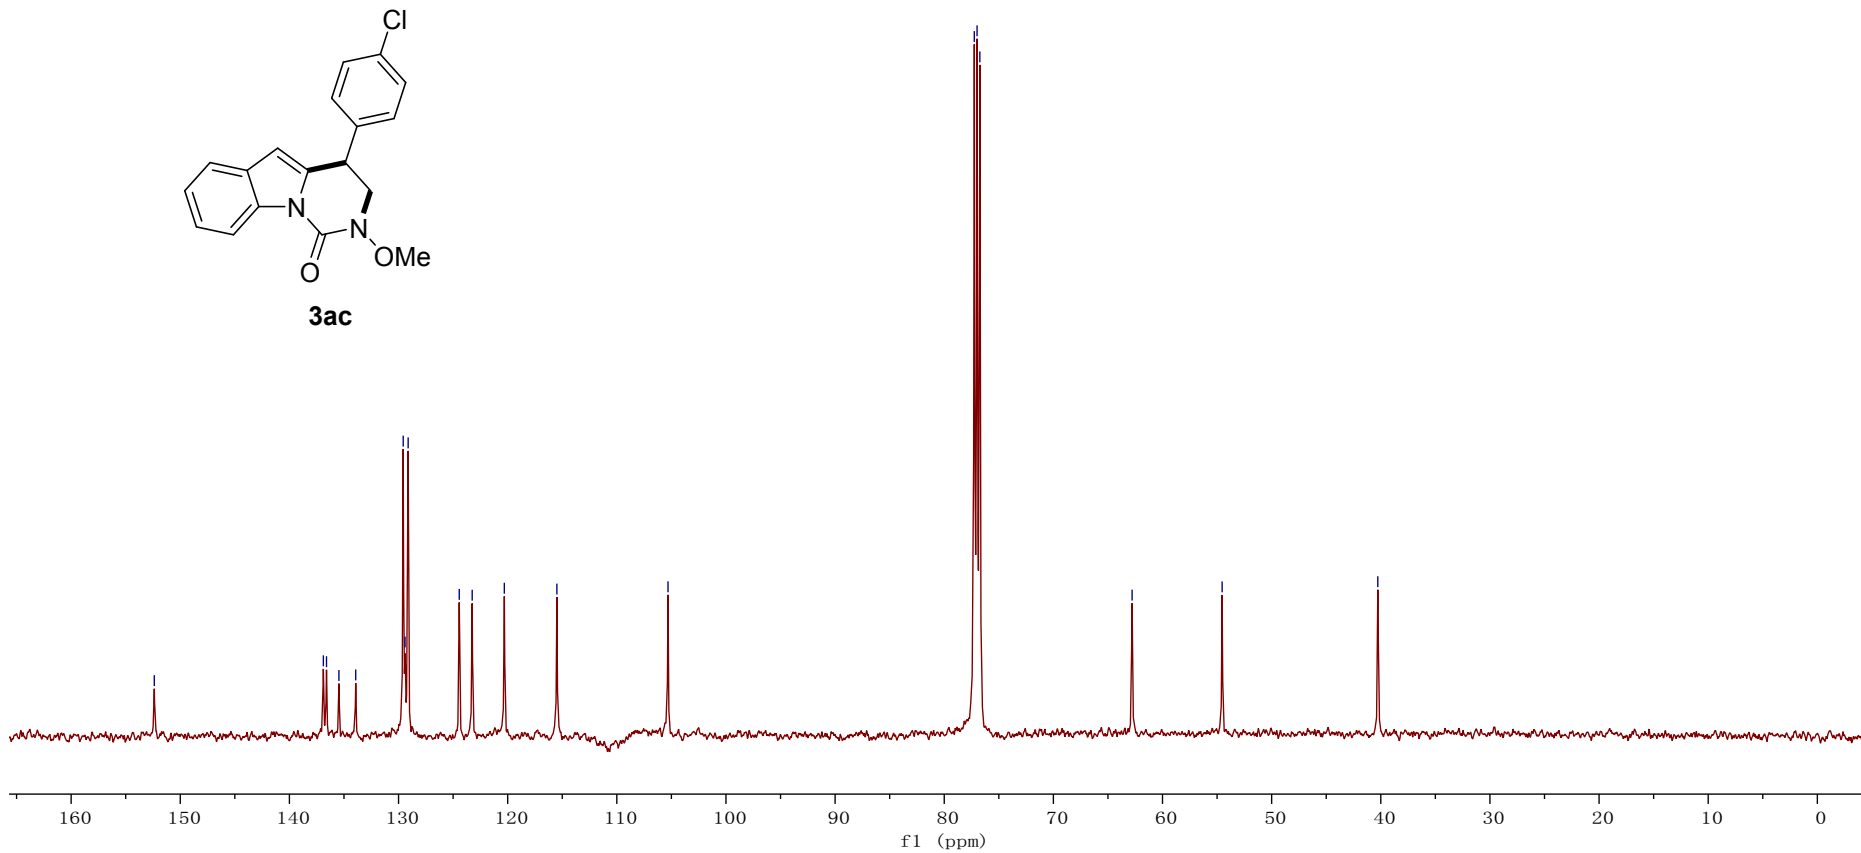



ZMH-A-3AF/1  
ZMH-A-3AF

1H 1D 2018 04 23  
8.44 8.43 7.52 7.51 7.44 7.43 7.34 7.33 7.31 7.26 7.24 7.23 7.21 7.20 6.06 4.55 4.54 4.53 4.52 3.94 3.93 3.92 3.91 3.84 3.82 3.80

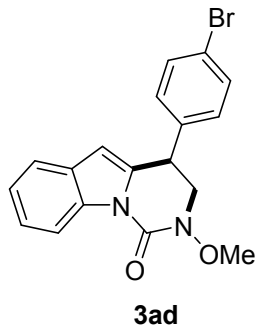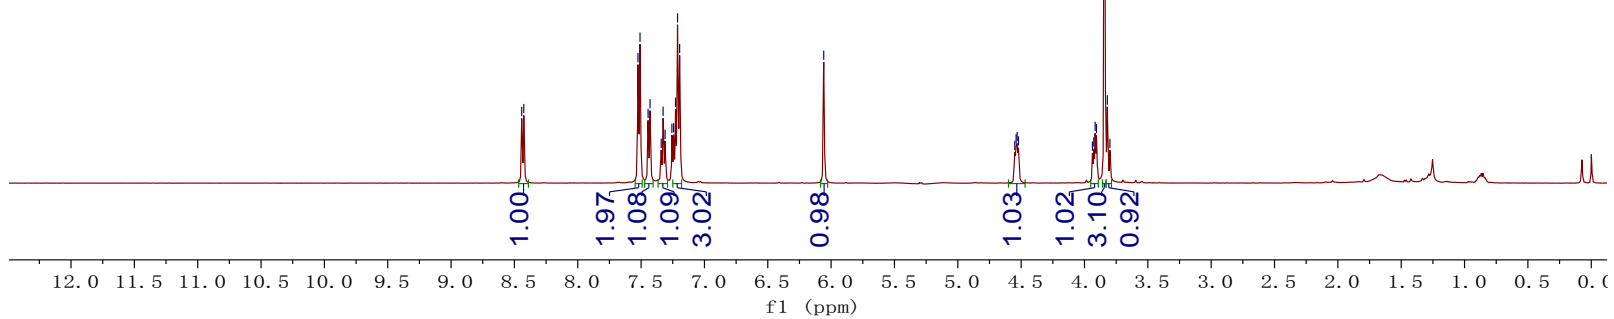

ZMH-A-3AF/2  
ZMH-A-3AF

— 152.4

<sup>13</sup>C  
137.4  
136.5  
135.5  
132.1  
129.9  
129.4  
124.4  
123.3  
122.0  
120.3  
115.5

— 105.3

{ 77.2  
77.0  
76.7

— 62.8

— 54.5

— 40.3

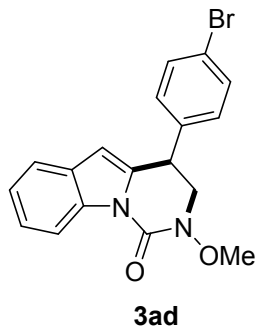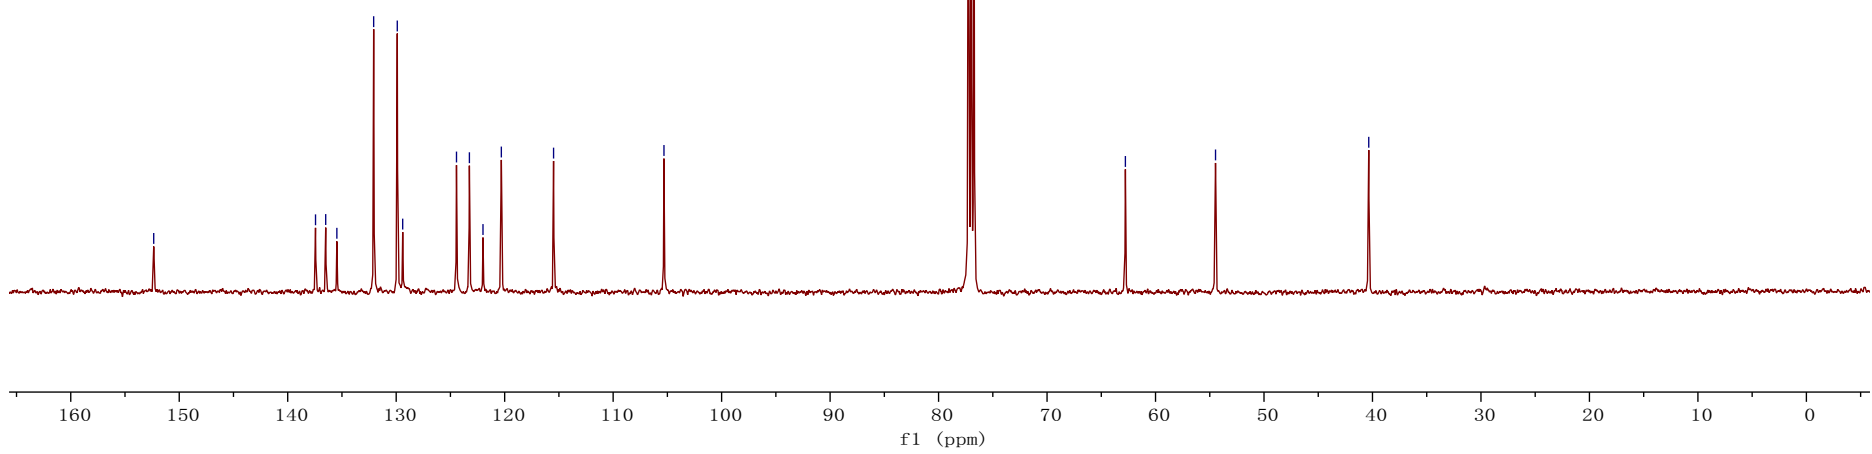

ZMH-A-3AR/1  
ZMH-A-3AR

1H 1D 2018 04 25

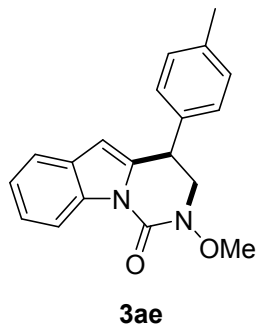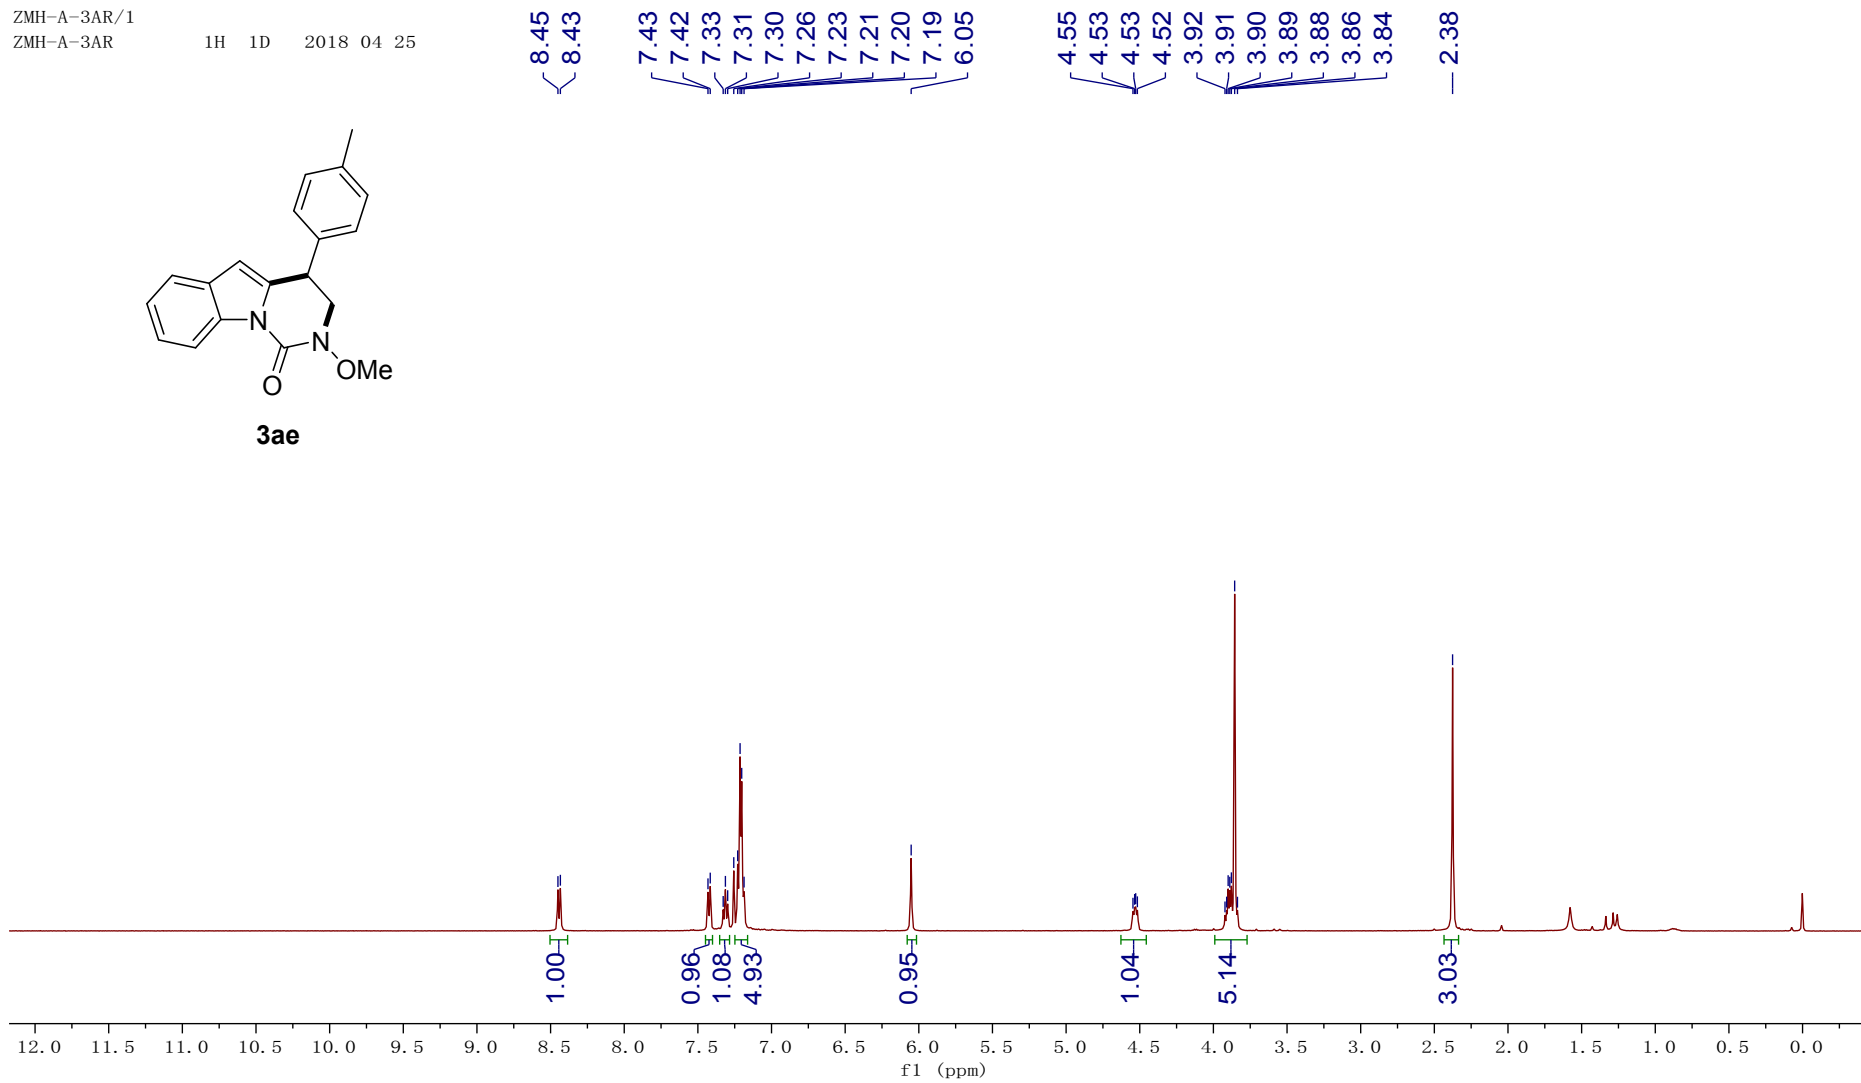

ZMH-A-3AB/2  
ZMH-A-3AB  
— 152.5

<sup>13</sup>C  
137.8  
137.6  
135.5  
135.2  
129.6  
128.1  
124.2  
123.1  
120.2  
115.5

— 105.1

77.2  
77.0  
76.7

— 62.7

— 54.7

— 40.5

— 21.1

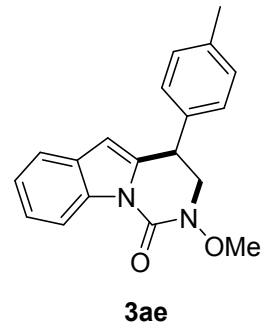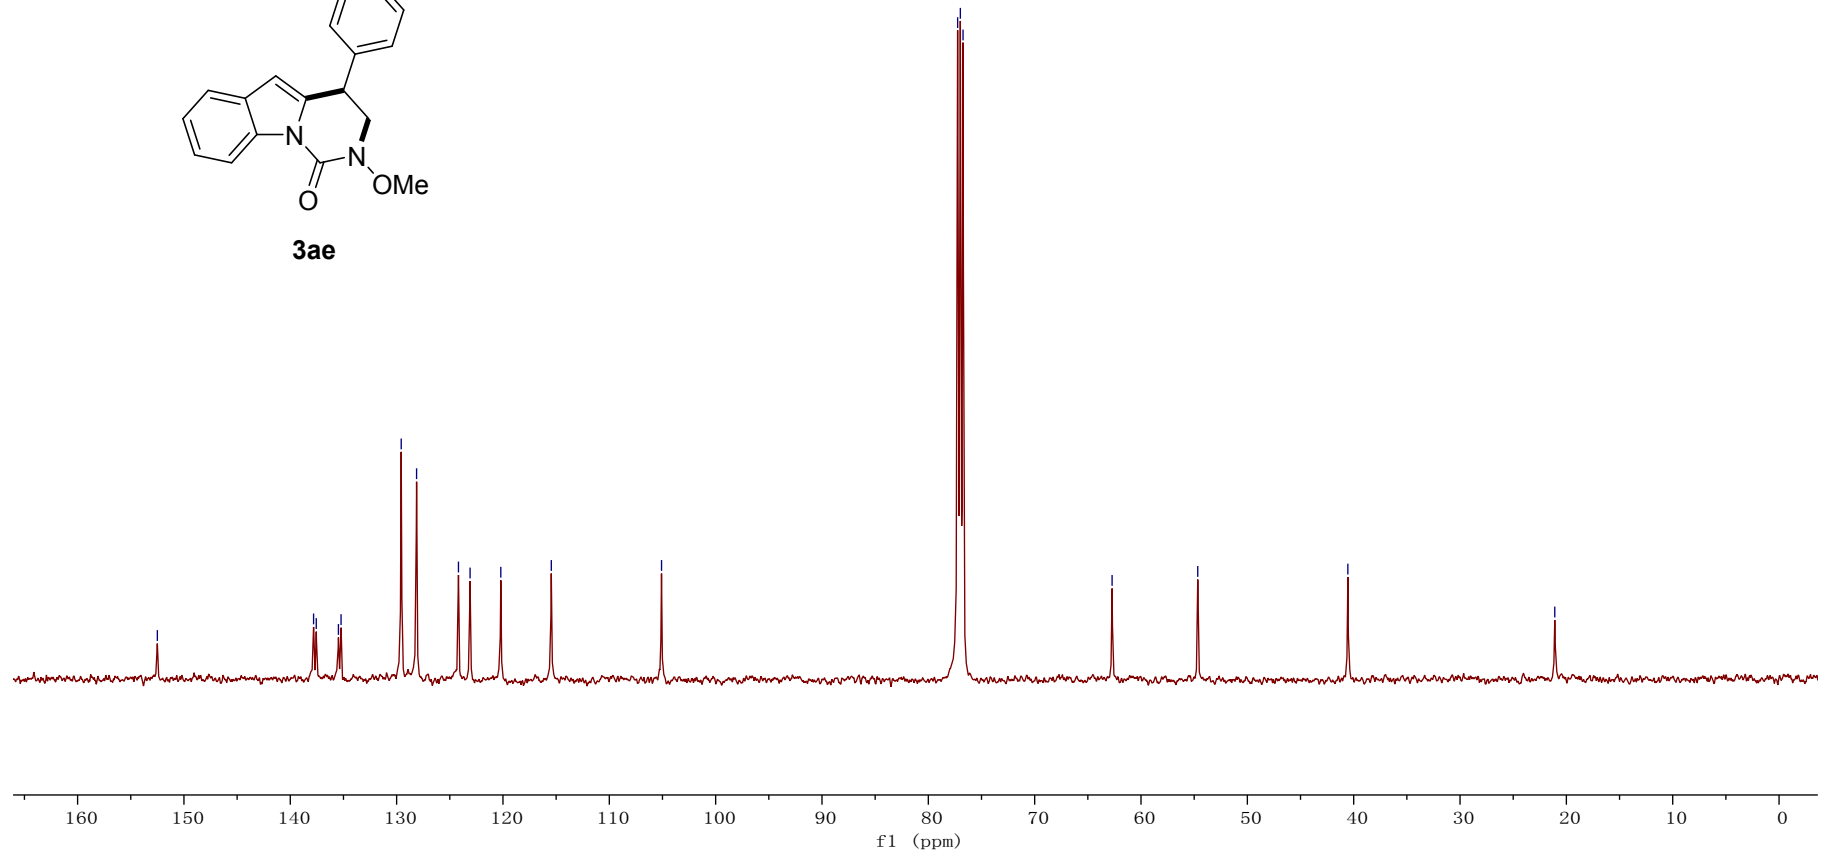

ZMH-A-3AC/1  
ZMH-A-3AC

1H 1D 2018 04 23

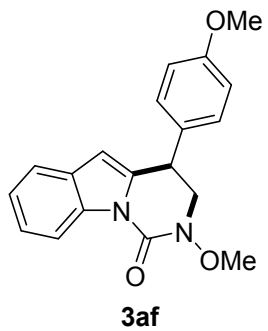

8.45  
8.43  
7.44  
7.42  
7.33  
7.31  
7.30  
7.26  
7.24  
7.23  
7.22  
7.20  
6.93  
6.91  
— 6.05

4.54  
4.52  
4.52  
4.50  
3.91  
3.90  
3.89  
3.88  
3.86  
3.83

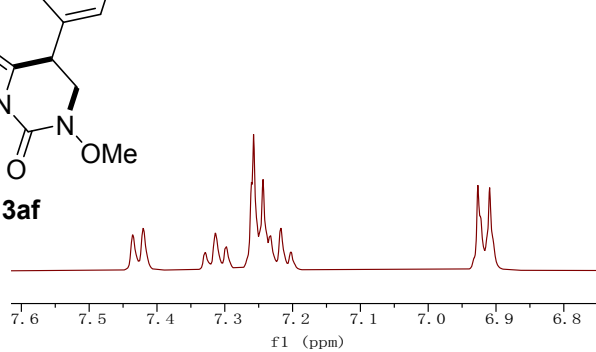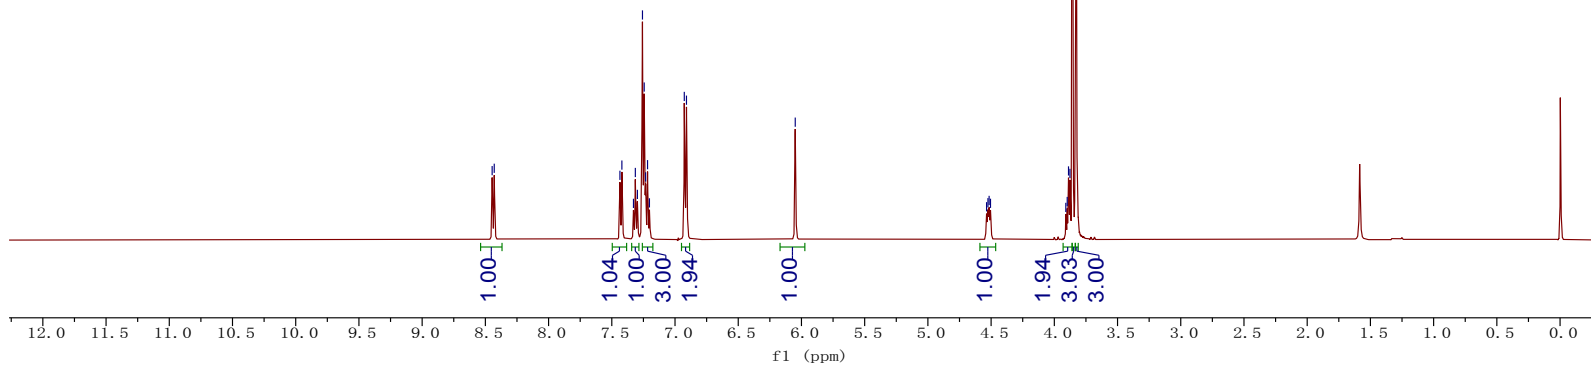

ZMH-A-AC/2  
ZMH-A-C

— 159.3  
— 152.5

13C 1H  
137.7  
136.5  
130.2  
129.5  
129.3  
124.2  
123.1  
120.2  
115.5  
114.3

— 105.0

77.0  
76.7

— 62.7

55.3  
54.8

— 40.2

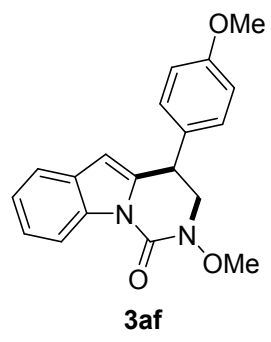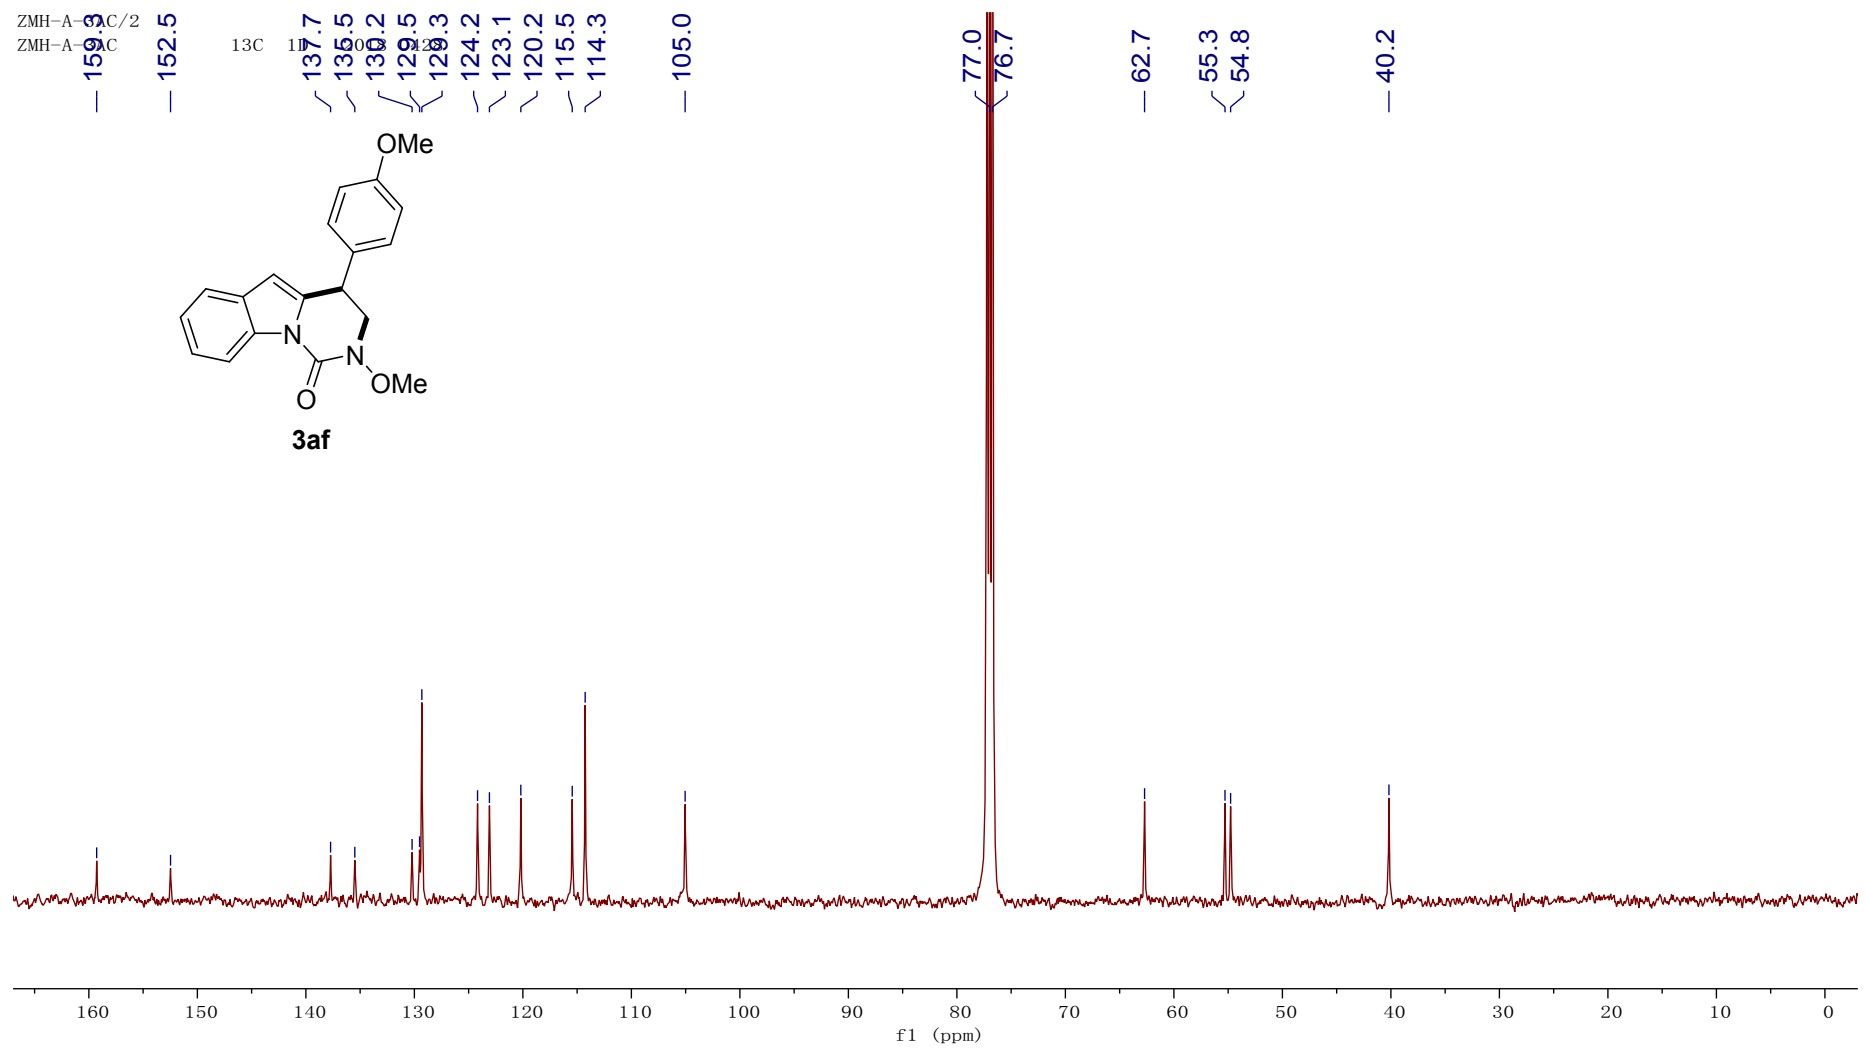

ZMH-A-3AG/1  
ZMH-A-3AG

1H 1D 2018 05 04

8.46  
7.43  
7.42  
7.40  
7.33  
7.32  
7.30  
7.28  
7.26  
7.26  
7.23  
7.22  
7.20  
6.08

4.56  
4.55  
4.54  
4.53  
3.92  
3.91  
3.90  
3.89  
3.87  
3.85

1.36  
1.36  
1.35  
1.35  
1.34  
1.34  
1.33  
1.33

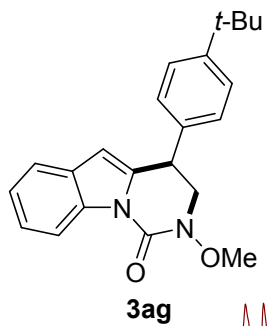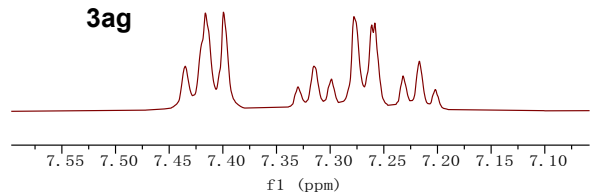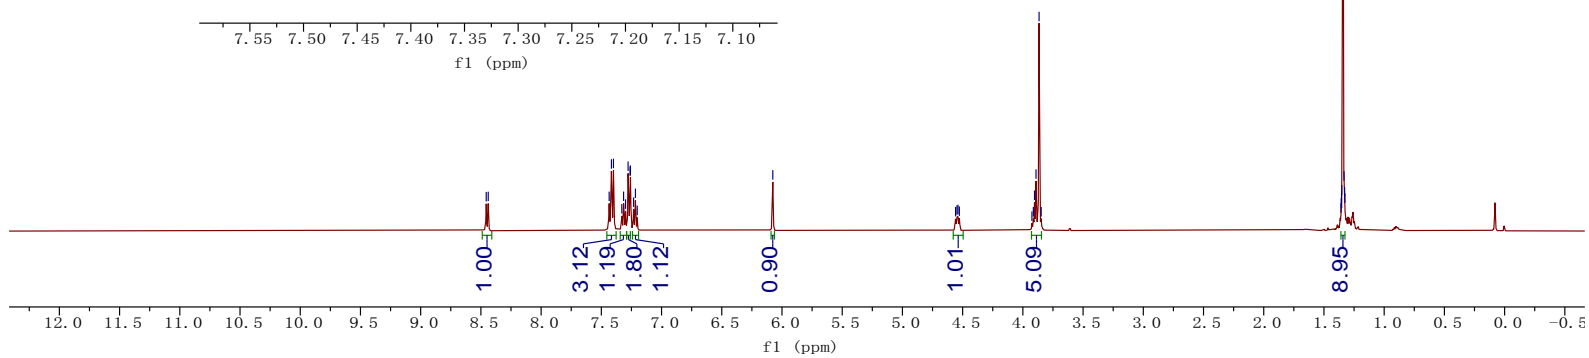

ZMH-A-3AG.  
ZMH-A-3AG

152.8  
151.9

13C

137.6  
135.5  
133.1  
129.6  
129.9  
125.8  
124.2  
123.1  
120.2  
115.5

105.1

77.2  
77.0  
76.7

62.7

54.6

40.5

34.6  
31.3

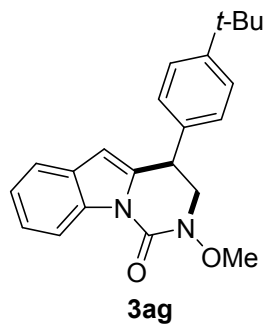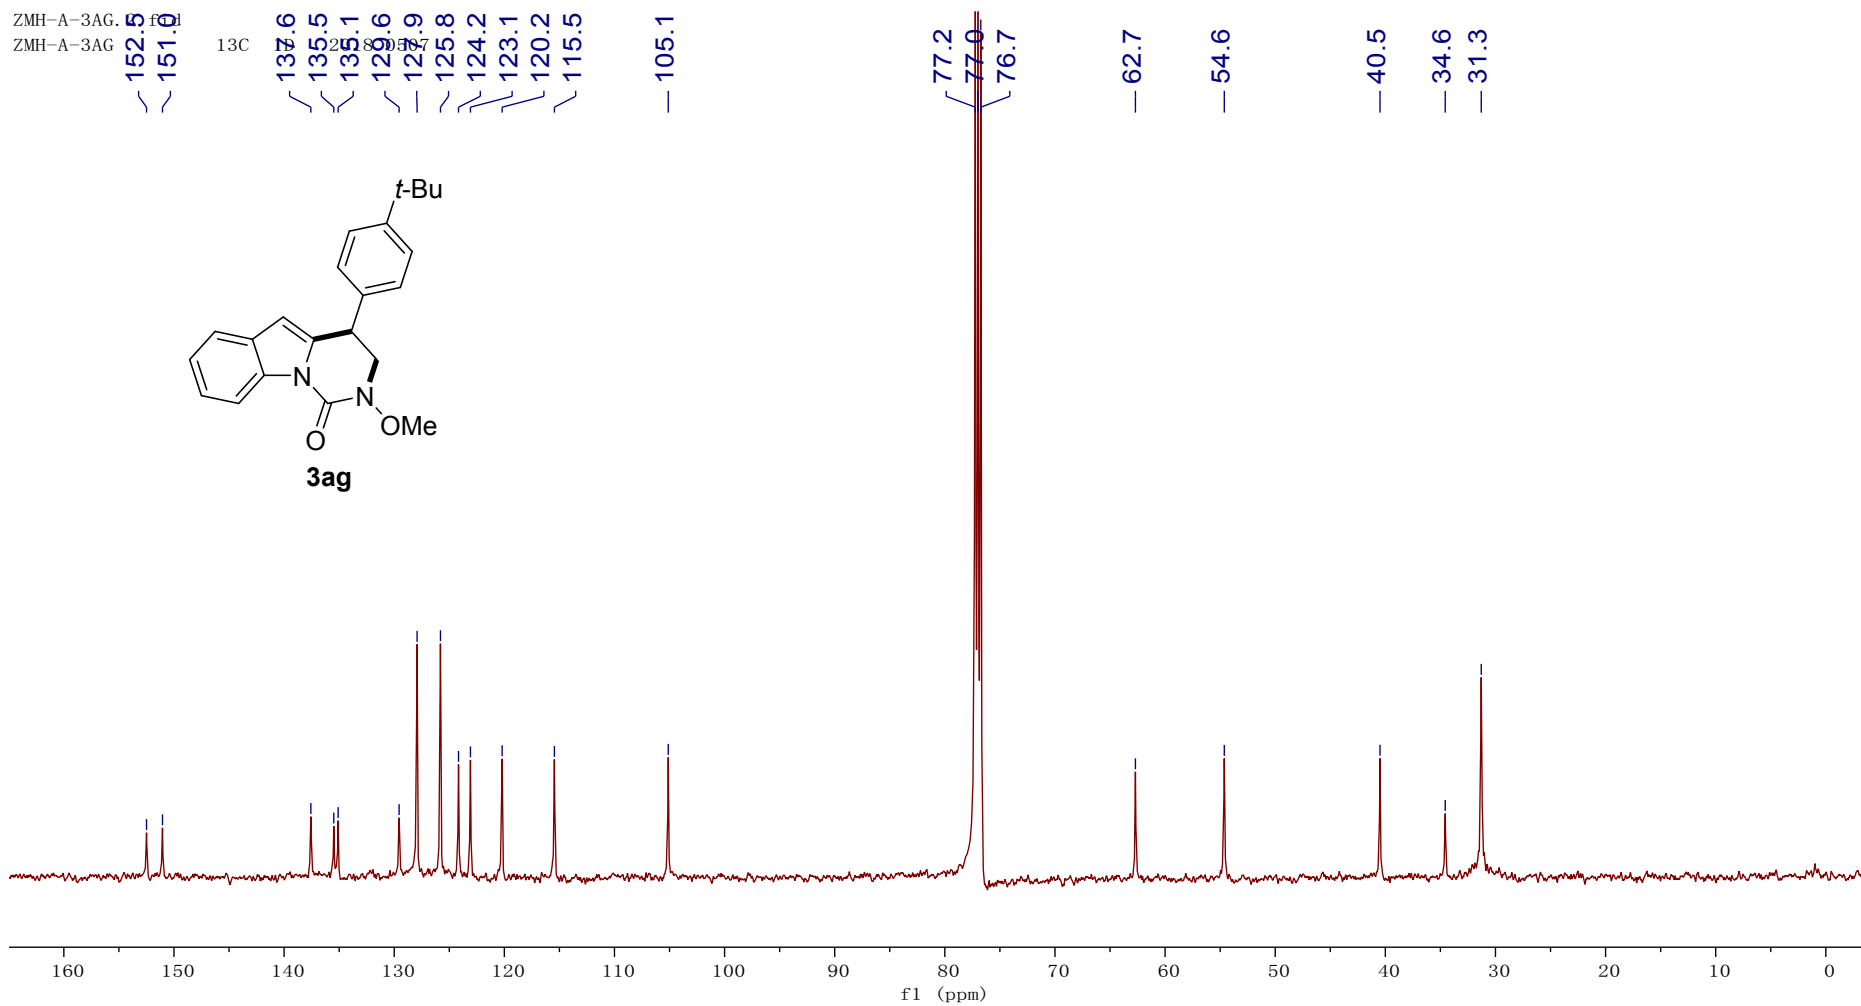



ZMH-A-3AJ/1  
ZMH-A-3AJ

1H 1D 2018 05 21

8.42  
8.41  
7.44  
7.42  
7.31  
7.30  
7.29  
7.28  
7.23  
7.21  
7.20  
7.18  
6.07  
4.55  
4.54  
4.53  
4.52  
3.94  
3.92  
3.91  
3.90  
3.85  
3.83  
3.81

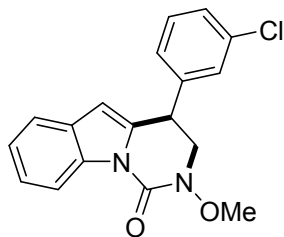

**3ah**

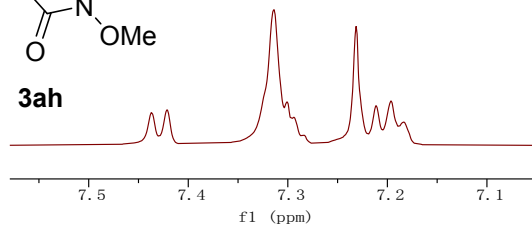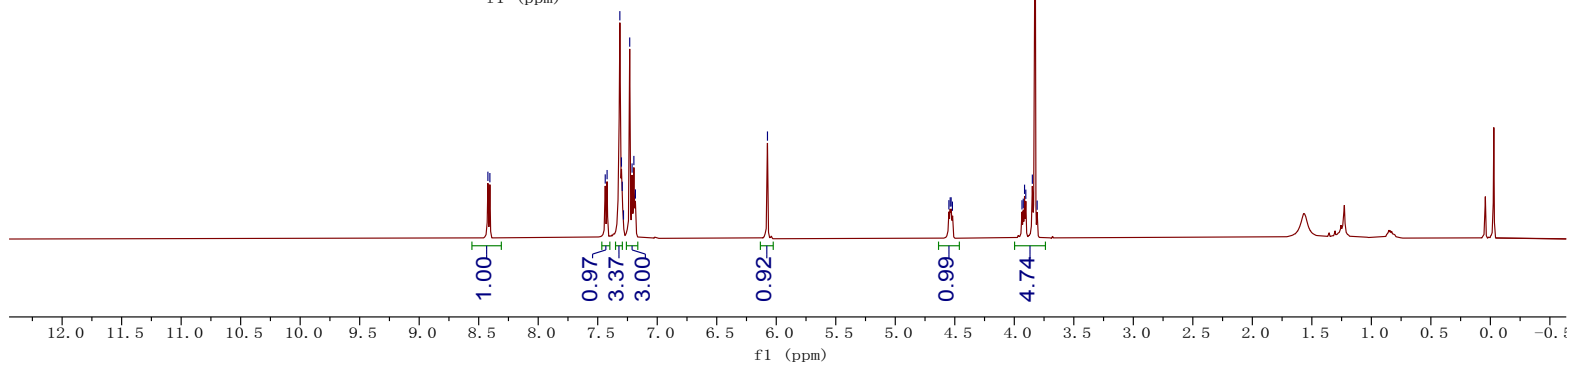

ZMH-A-3A.12  
ZMH-A-3A.1

152.4  
140.4  
136.2  
135.5  
134.8  
130.2  
129.4  
128.4  
128.3  
126.4  
124.5  
123.3  
120.3  
115.5  
105.4

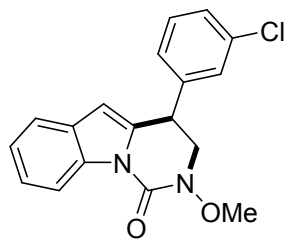

3ah

77.2  
77.0  
76.7

62.8

54.5

40.5

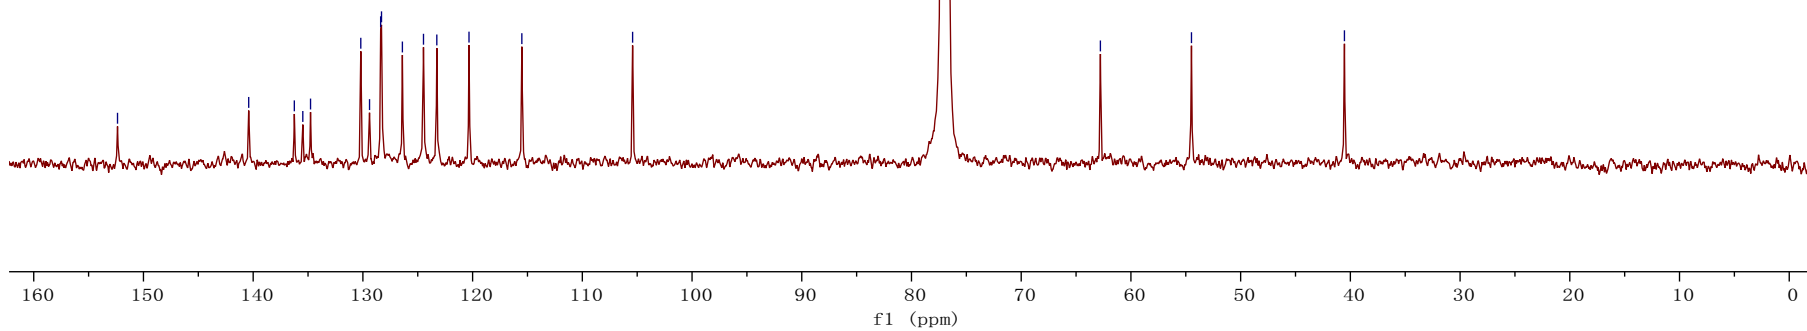

ZMH-A-3AI/1  
ZMH-A-3AI

1H 1D 2018 05 04

8.47  
8.45  
7.43  
7.41  
7.34  
7.32  
7.31  
7.29  
7.28  
7.26  
7.24  
7.22  
7.20  
7.19  
7.17  
— 6.00

4.83  
4.82  
4.80

3.89  
3.87  
3.87

— 2.48

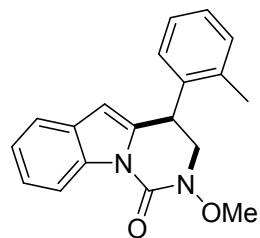

**3ai**

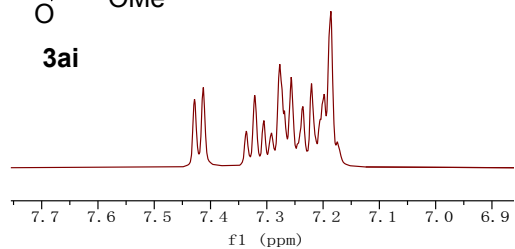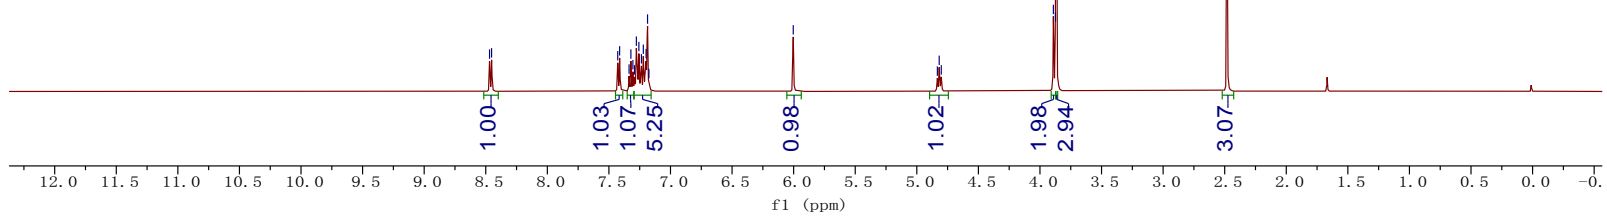

ZMH-A-3A1  
ZMH-A-3A1

13C

152.2  
137.3  
136.3  
135.9  
135.5  
130.9  
129.6  
127.9  
126.6  
124.2  
123.1  
120.2  
115.5  
104.8

77.3  
77.0  
76.8

62.7

53.4

36.9

19.6

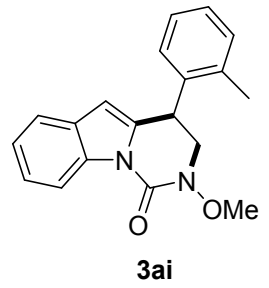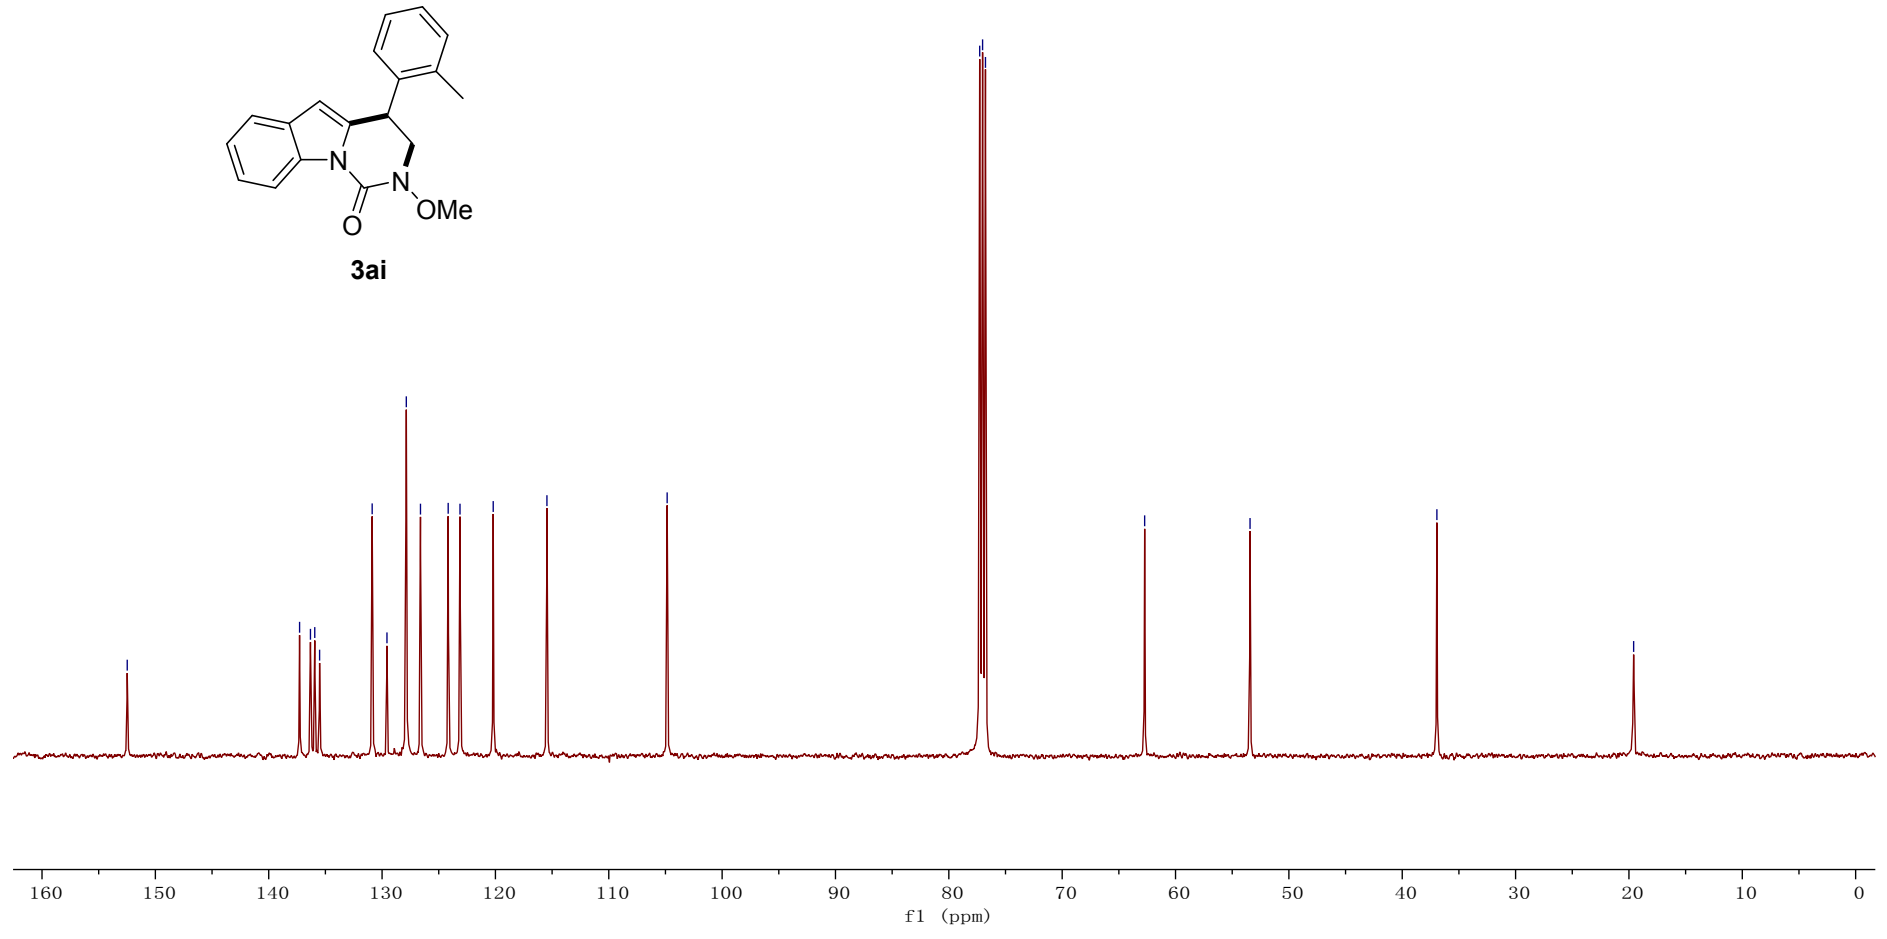

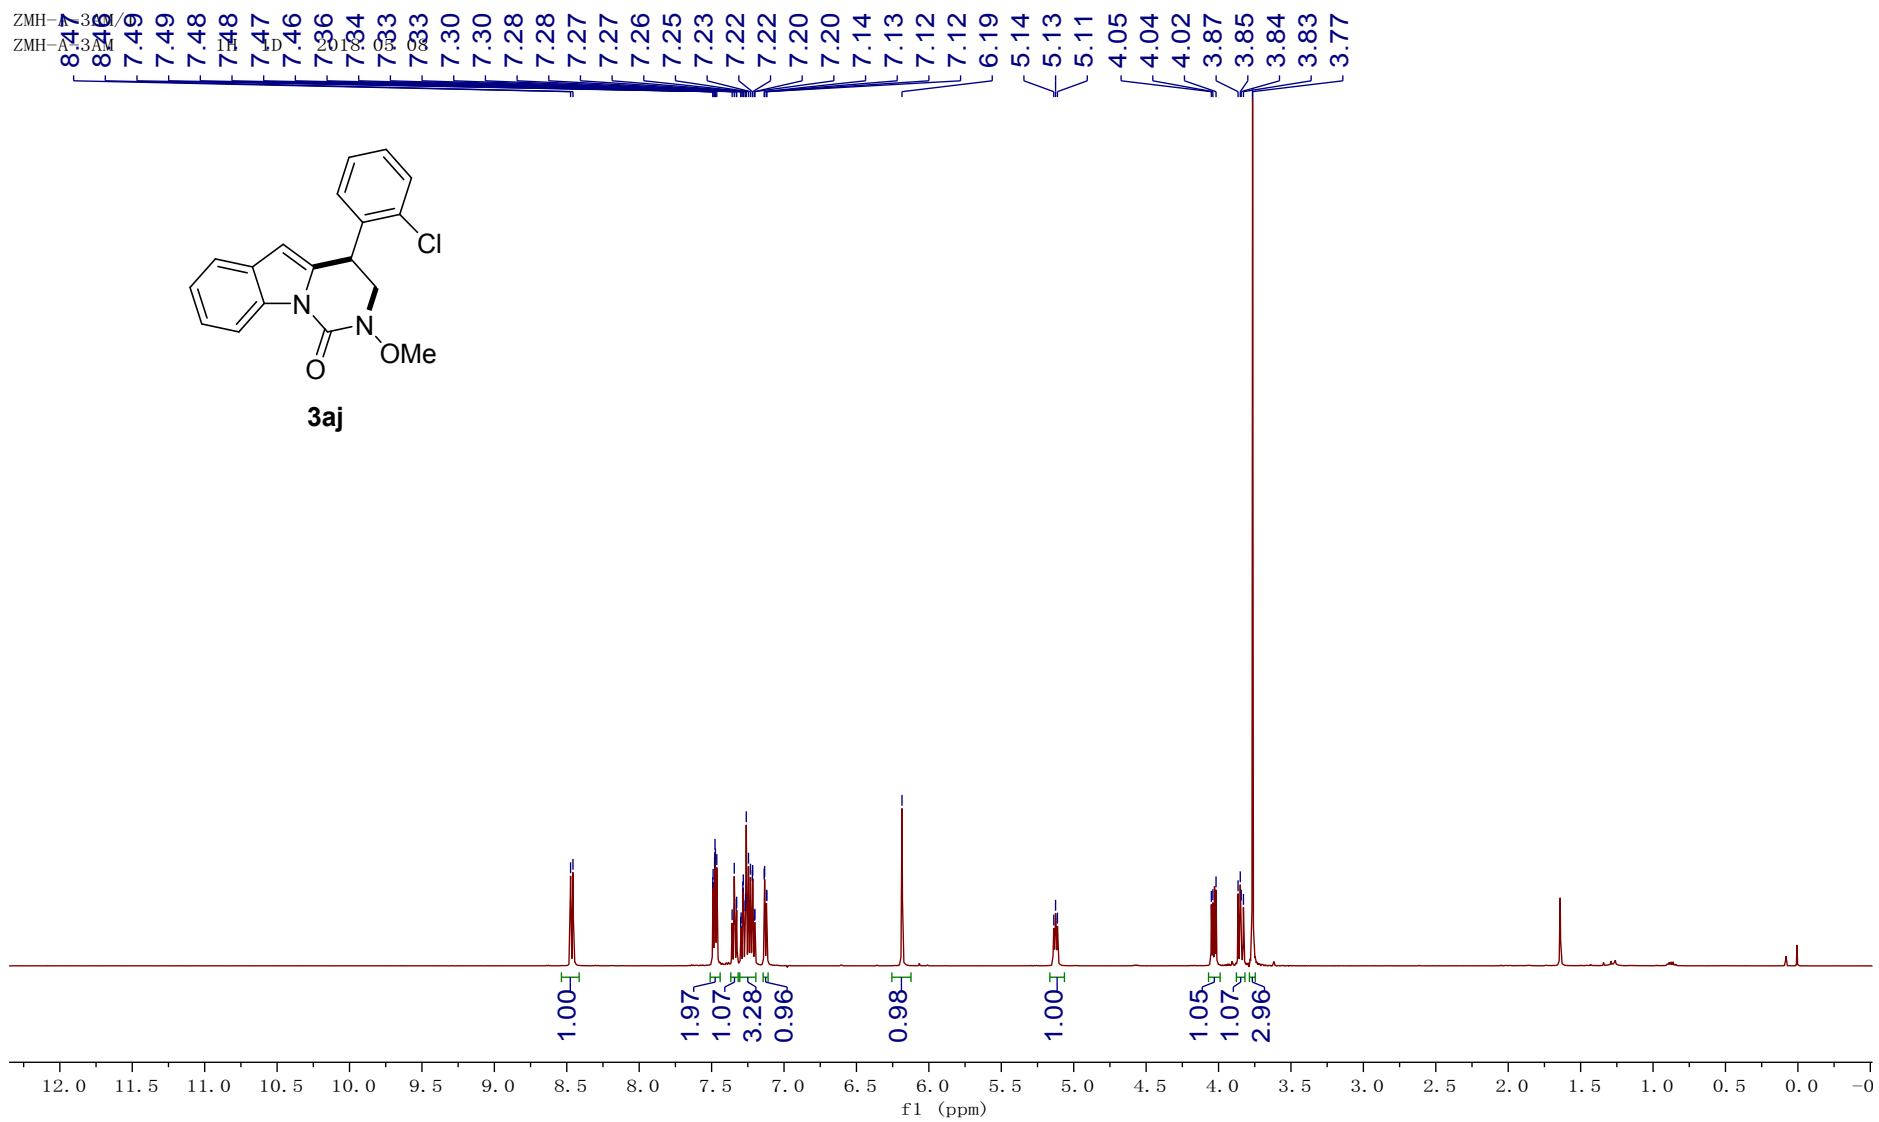

ZMH-A-3AM  
ZMH-A-3AM

— 152.2 —  
136.5  
135.5  
135.5  
134.4  
129.9  
129.5  
129.2  
127.3  
124.4  
123.2  
120.3  
115.5  
— 105.2 —

{ 77.2  
77.0  
76.7

— 62.6

— 52.9

— 37.1

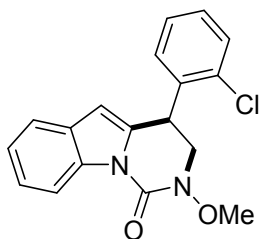

**3aj**

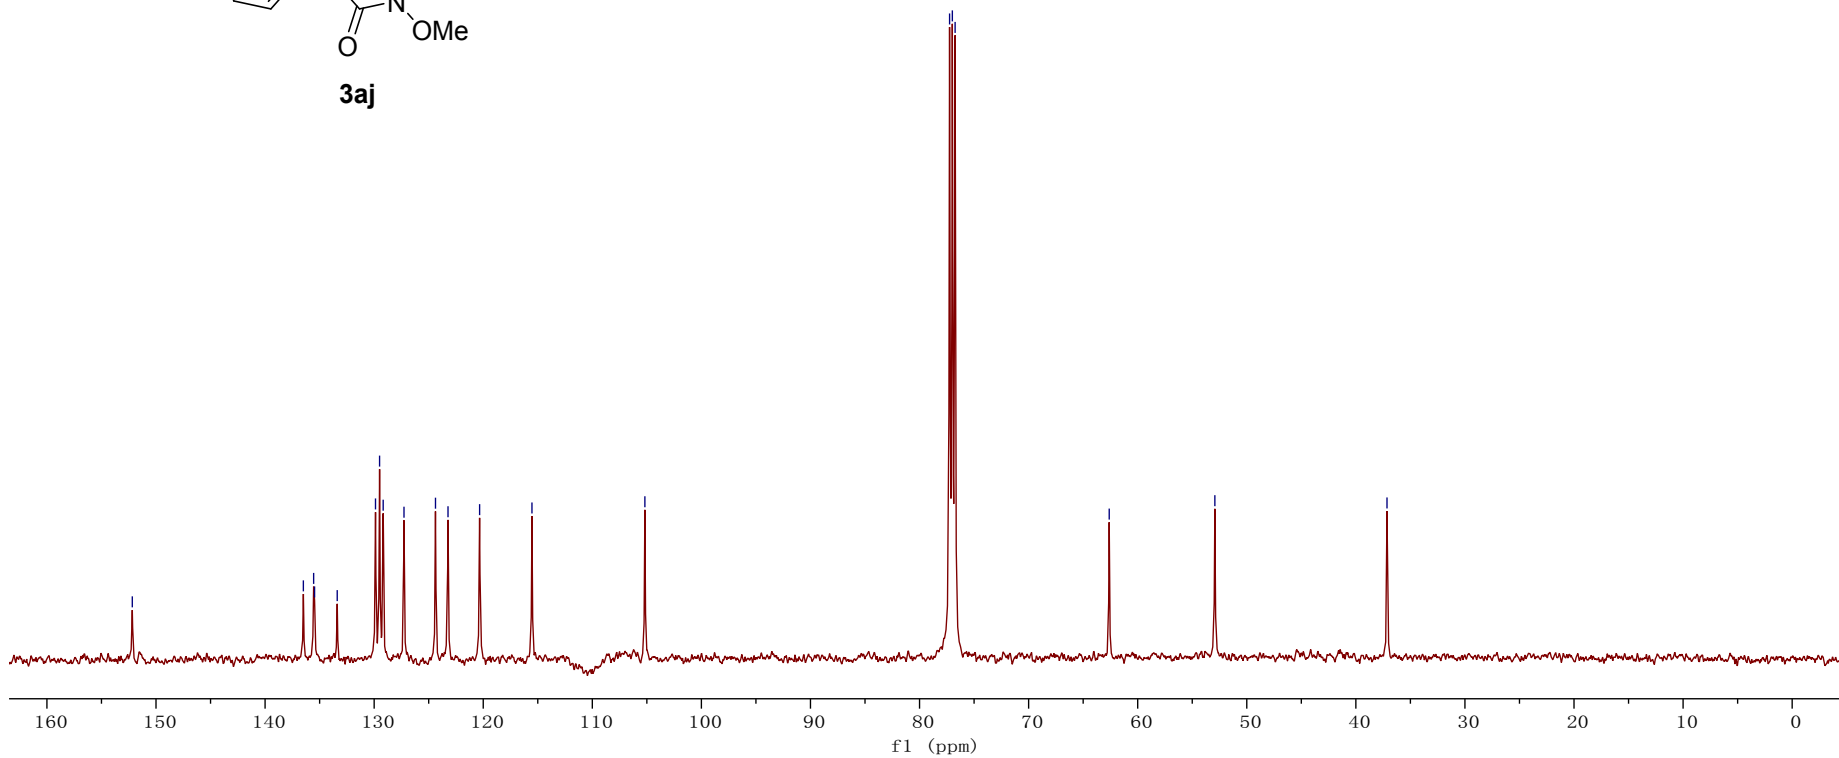

ZMH-A-3AO/1  
ZMH-A-3AO

1H 1D  
8.48  
8.37  
7.88  
7.87  
7.86  
7.81  
7.79  
7.52  
7.52  
7.51  
7.51  
7.43  
7.42  
7.35  
7.34  
7.32  
7.25  
7.24  
7.23  
7.21  
6.07  
4.75  
4.74  
4.72  
4.00  
3.98  
3.85  
3.84

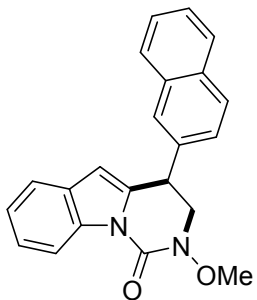

3ak

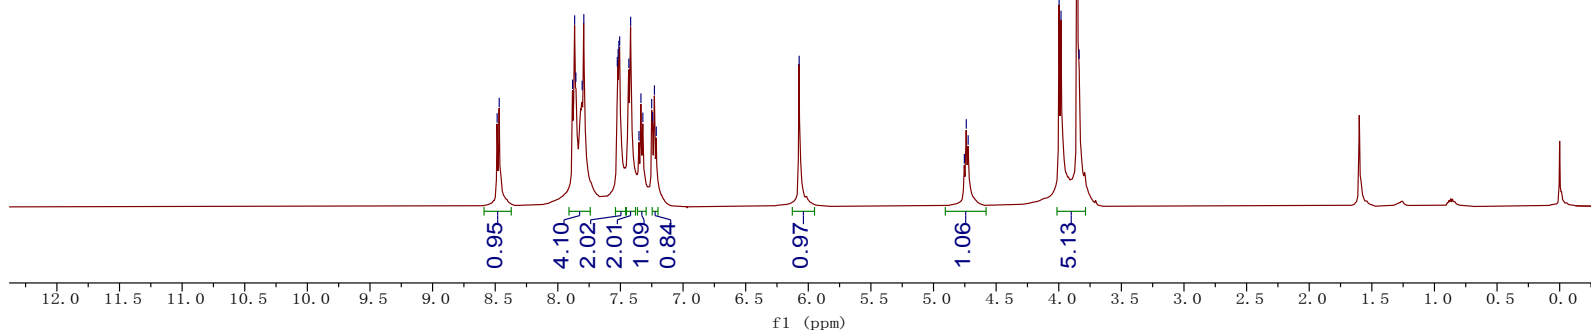

ZMH-A-3A  
 ZMH-A-3A  
 152.6  
 137.2  
 135.6  
 135.5  
 133.3  
 132.9  
 129.5  
 128.8  
 127.8  
 127.7  
 127.5  
 126.5  
 126.4  
 125.7  
 124.3  
 123.2  
 120.3  
 115.5  
 — 105.4

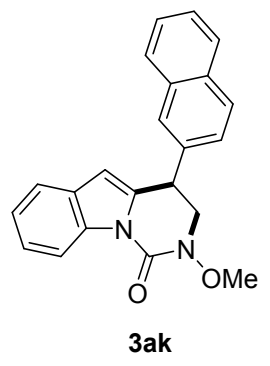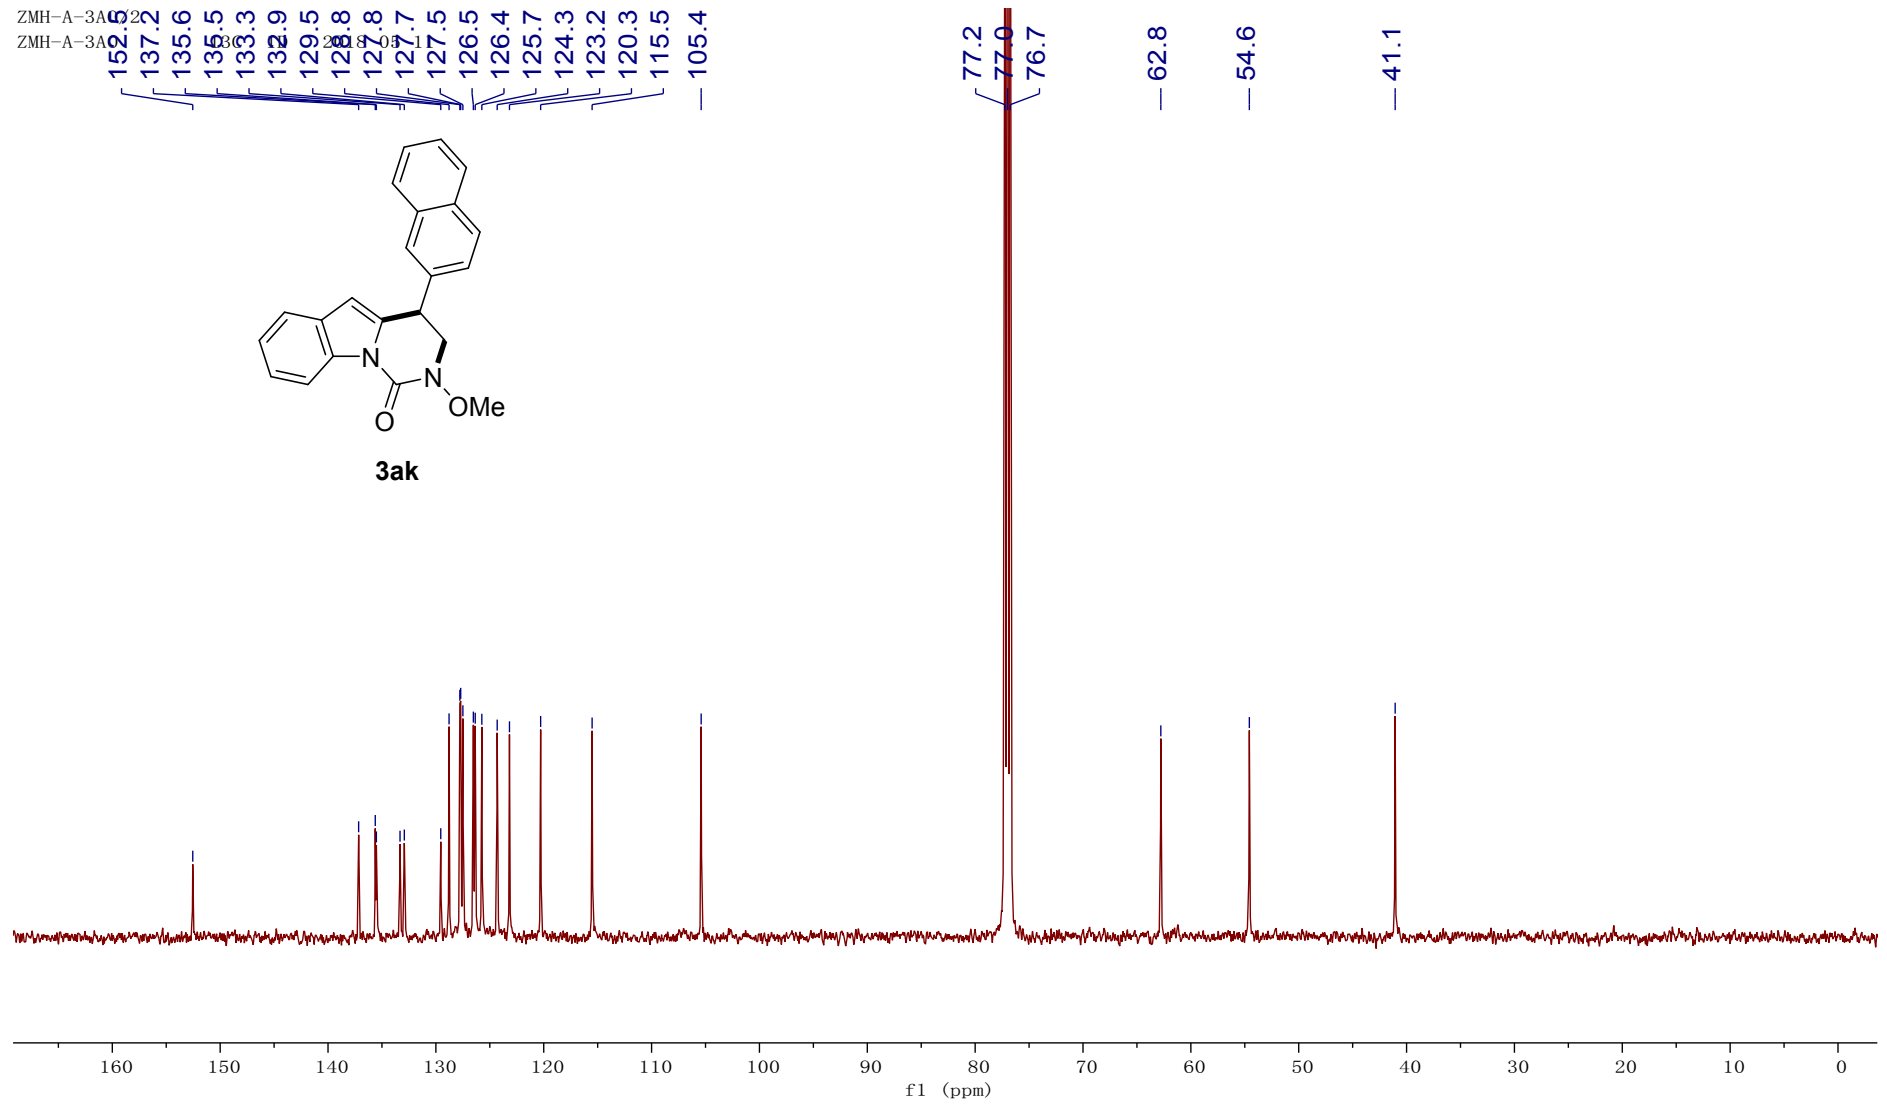



ZMH-A-3AN.1.fid

ZMH-A-3AN

1H 1D 2018 05 15

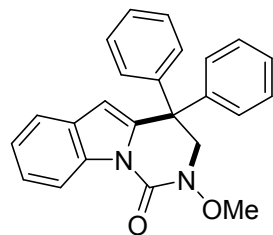

3al

8.45  
8.44  
7.47  
7.46  
7.34  
7.33  
7.26  
7.24  
7.23  
7.17  
7.16  
— 6.08  
— 4.46  
— 3.52

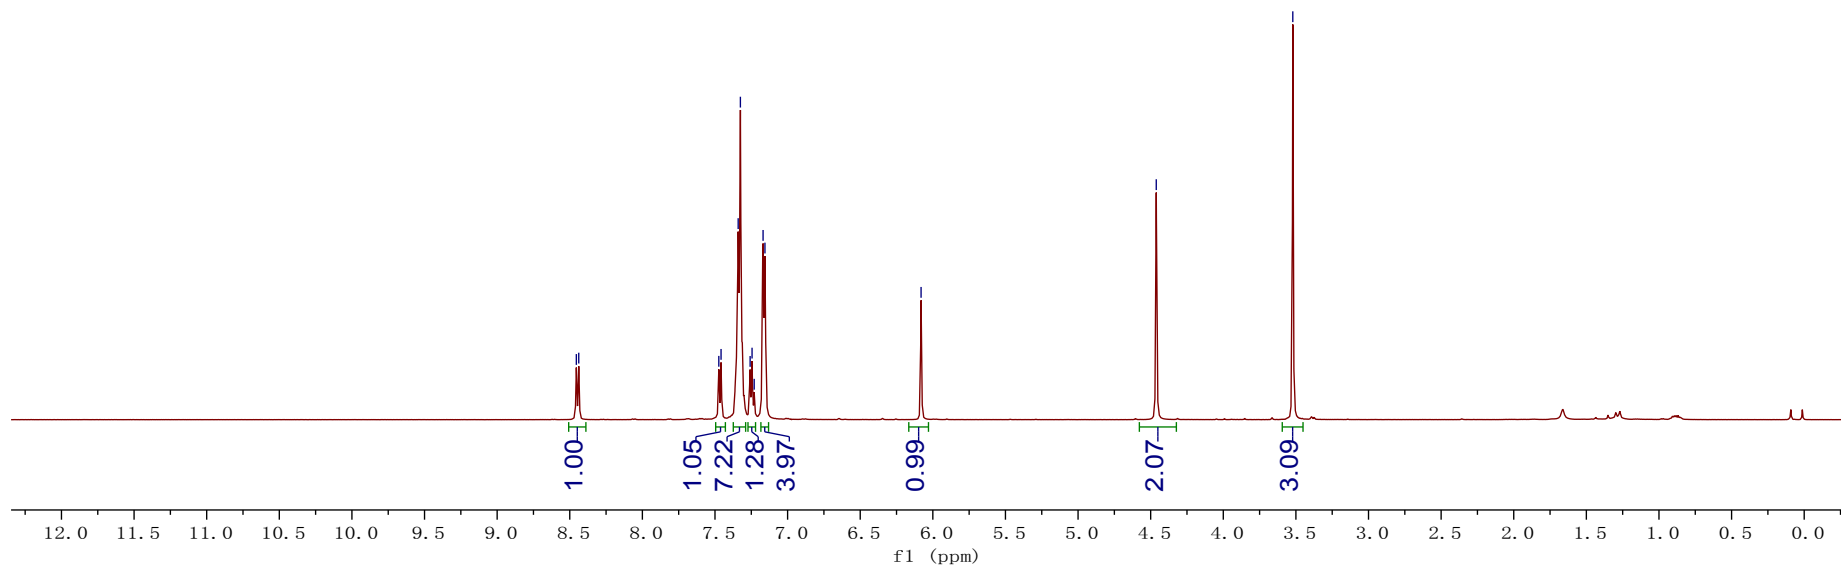

ZMH-A-3AN/2  
ZMH-A-3AN

— 151.3  
— 142.0  
— 140.1  
— 135.7  
— 128.9  
— 128.5  
— 128.1  
— 127.6  
— 124.5  
— 123.1  
— 120.5  
— 115.5  
— 107.5

{ 77.3  
{ 77.0  
{ 76.8

— 62.3  
— 58.7

— 50.9

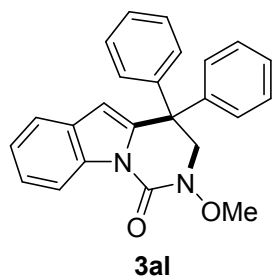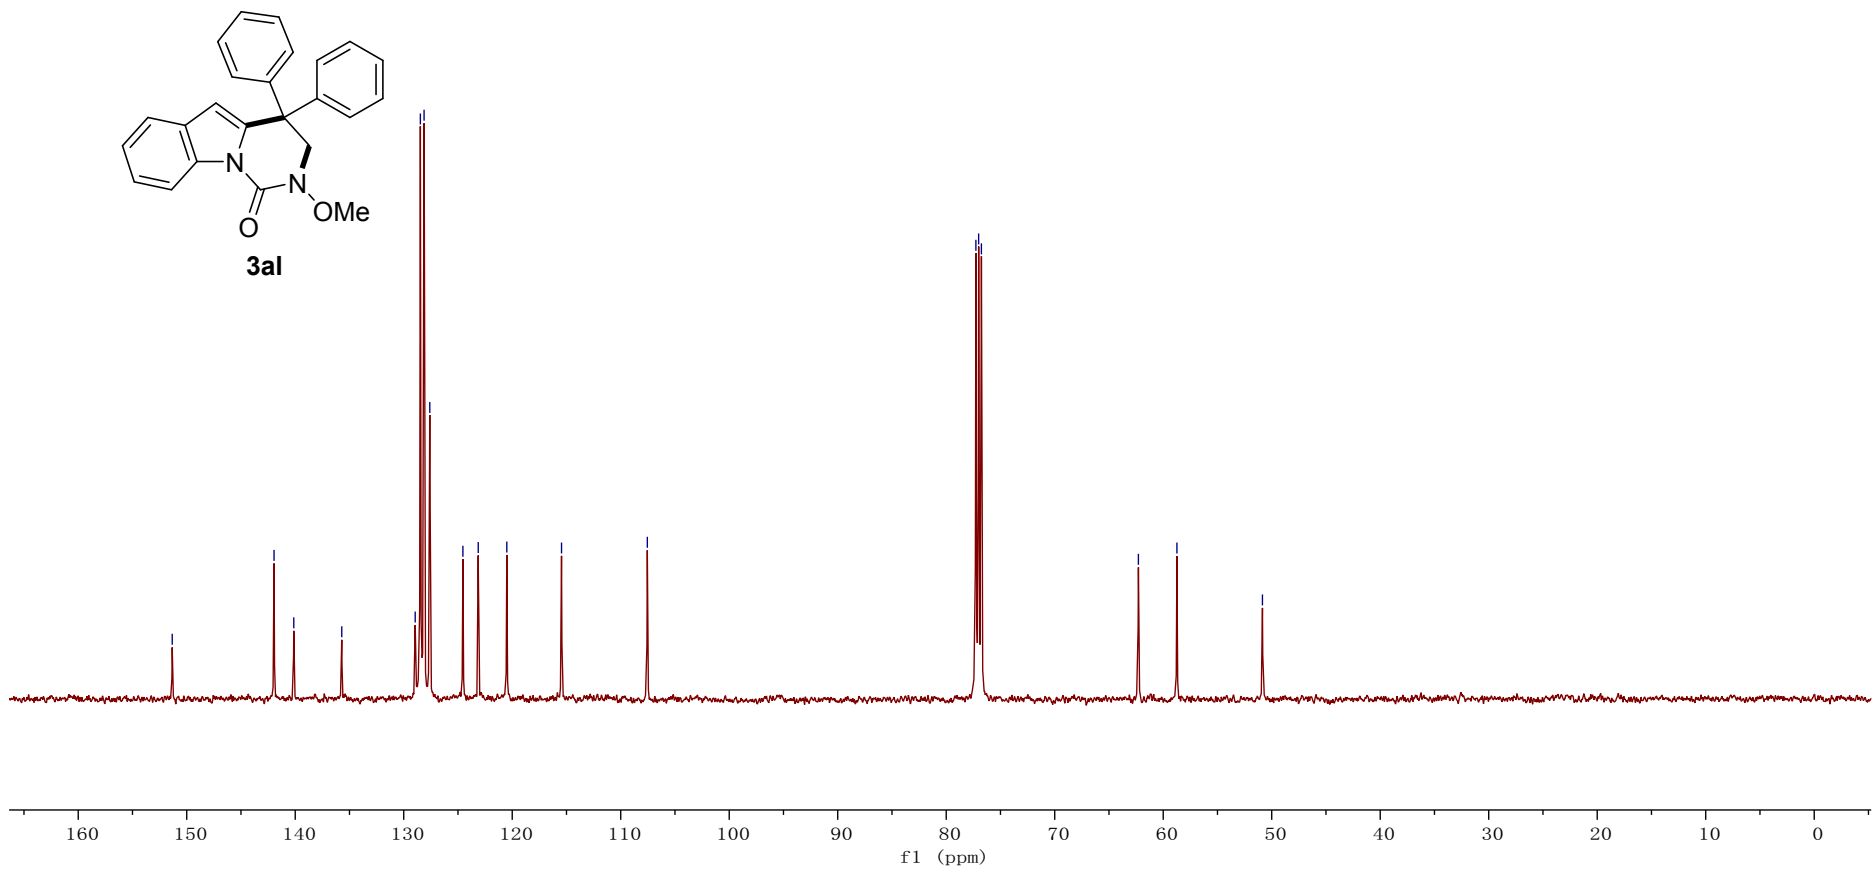

ZMH-20190321A.1.fid  
PROTON CDC13 (E:\data\liming)

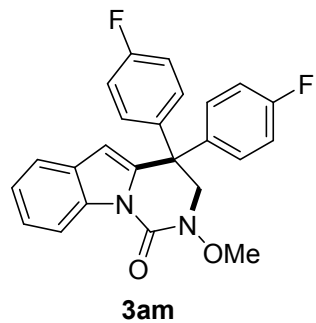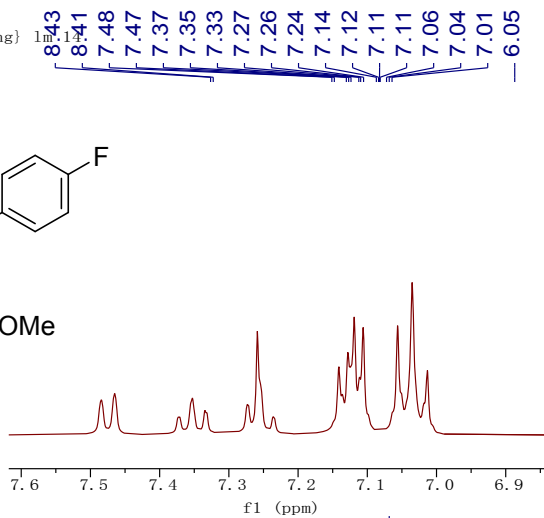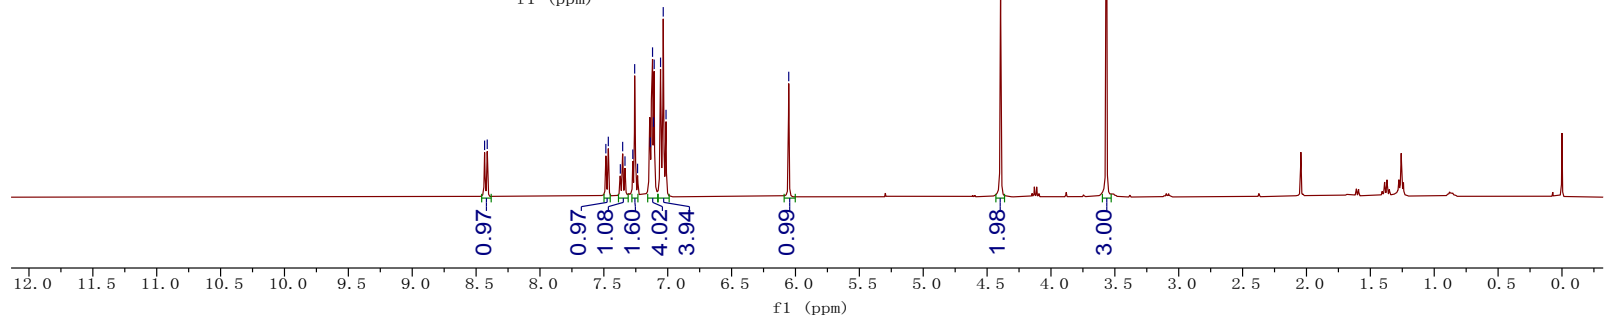

ZMH-20190321A.fid  
ZMH-20190321A

163.4  
161.4  
158.3  
139.8  
138.5  
135.8  
129.8  
129.8  
128.8  
124.9  
123.4  
120.6  
115.6  
115.4  
107.6

13C 1019

77.3  
77.0  
76.8  
62.5  
59.0  
50.0

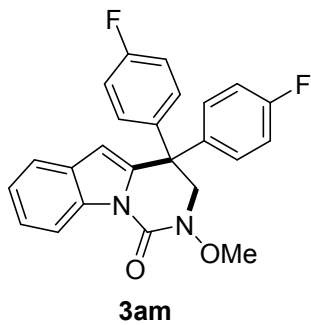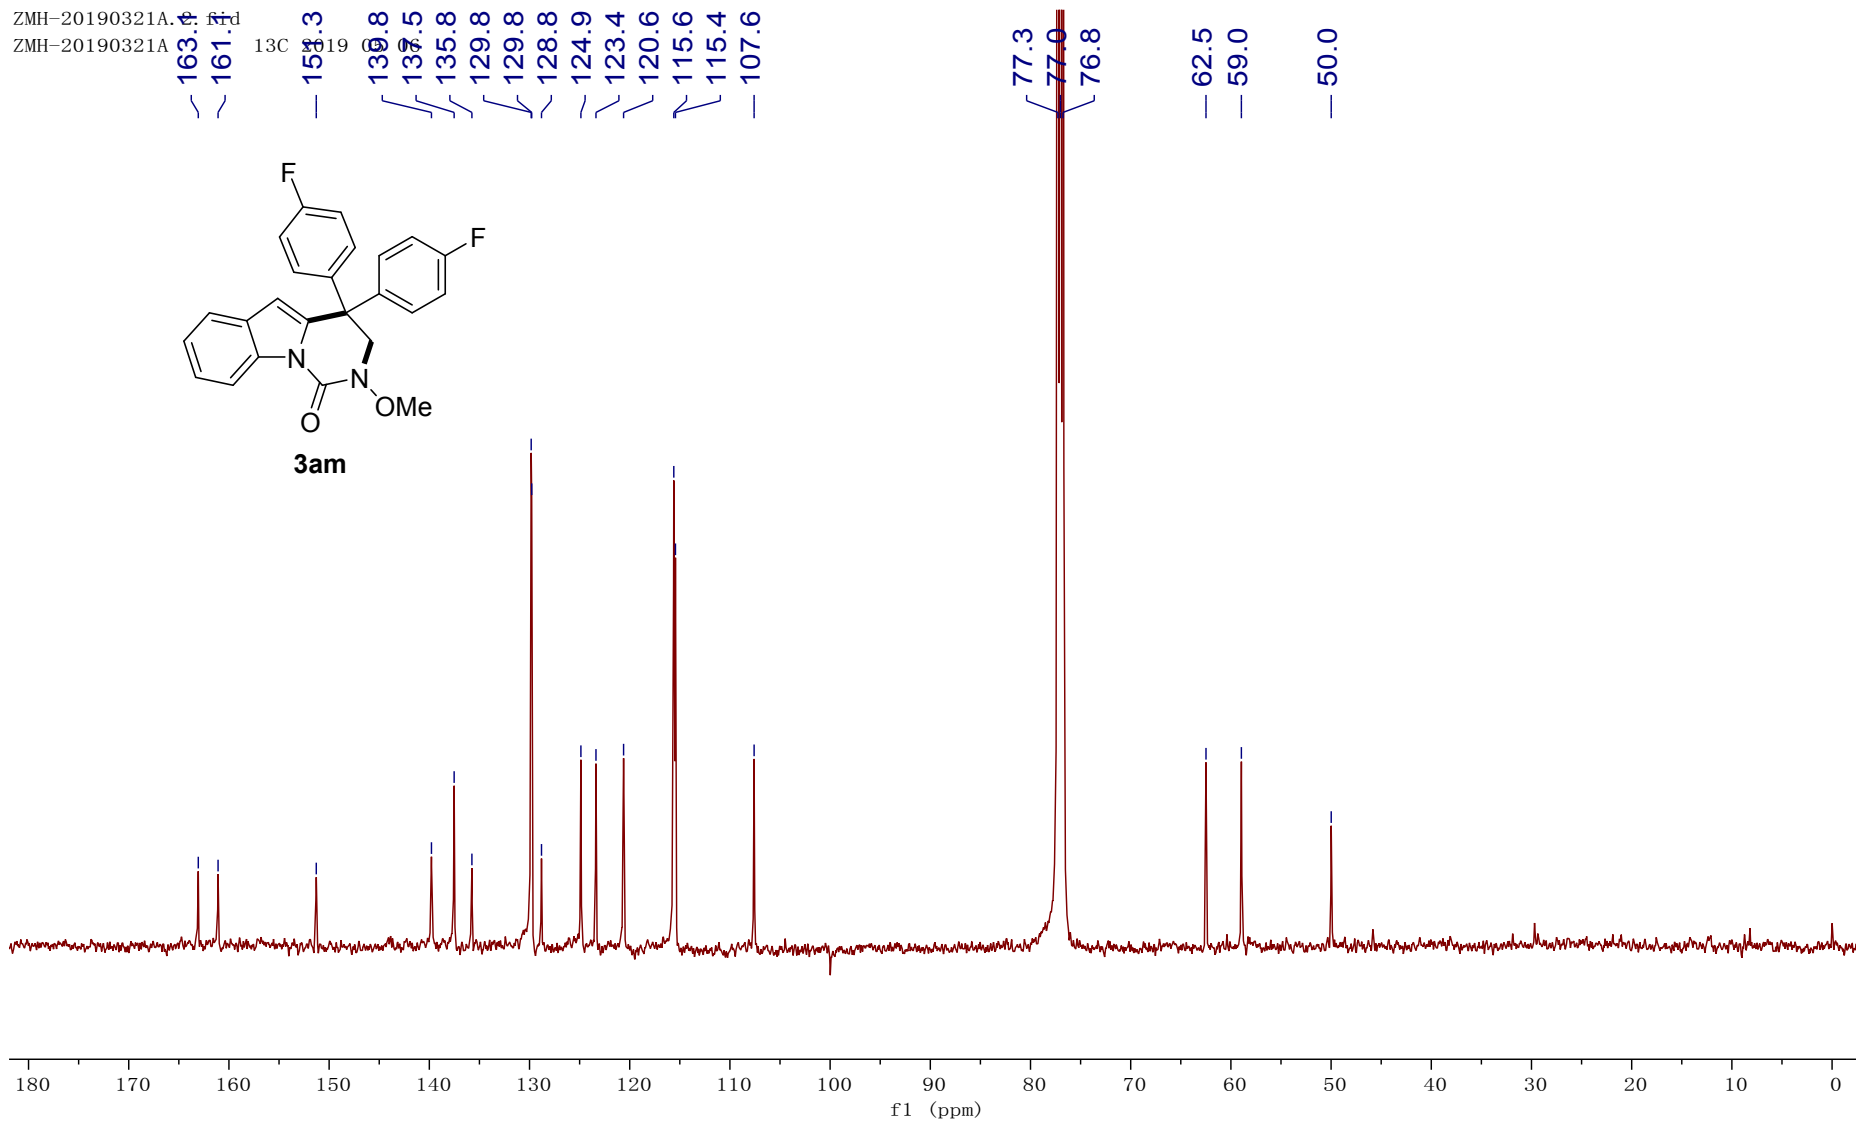

ZMH-20190320A. 1. f1  
ZMH-20190320A

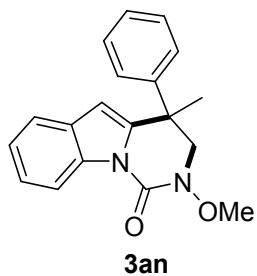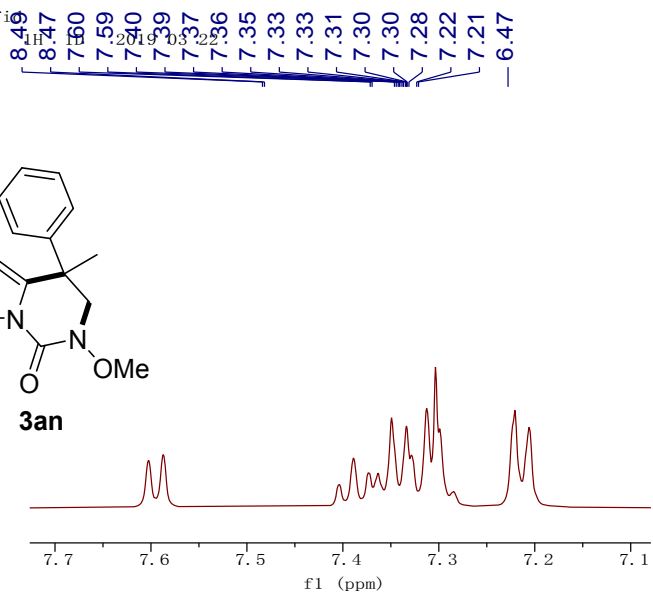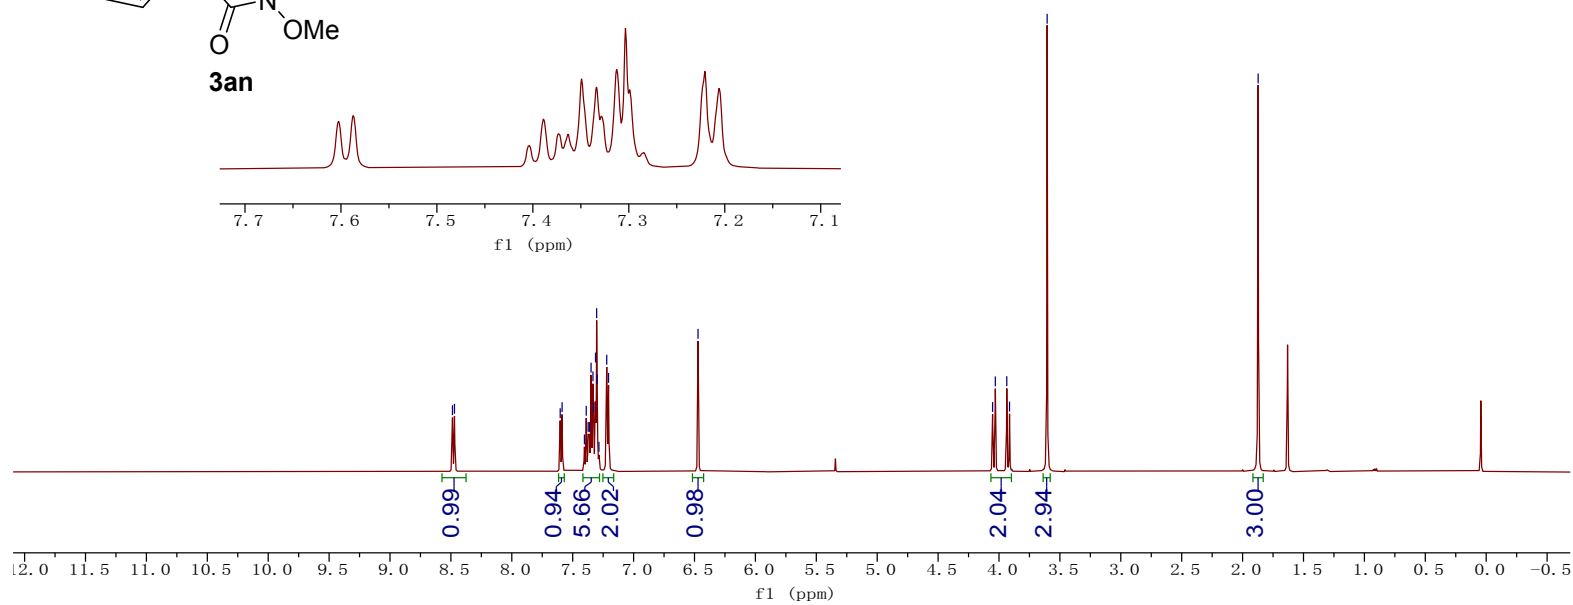

ZMH-20190320A. 2. fid  
ZMH-20190320A 13C 20190403

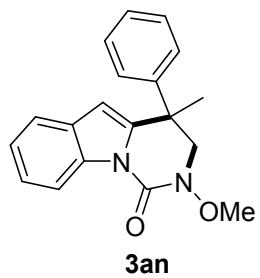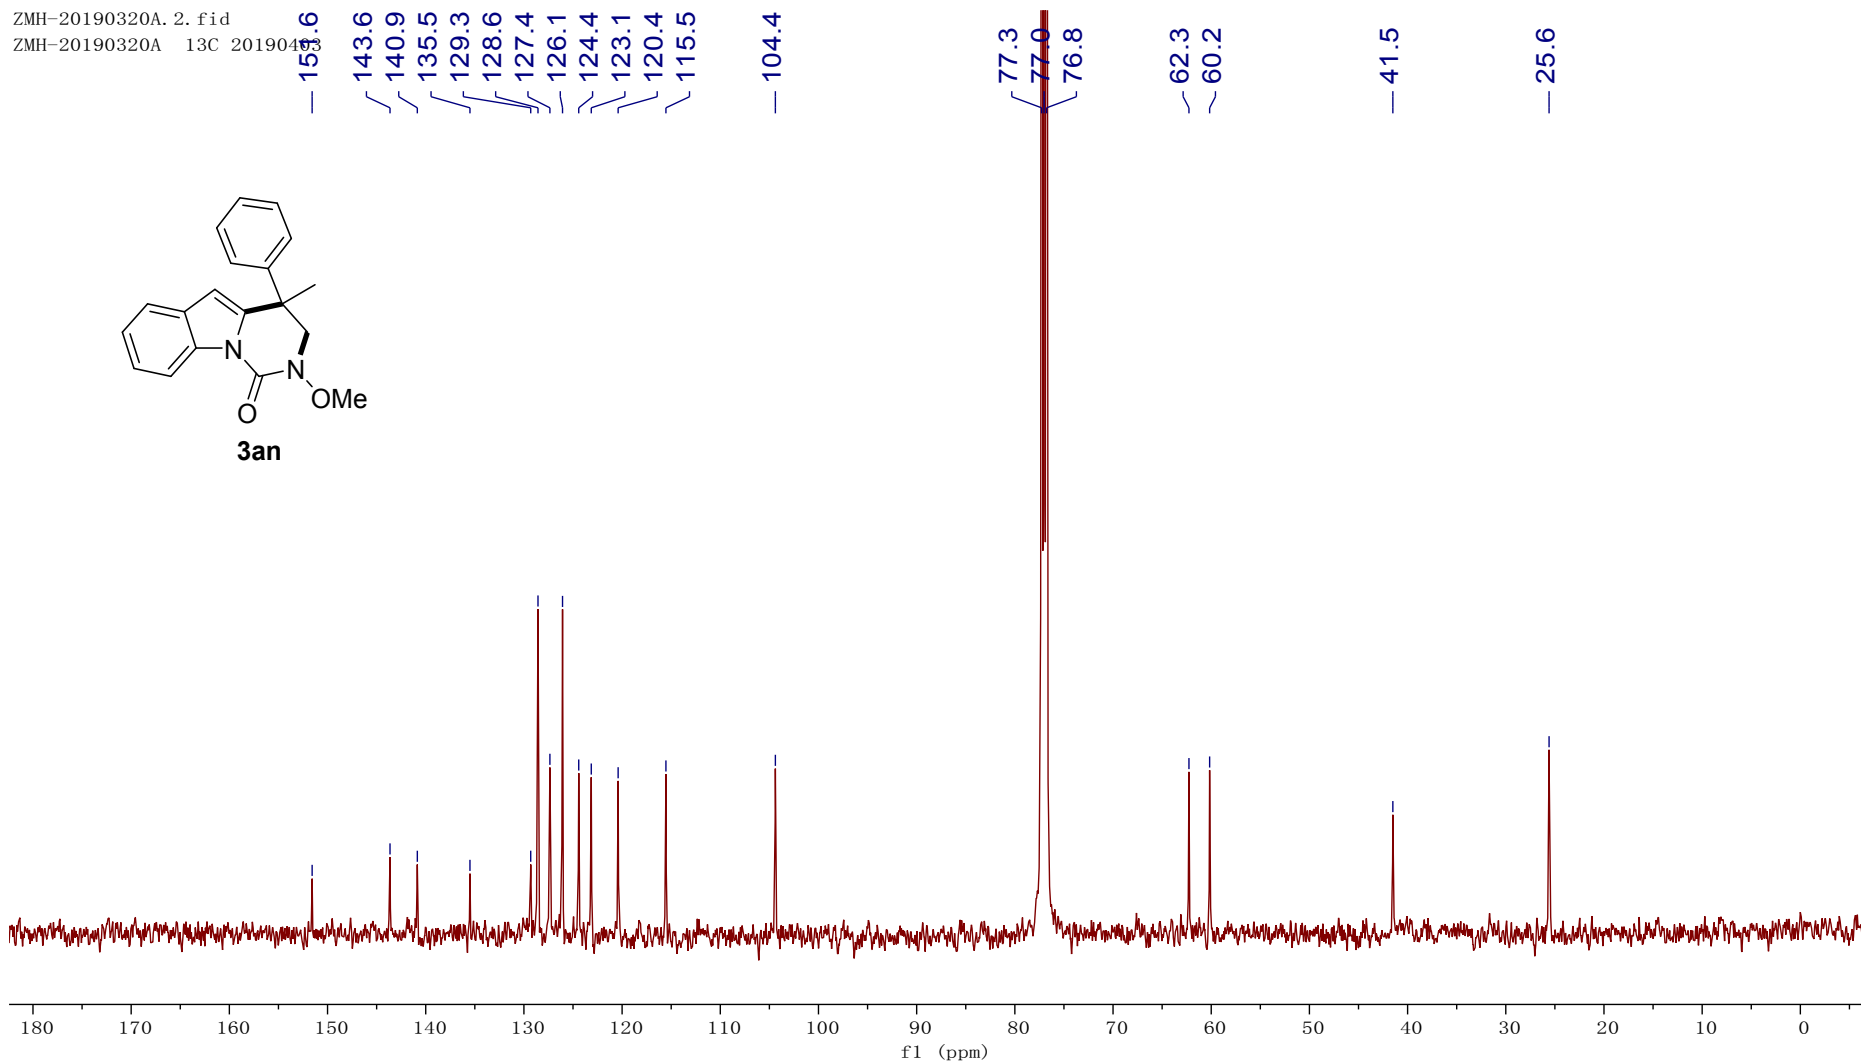

ZMH-20190318B.1.fid  
PROTON CDC13 {E:\data\liming} 1m 9

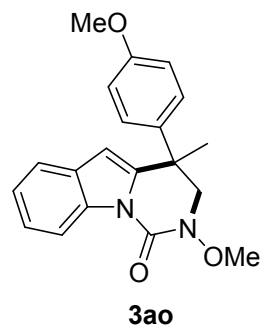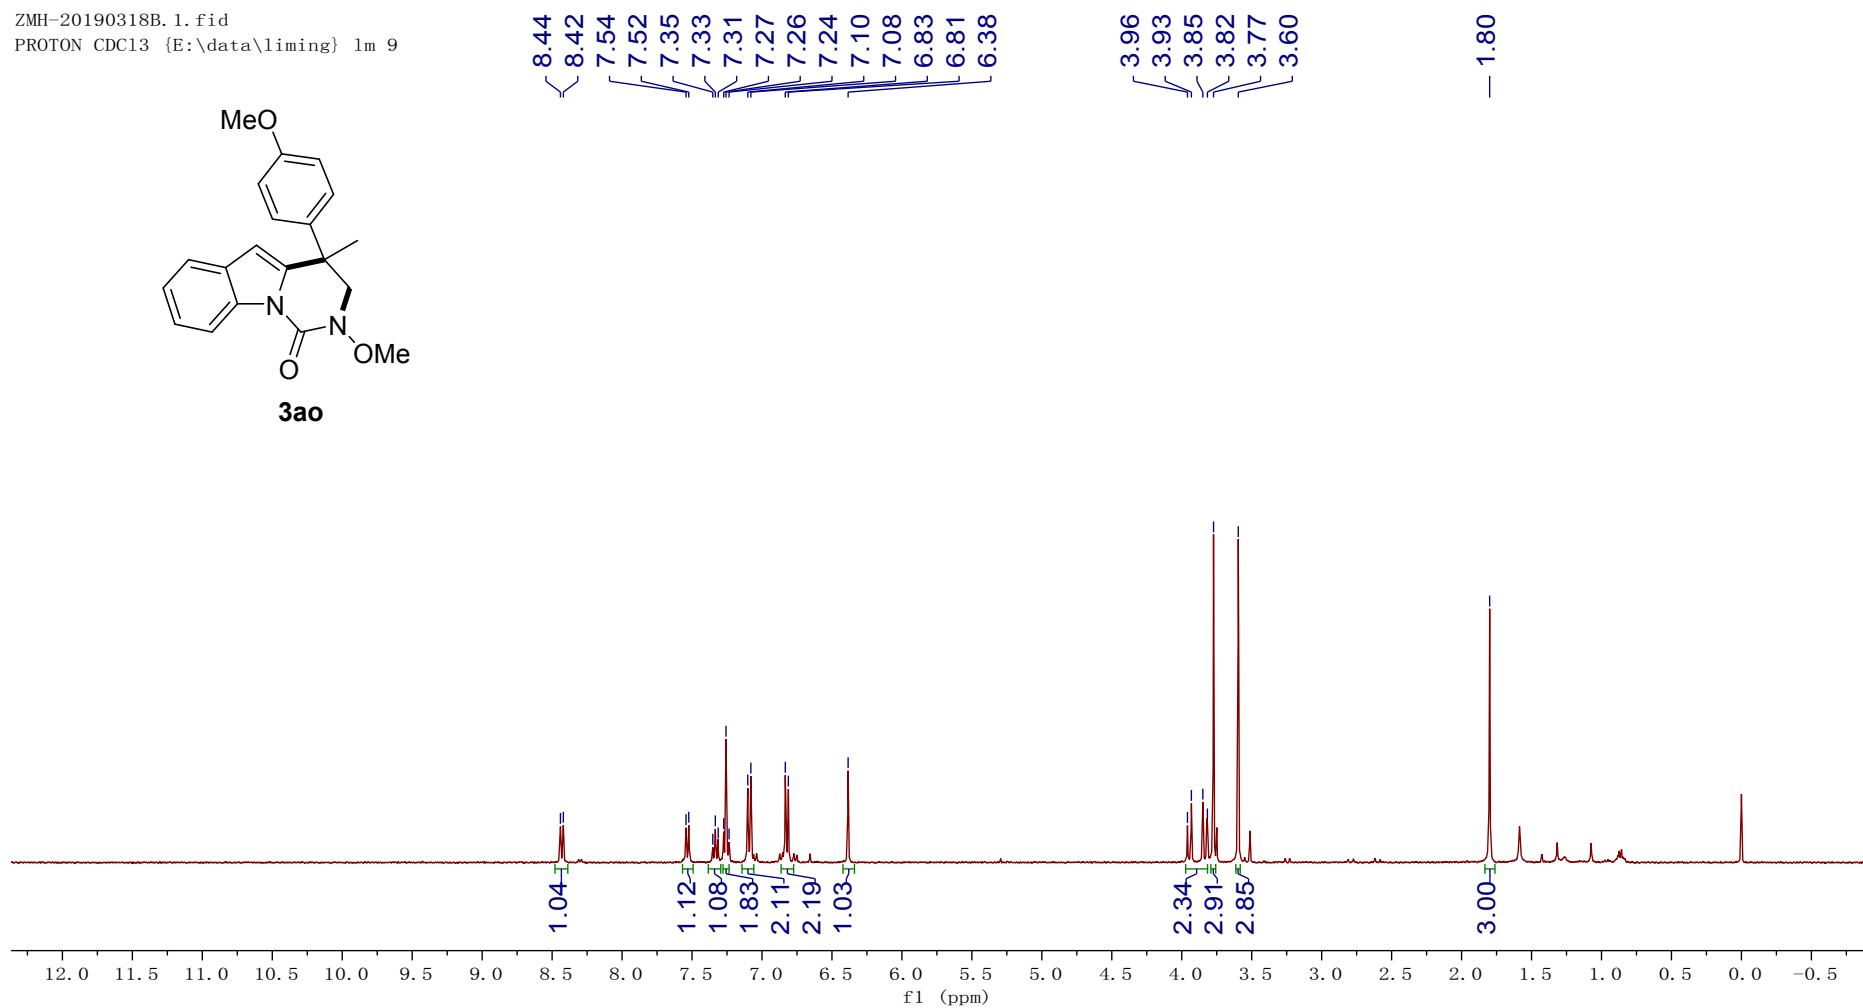

ZMH-20190318B. 2. fid  
ZMH-20190318B 13C 20190403

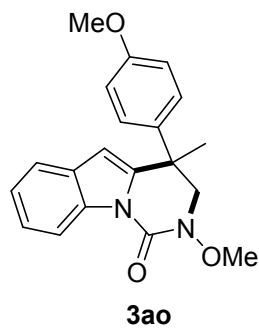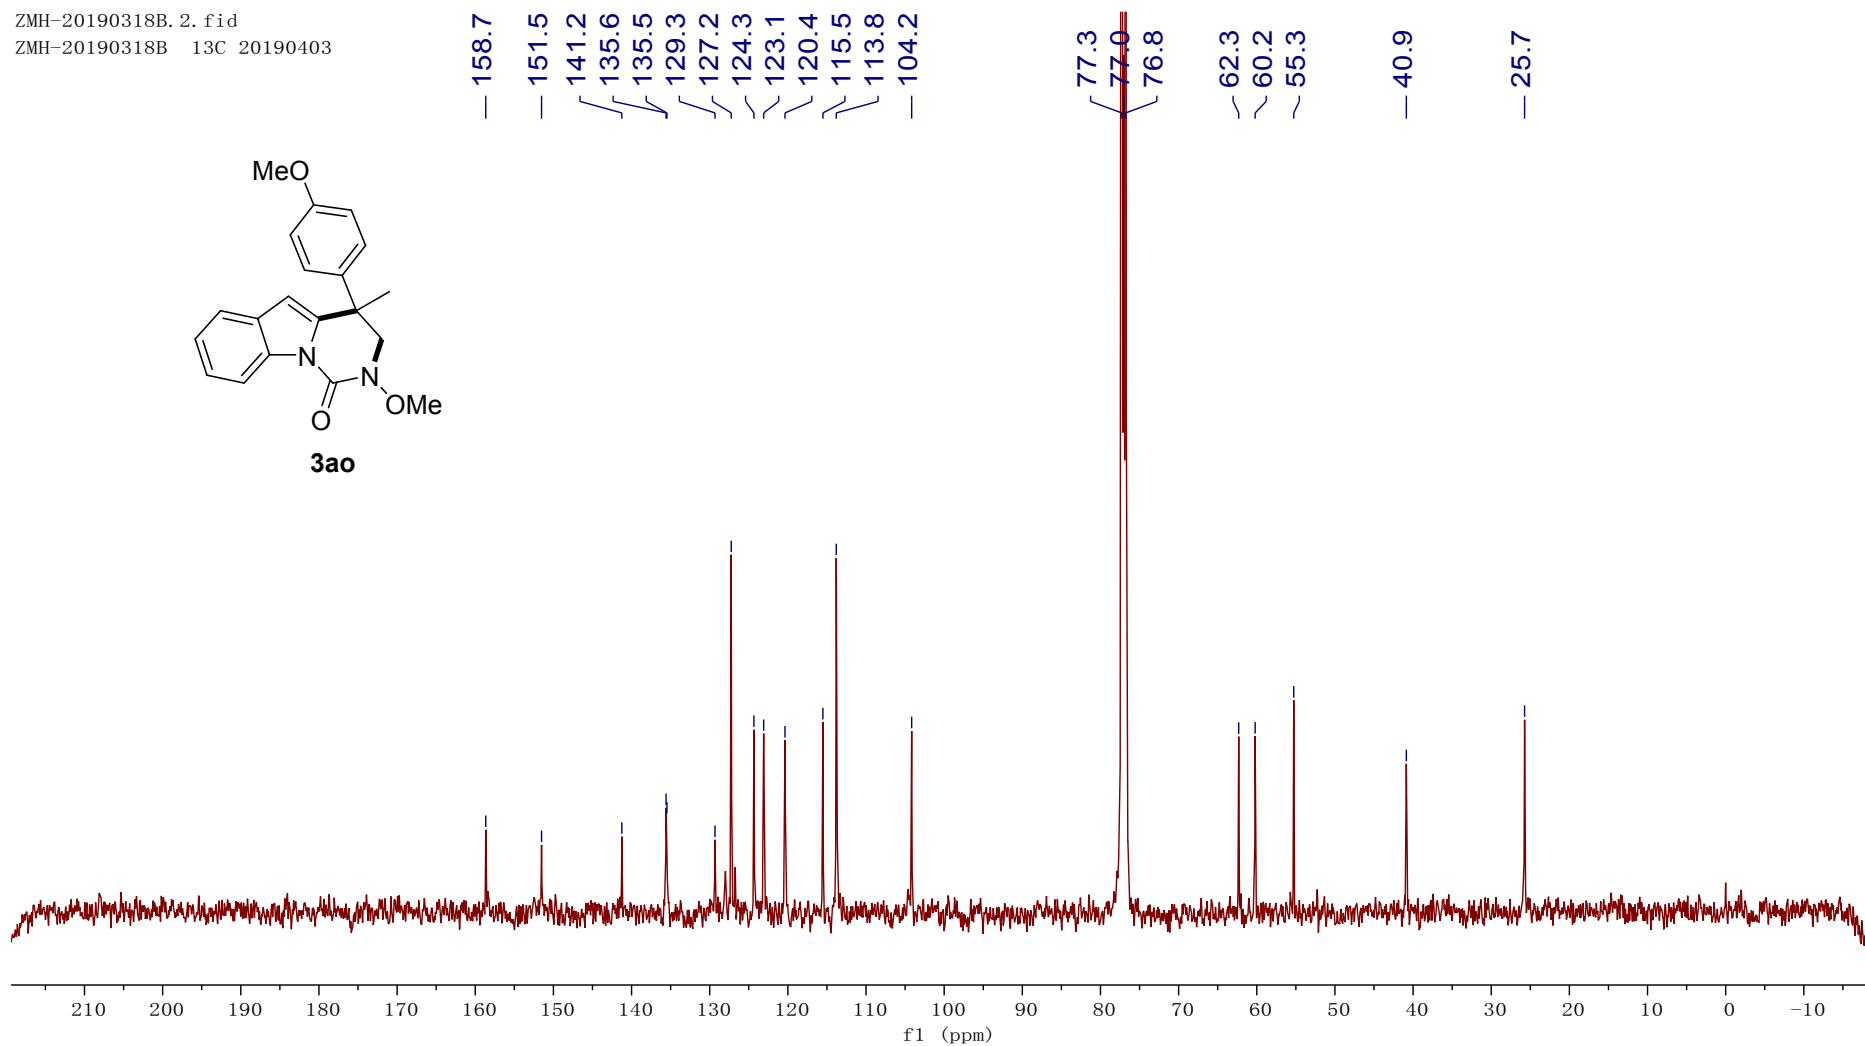



ZMH-A-3AH/1  
ZMH-A-3AH

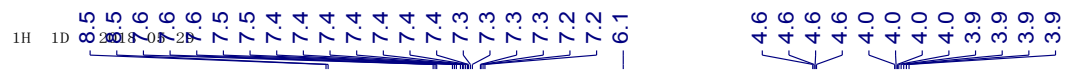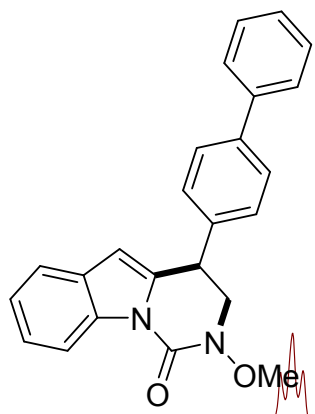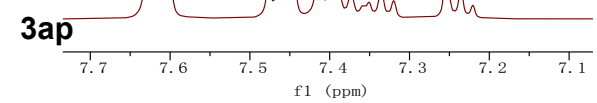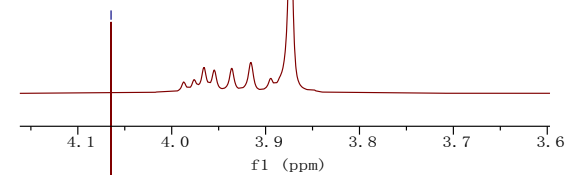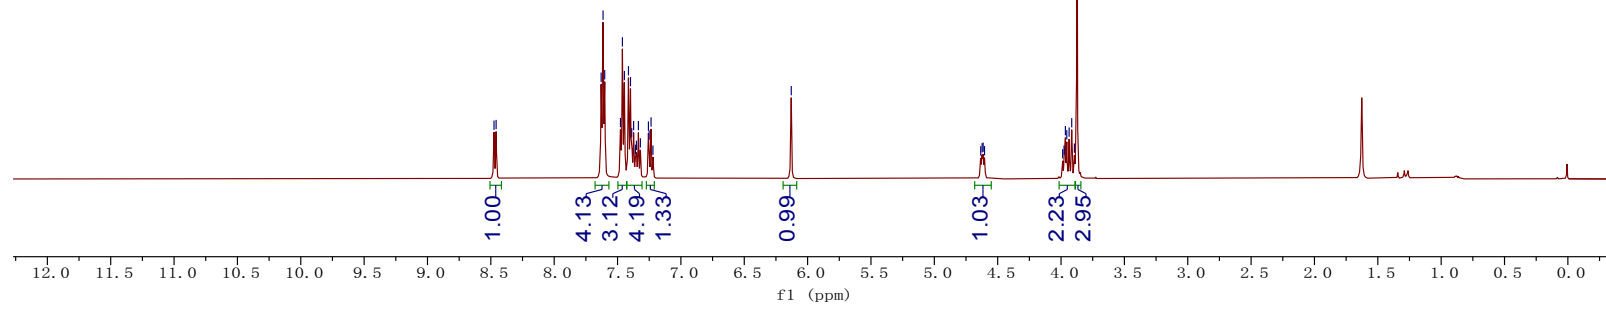

ZMH-A-3AH. 2. fid  
ZMH-A-3AH 13C 1D

152.5  
149.0  
149.3  
137.3  
137.2  
135.5  
129.5  
128.8  
128.7  
127.6  
127.0  
124.3  
123.2  
120.3  
115.5  
— 105.3

77.2  
77.0  
76.7  
— 62.8  
— 54.6  
— 40.6

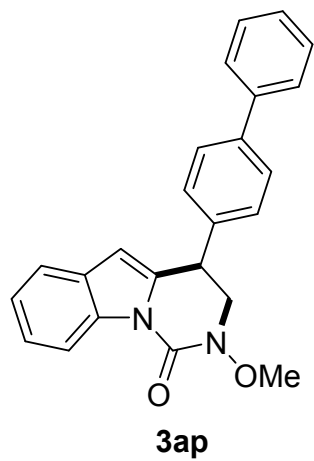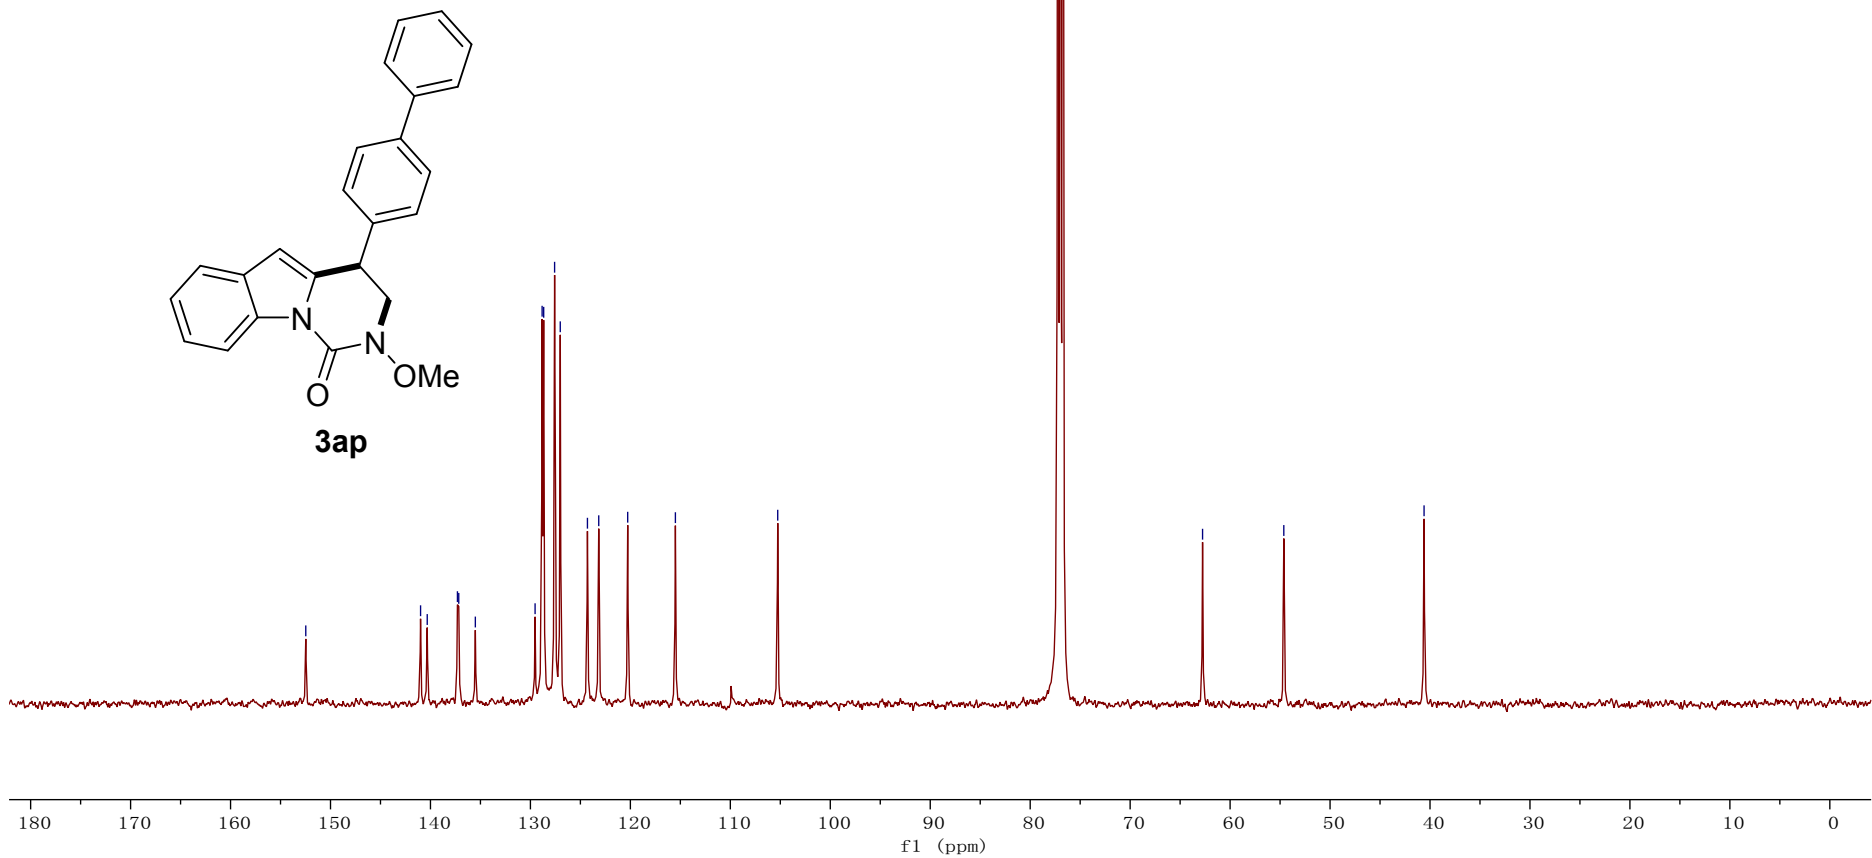

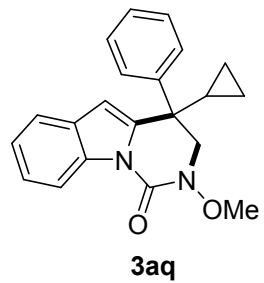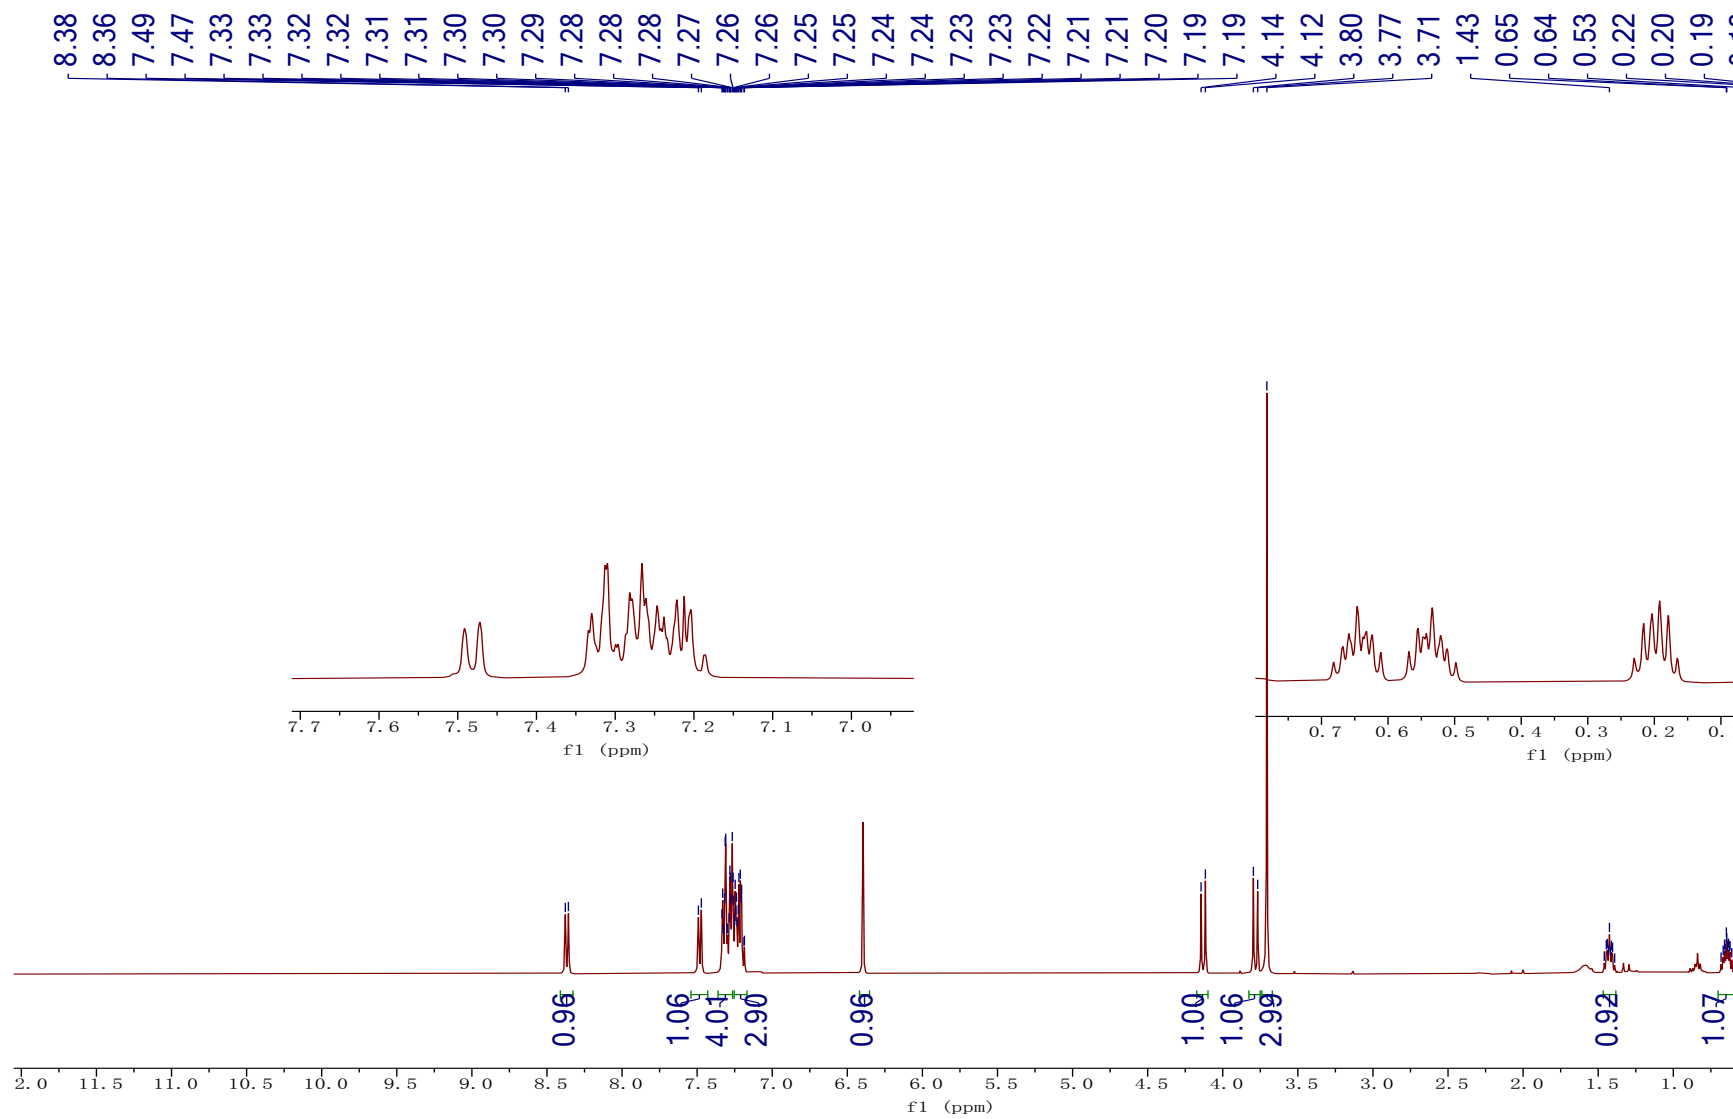

d-3aq. 2. fid  
D-3AQ

151.62  
140.03  
139.43  
135.46  
129.13  
128.24  
127.89  
127.54  
124.36  
123.09  
120.37  
115.54  
106.17  
77.30  
77.04  
76.97  
62.40  
58.91  
45.54  
4.11  
4.11  
4.11  
29.70  
18.64

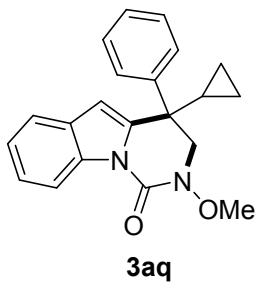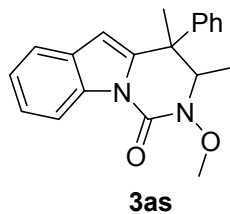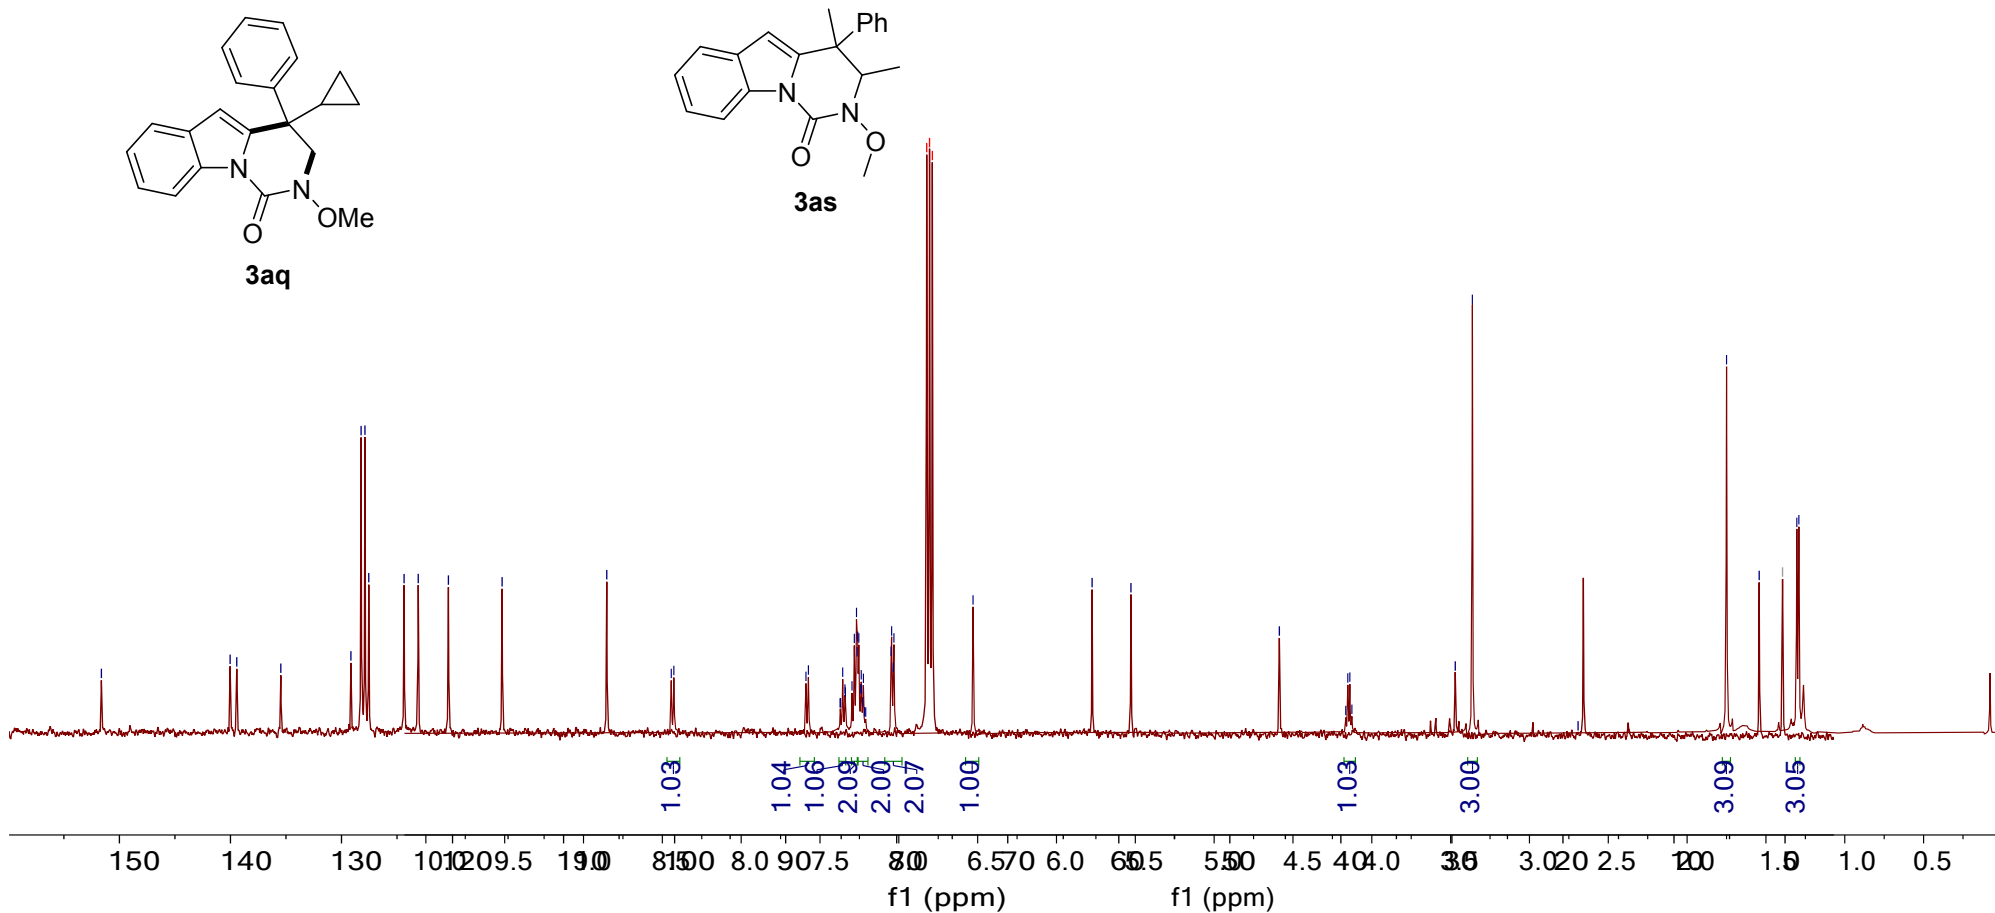

DWB-191018-H. 2. fid  
DWB-191018-H

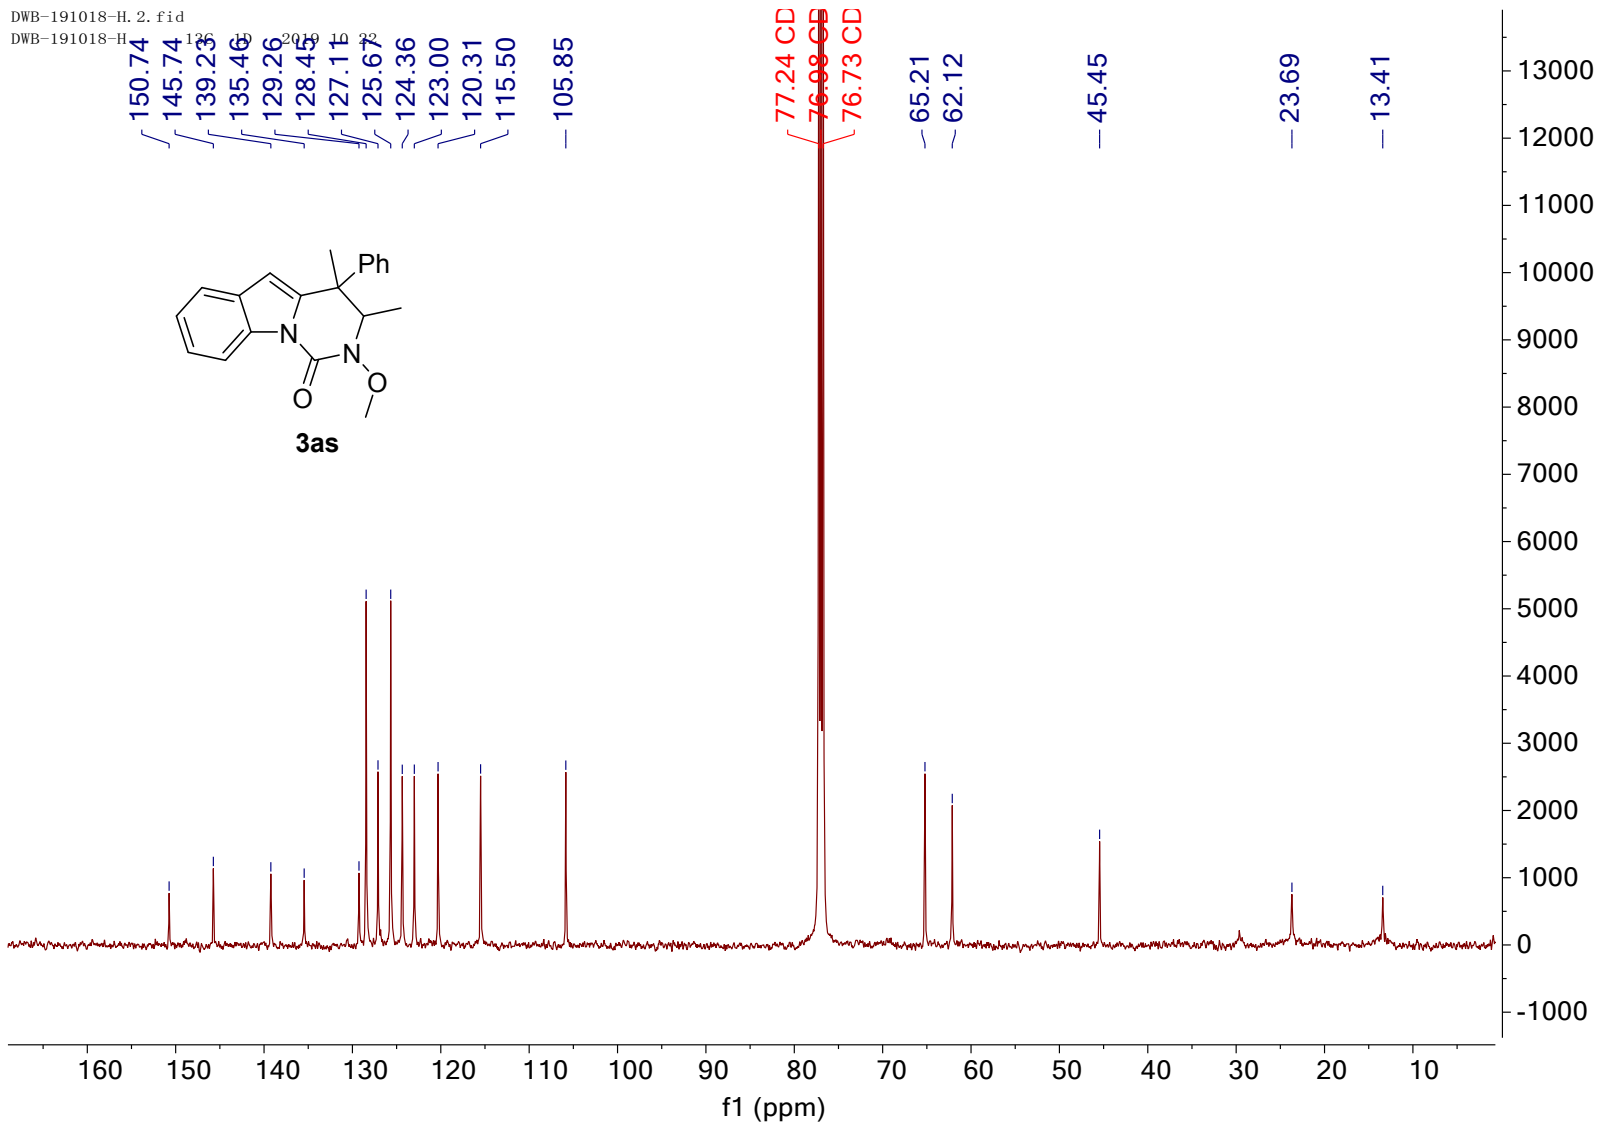

ZMH-A-3BAL.1.fid  
ZMH-A-3BAL 1H 1D 2018 06 06

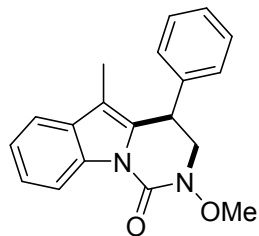

**3ba**

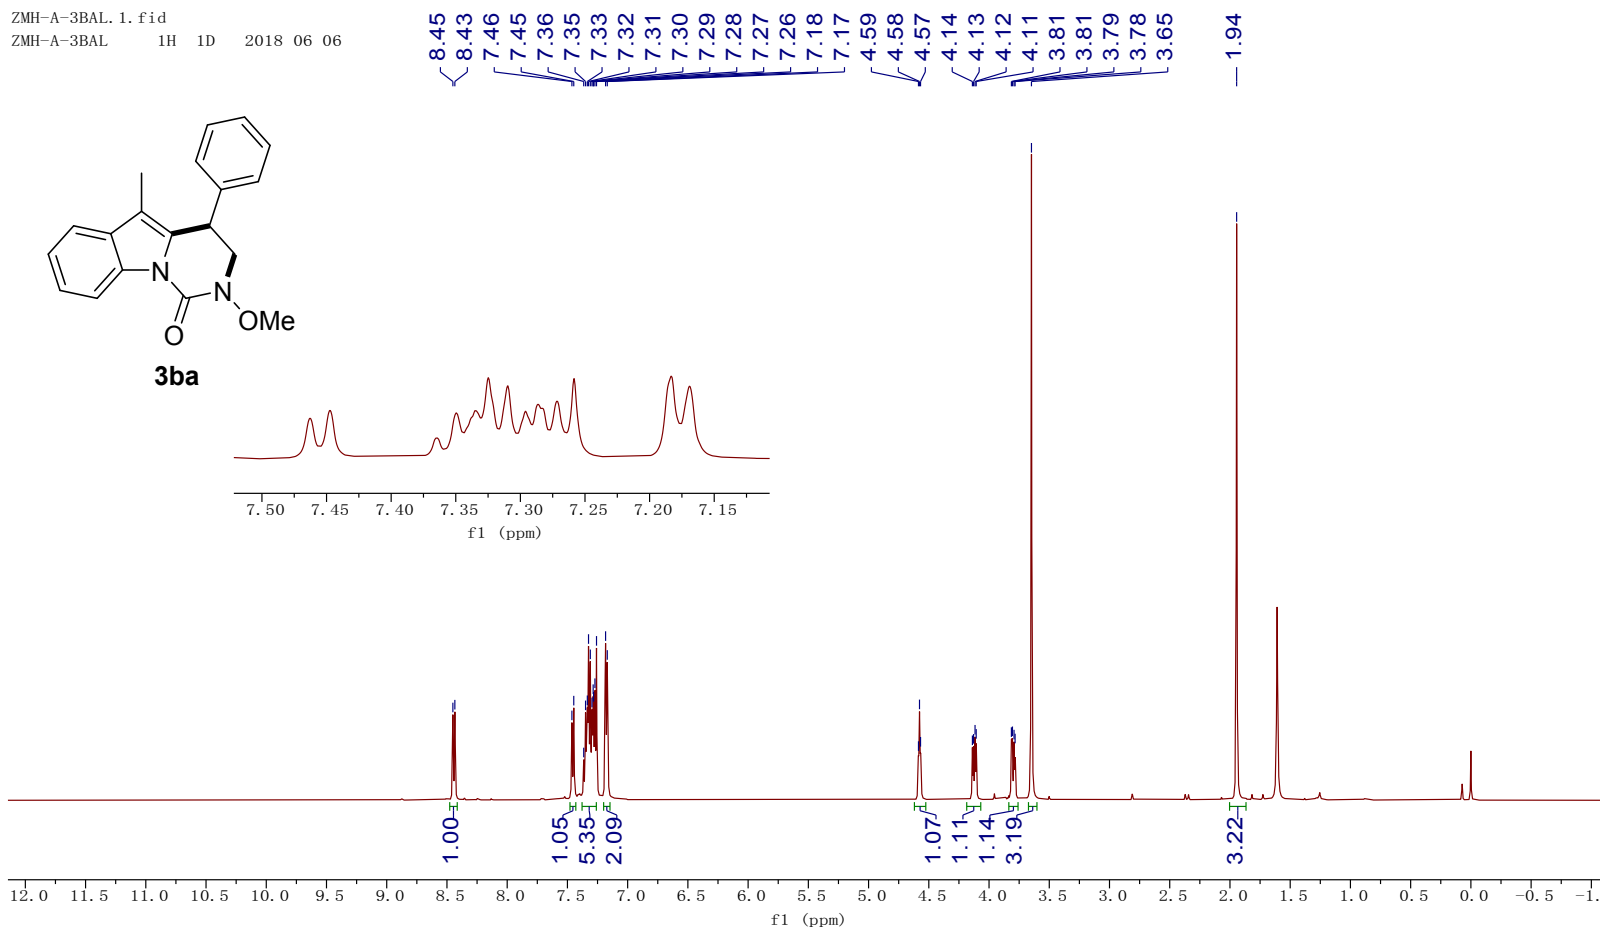

ZMH-A-3BA.2.fid  
ZMH-A-3BA

13C  
20180911  
— 152.5  
139.8  
137.9  
130.9  
130.7  
128.8  
127.5  
124.4  
122.8  
118.3  
115.5  
112.9

77.2  
77.0  
76.7  
— 62.4  
— 55.0  
— 38.6  
— 8.3

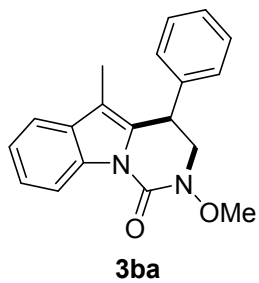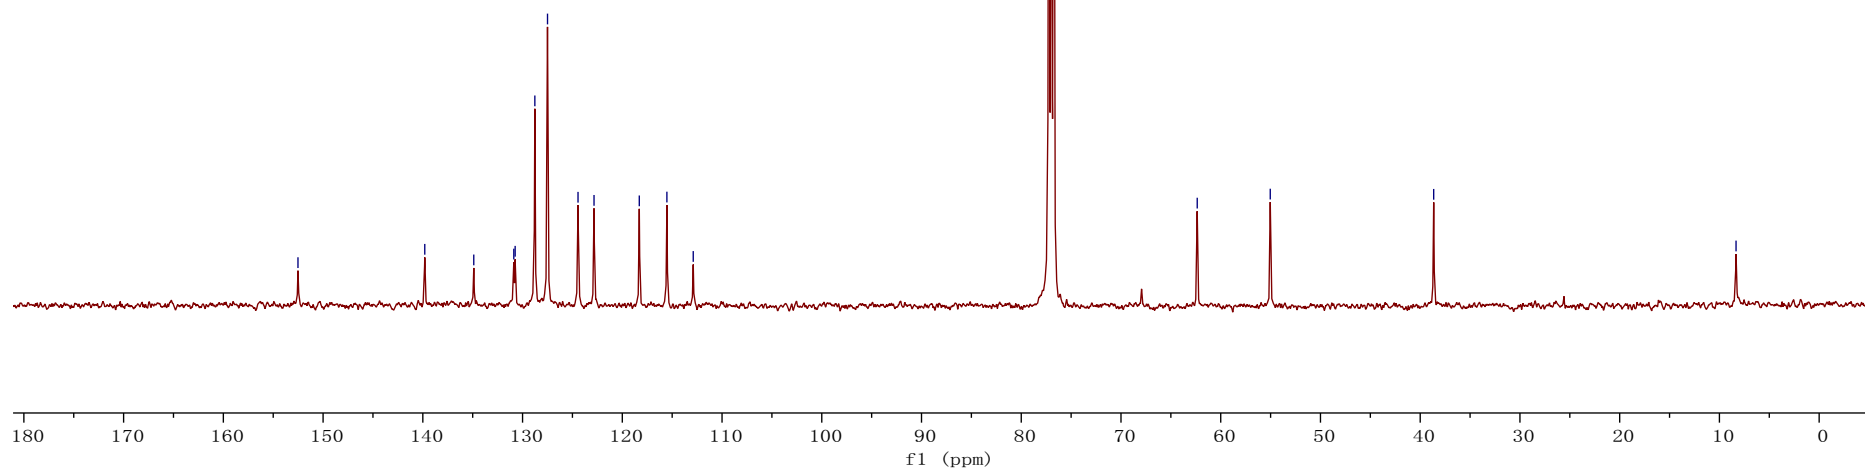

d-3ca.1.fid  
PROTON CDC13 (E:\data\liushaofeng) lsf 21

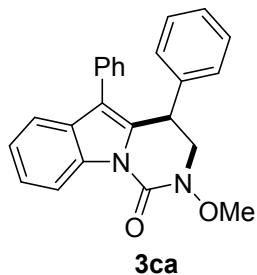

8.56  
8.54  
7.64  
7.62  
7.43  
7.43  
7.41  
7.41  
7.41  
7.39  
7.39  
7.32  
7.32  
7.32  
7.31  
7.31  
7.30  
7.30  
7.29  
7.29  
7.28  
7.28  
7.27  
7.26  
7.24  
7.23  
7.22  
7.14  
7.14  
7.12  
7.12  
4.60  
4.59  
4.58  
4.22  
4.21  
4.19  
4.18  
3.79  
3.79  
3.77  
3.76  
3.54

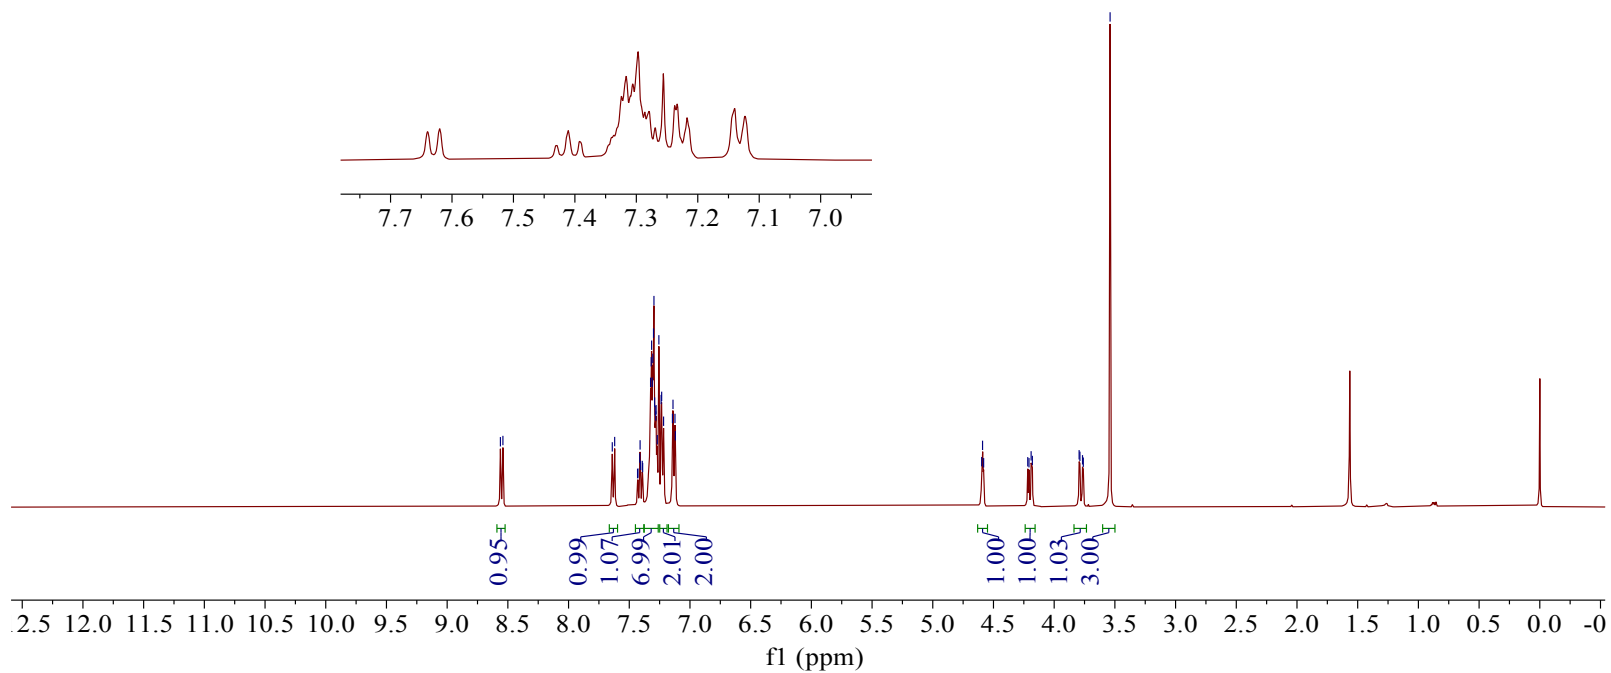



ZMH-A-3UA. 2. fid  
ZMH-A-3UA

13C 1D  
151.8  
141.0  
139.3  
132.5  
130.9  
129.1  
128.8  
128.5  
127.4  
127.3  
127.2  
124.8  
123.3  
119.5  
118.7  
115.7

77.2  
77.0  
76.7

62.1

55.1

38.3

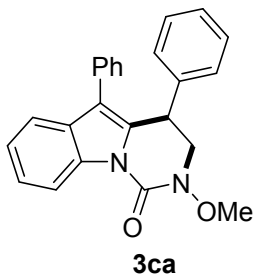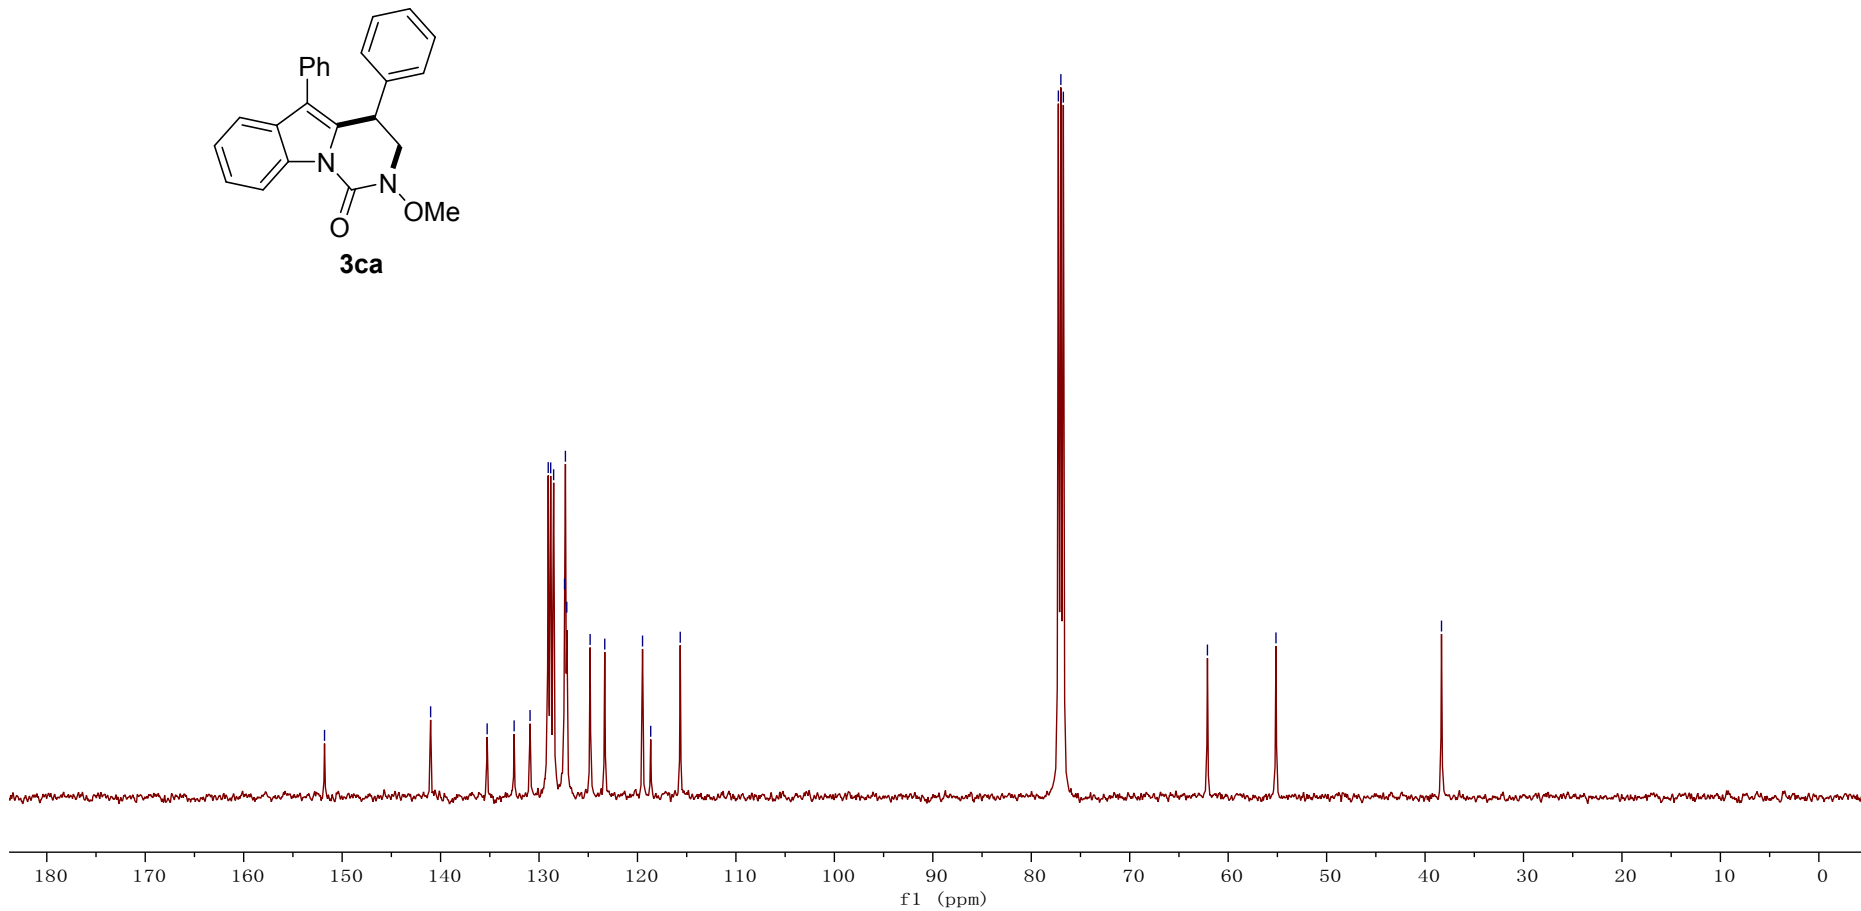

ZMH-A-3DA/1  
ZMH-A-3DA

1H 1D 2018 0417

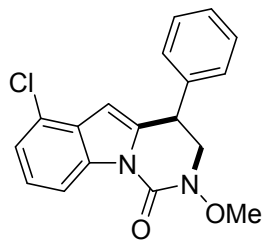

**3da**

8.36  
8.34  
7.43  
7.41  
7.40  
7.39  
7.37  
7.36  
7.34  
7.32  
7.26  
7.24  
7.22  
6.19  
4.60  
4.58  
4.58  
4.57  
3.97  
3.96  
3.95  
3.94  
3.92  
3.90  
3.88  
3.85

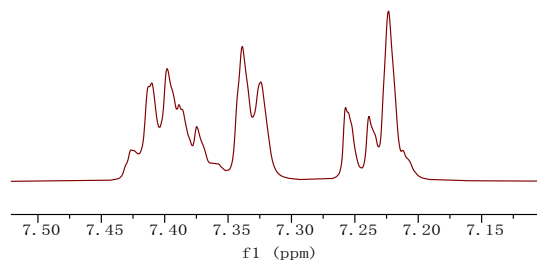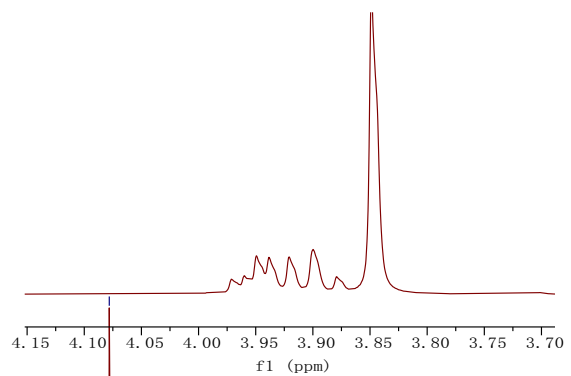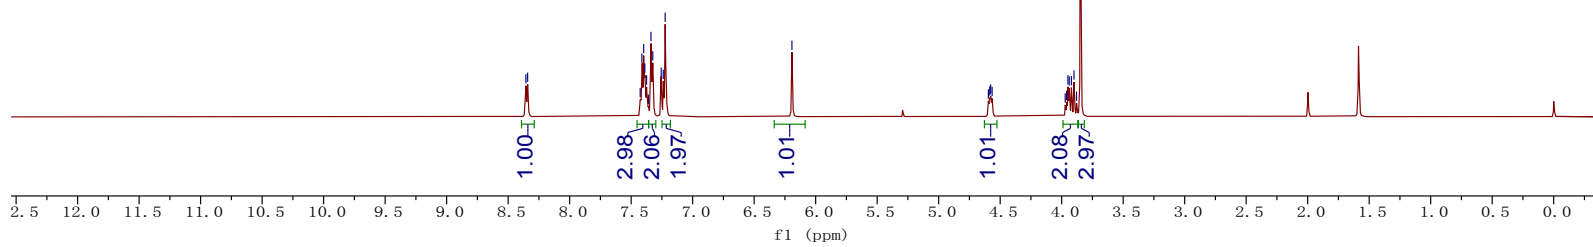

ZMH-A-3DA/20  
ZMH-A-3DA

13C  
— 152.0  
— 138.0  
— 137.8  
— 136.1  
— 129.0  
— 128.2  
— 125.5  
— 125.0  
— 122.9  
— 114.0  
— 103.3

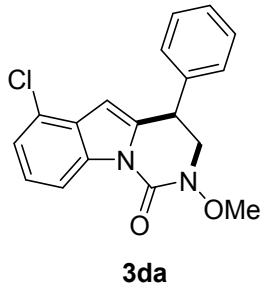

77.2  
77.0  
76.7  
— 62.7  
— 54.5  
— 40.9

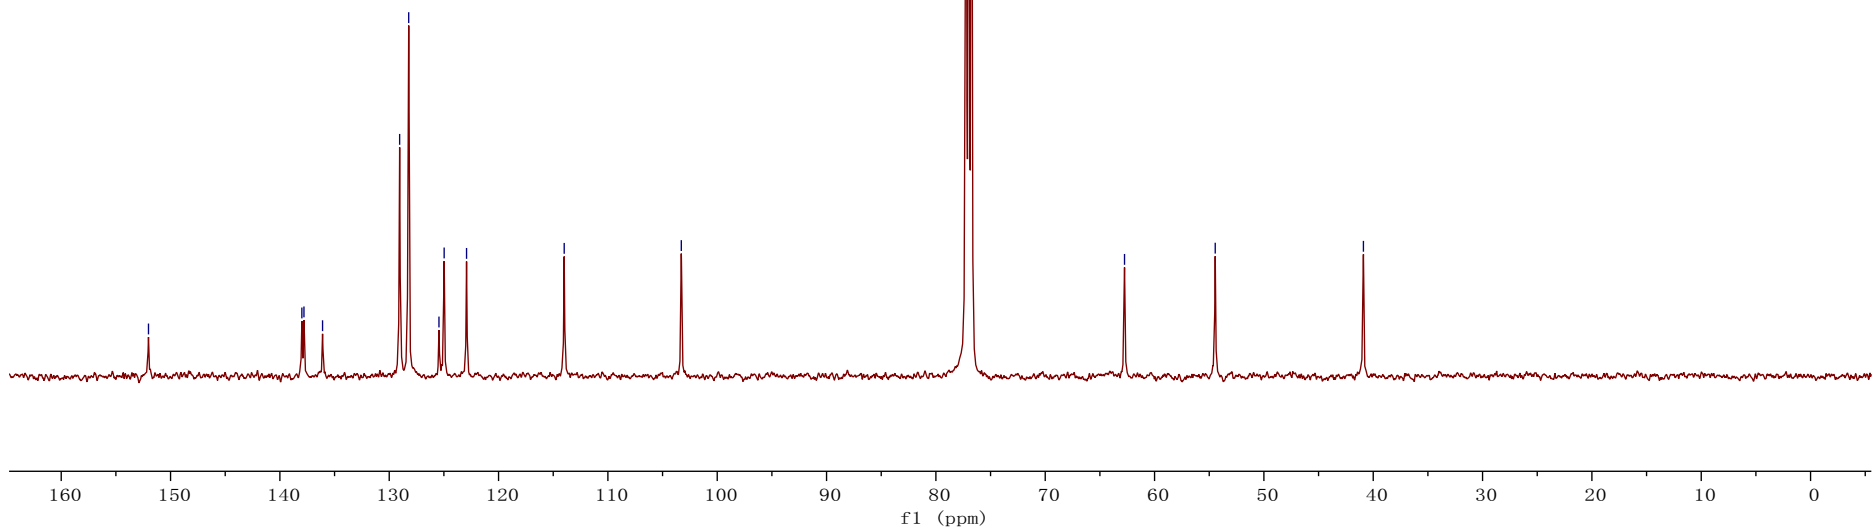

ZMH-A-3EA/1  
ZMH-A-3EA

1H 1D 2018 04 13

8.07  
8.05  
7.40  
7.39  
7.37  
7.36  
7.35  
7.34  
7.32  
7.27  
7.26  
7.26  
7.24  
6.69  
6.67  
— 6.19  
4.57  
4.56  
4.55  
4.54  
3.95  
3.94  
3.93  
3.92  
3.91  
3.88  
3.85

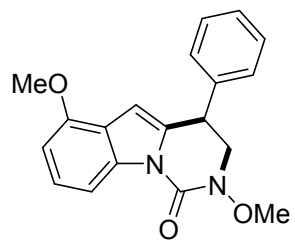

3ea

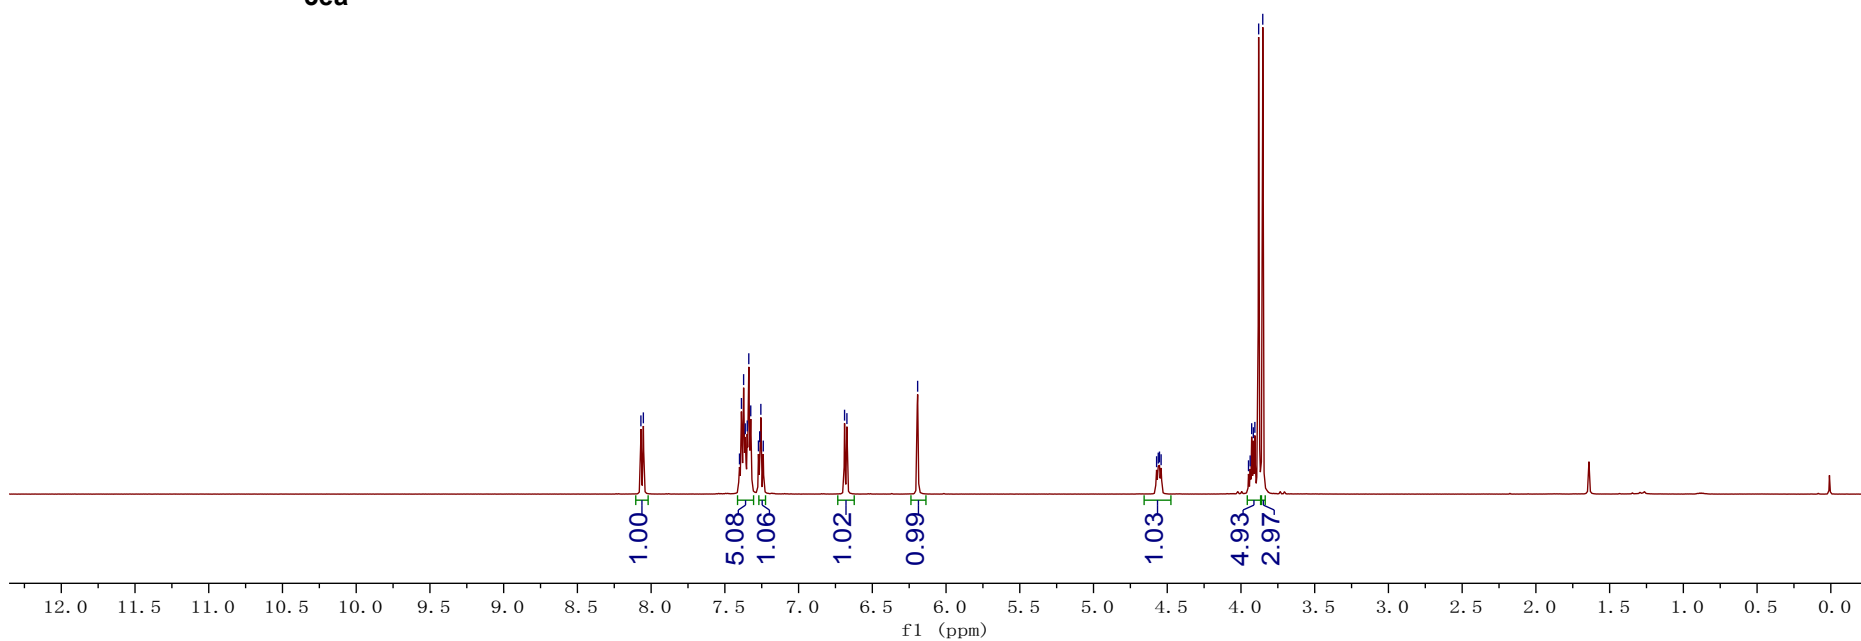

ZMH-A-3EA/2  
ZMH-A-3EA

— 152.4

13C 1D

138.3

136.7

135.7

128.9

128.2

128.0

125.2

119.7

— 108.6

103.5

102.2

— 62.7

55.3

54.6

— 40.9

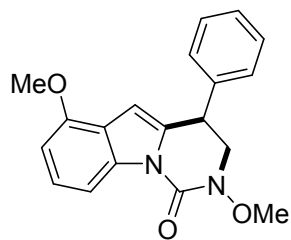

**3ea**

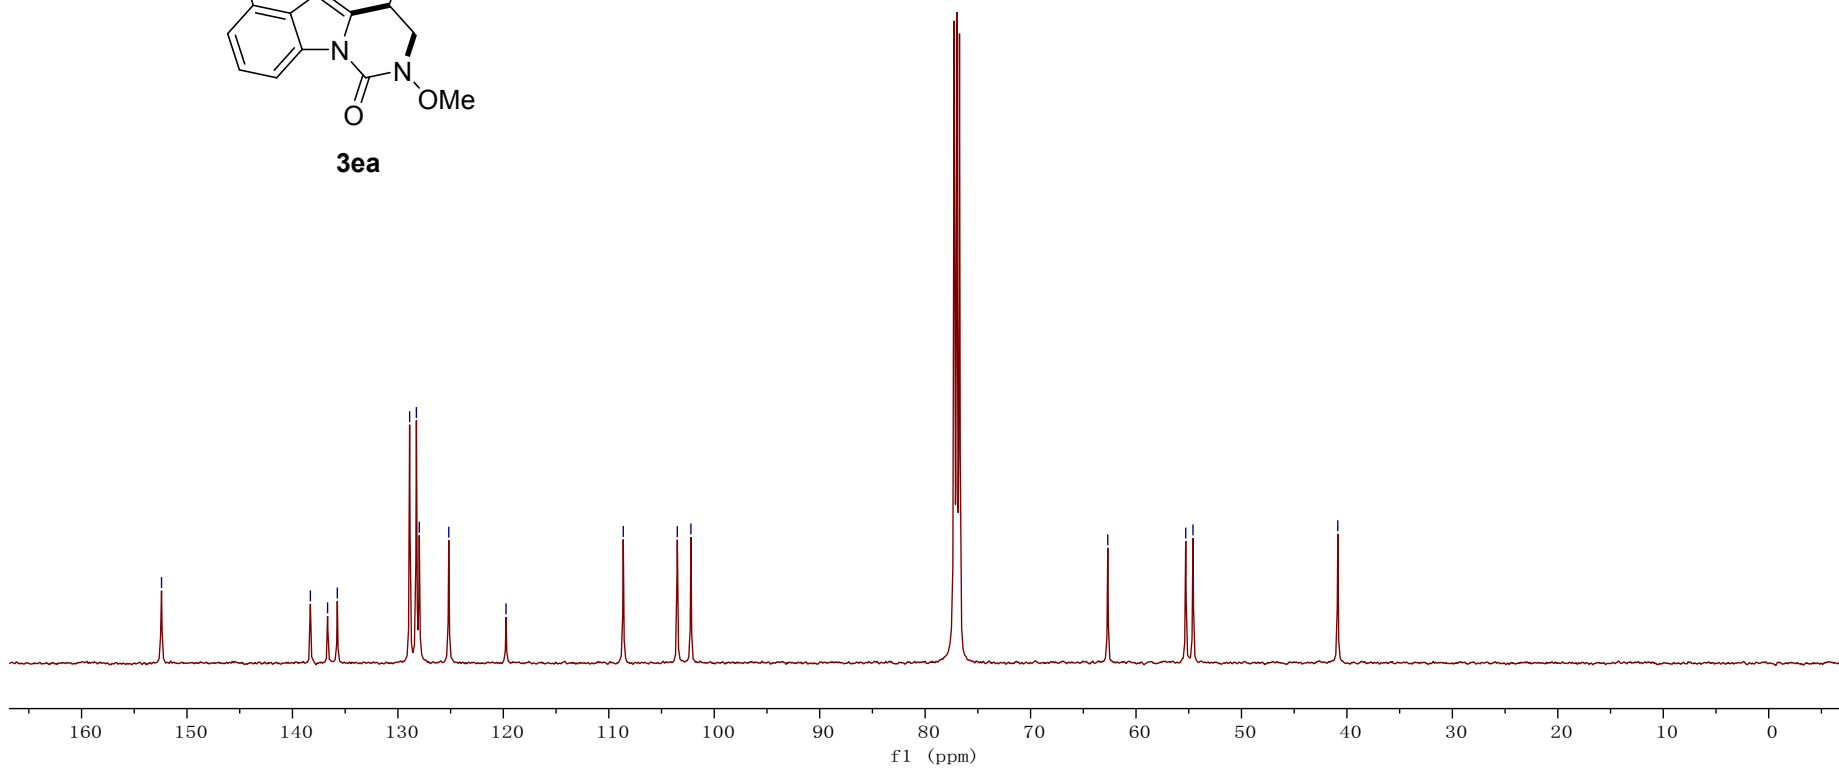

ZMH-A-3FA/1  
ZMH-A-3FA

1H 1D 2018 05 11

8.69  
8.67  
7.96  
7.94  
7.40  
7.39  
7.37  
7.36  
7.35  
7.35  
7.34  
7.33  
7.33  
7.31  
7.26  
6.81  
4.62  
4.61  
4.60  
4.59  
3.98  
3.97  
3.96  
3.95  
3.92  
3.90  
3.88  
3.84

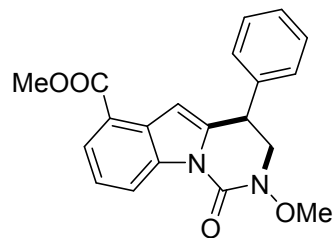

**3fa**

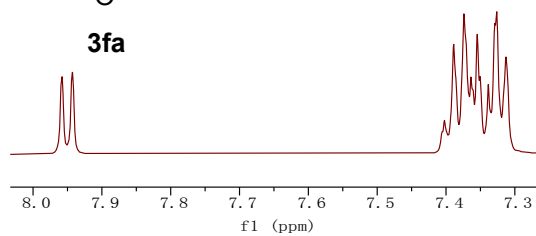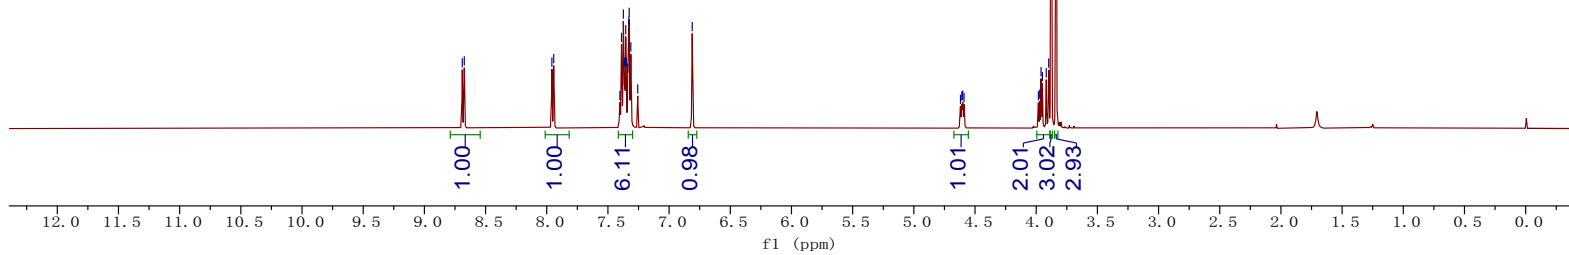

ZMH-A-3FA/2  
ZMH-A-3FA

13C 1D 201001  
— 167.2  
— 152.1  
— 139.2  
— 137.9  
— 136.2  
— 129.7  
— 129.0  
— 128.2  
— 128.1  
— 125.8  
— 123.6  
— 121.3  
— 120.0  
— 105.8  
— 62.7  
— 54.5  
— 51.8  
— 40.9

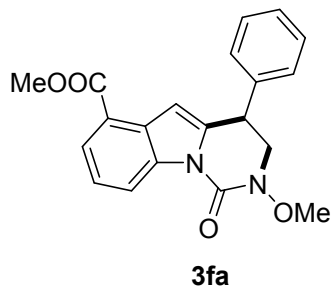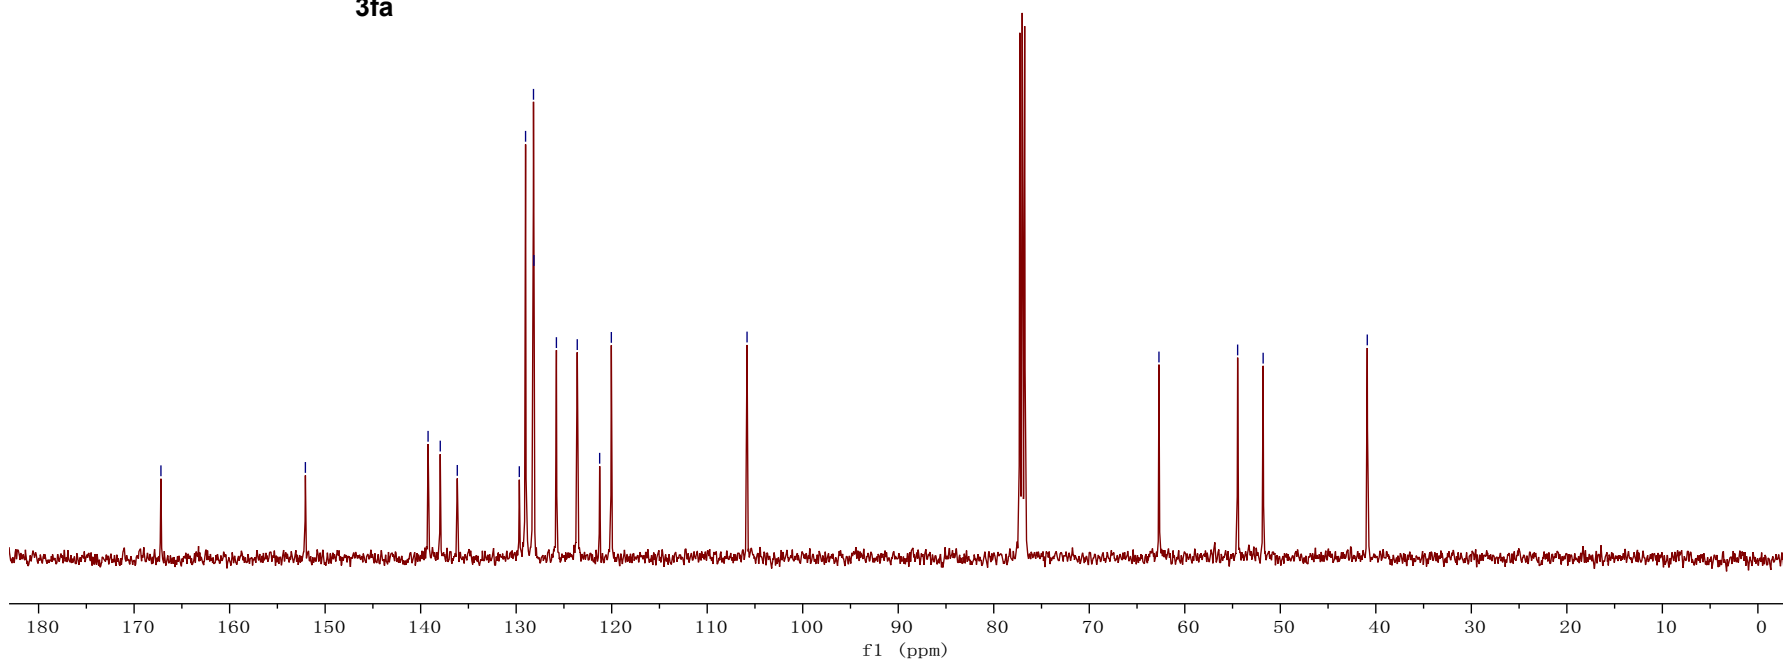

ZMH-A-3KA/1  
ZMH-A-3KA

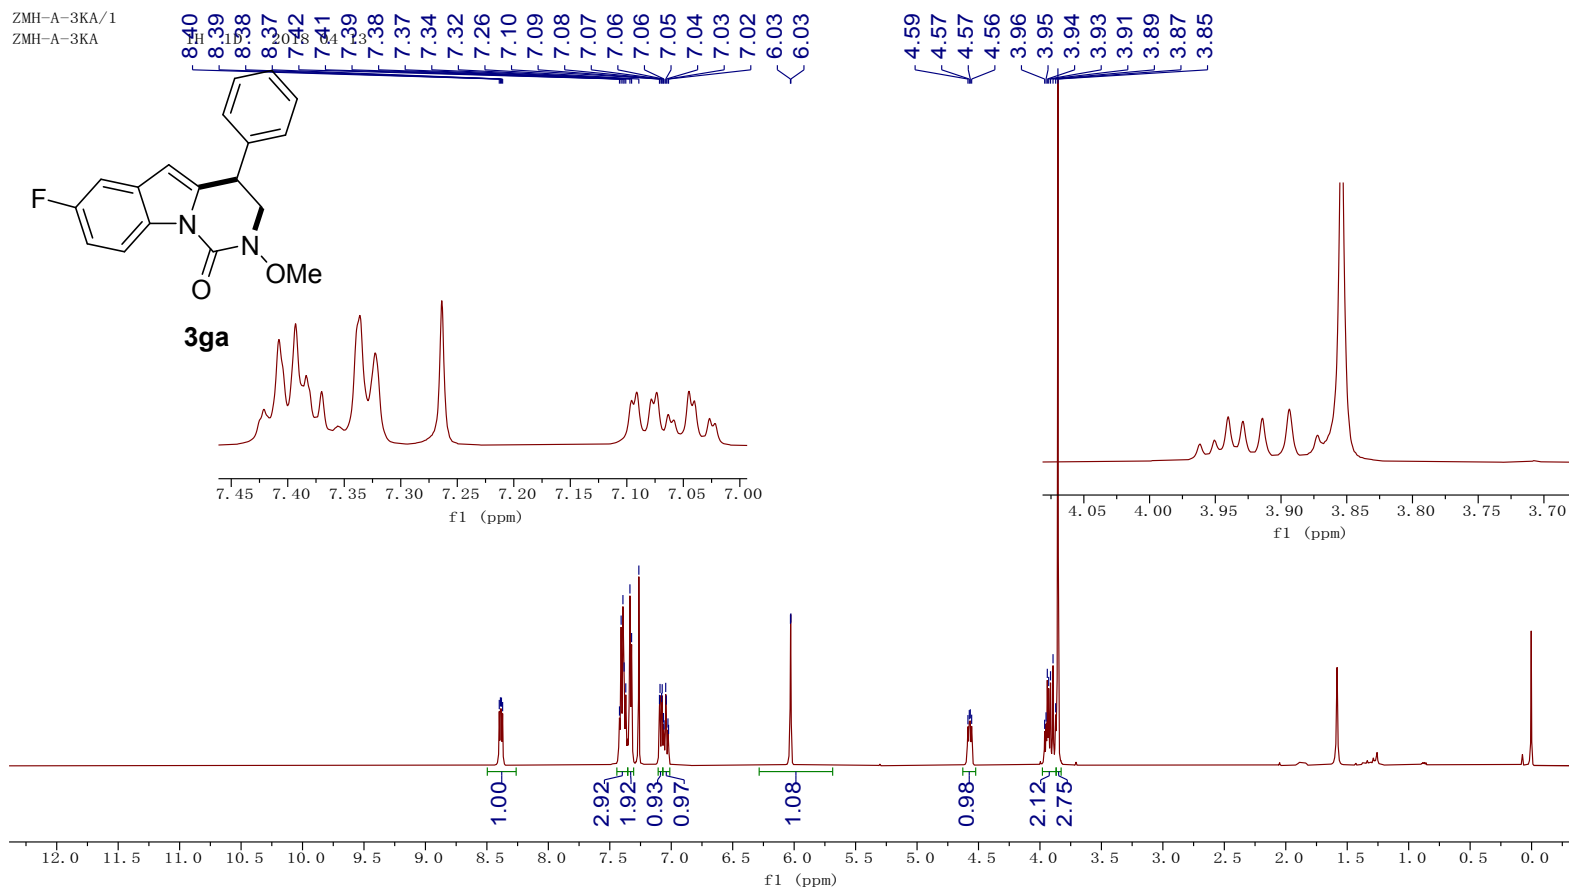



ZMH-A-31  
ZMH-A-31  
169.4  
158.9

152.3

138.9  
138.0  
131.8  
130.4  
130.4  
129.0  
128.2  
116.4  
116.4  
112.1  
111.9  
105.9  
105.7  
104.9

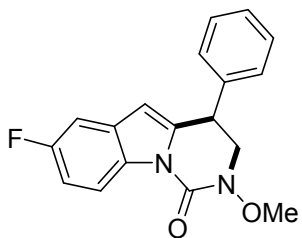

3ga

77.2  
77.0  
76.7

62.8

54.6

40.9

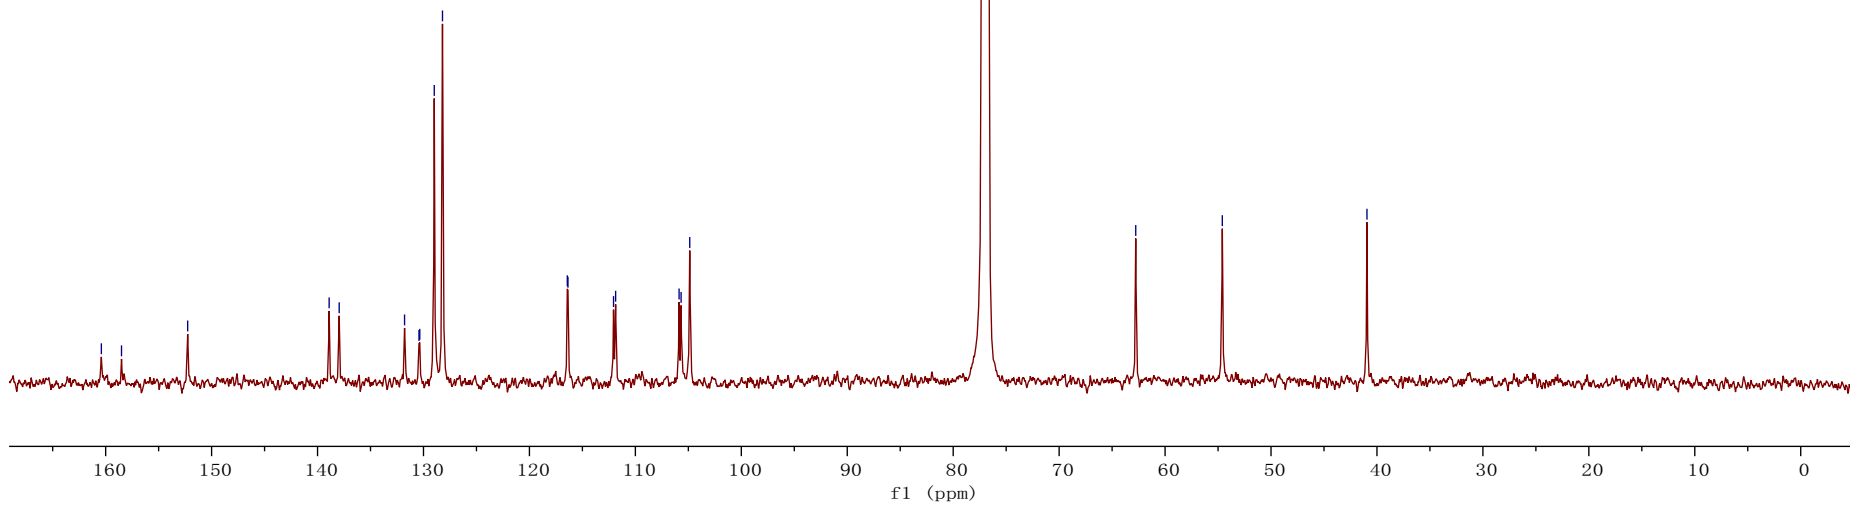

ZMH-A-3IA/1  
ZMH-A-3IA

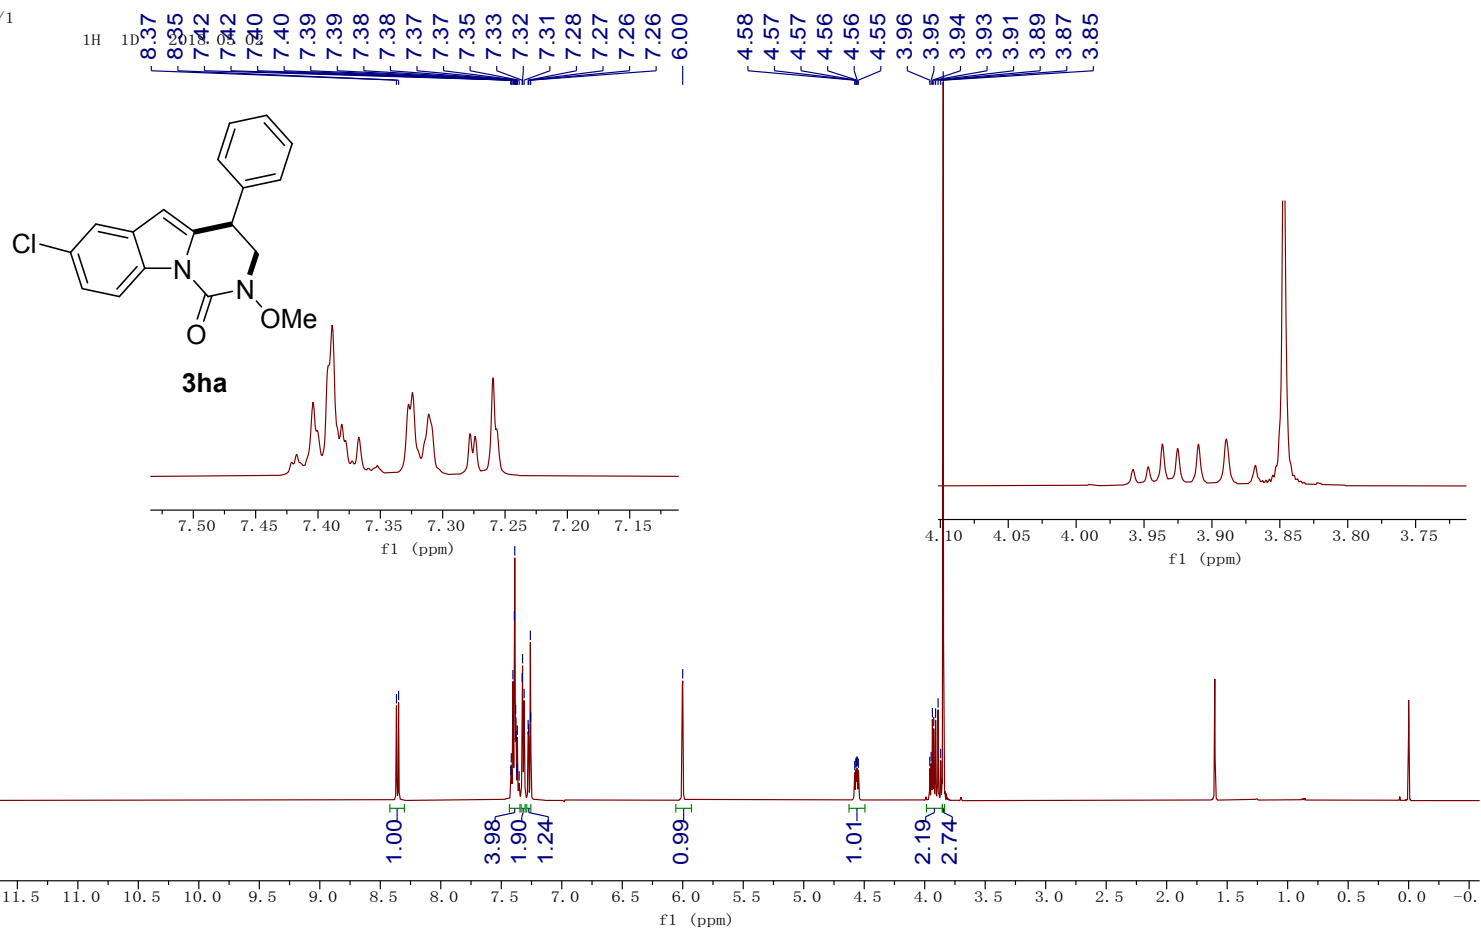

ZMH-A-3IA/  
ZMH-A-3IA

— 152.4  
138.7  
137.9  
133.8  
130.7  
129.0  
128.7  
128.2  
128.4  
119.8  
116.4  
— 104.4

77.2  
77.0  
76.7

— 62.8

— 54.5

— 40.9

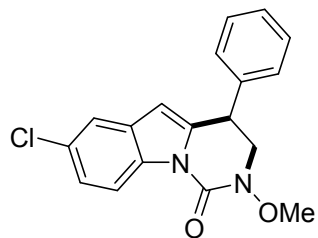

**3ha**

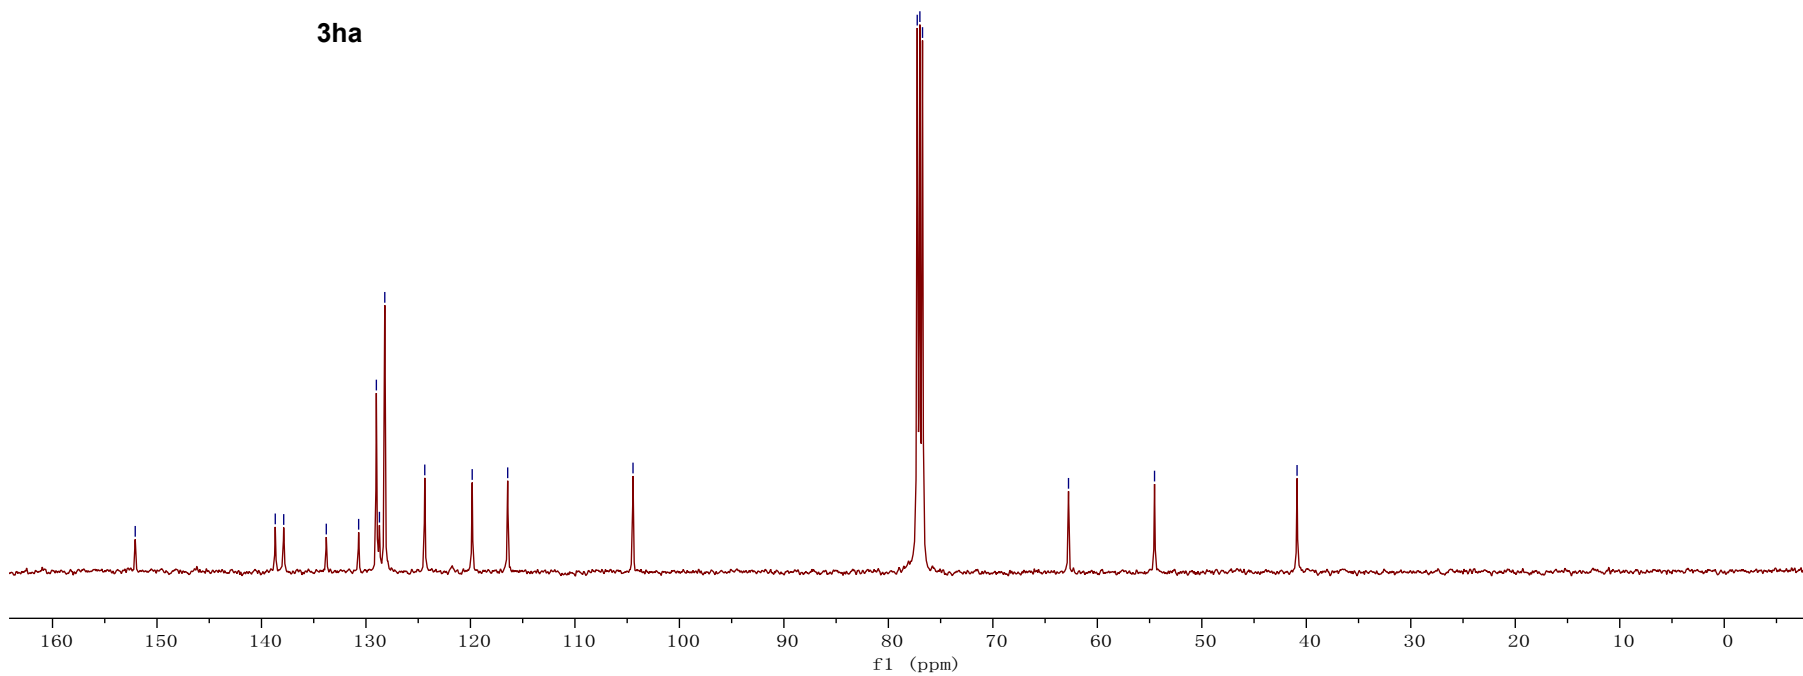

ZMH-A-3HAL/1  
ZMH-A-3HAL

1H 1D 2018 04 09

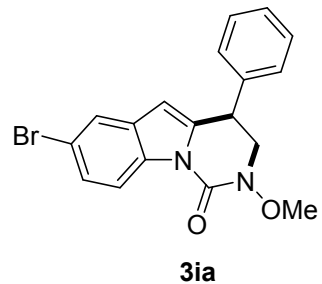

8.32  
8.30  
7.55  
7.41  
7.41  
7.40  
7.40  
7.39  
7.38  
7.36  
7.32  
7.31  
7.26  
6.00  
4.58  
4.57  
4.56  
4.55  
3.96  
3.95  
3.94  
3.92  
3.91  
3.89  
3.87  
3.84

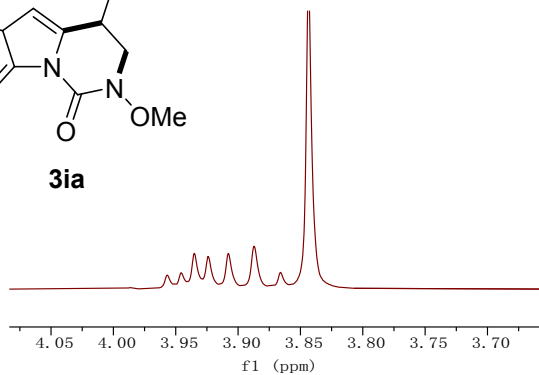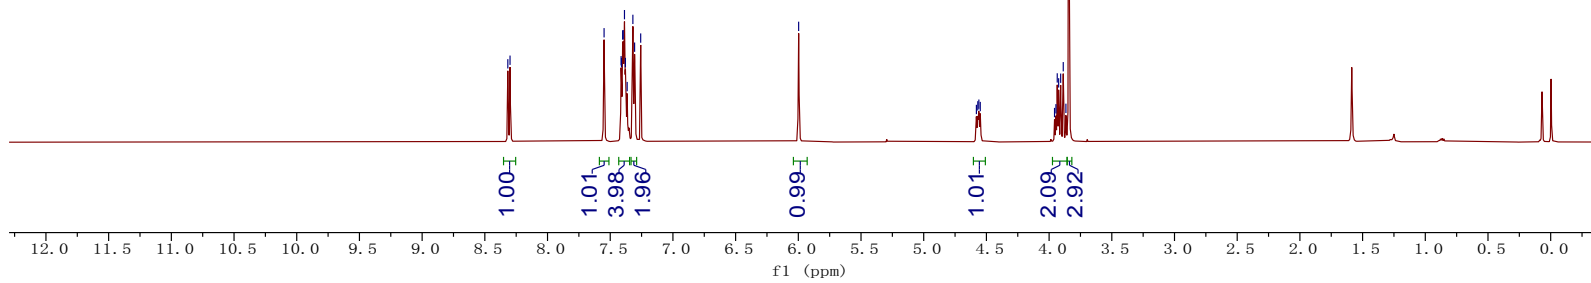

ZMH-A-3JAL/  
ZMH-A-3JAL

— 152.1

138.5  
137.9  
137.2  
131.2  
129.0  
128.2  
127.1  
122.9  
116.8  
116.4

— 104.3

77.2  
77.0  
76.7

— 62.8

— 54.5

— 40.9

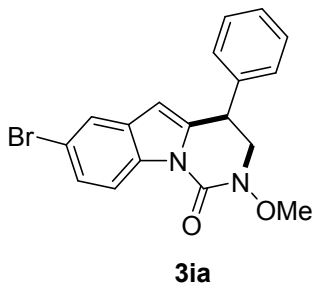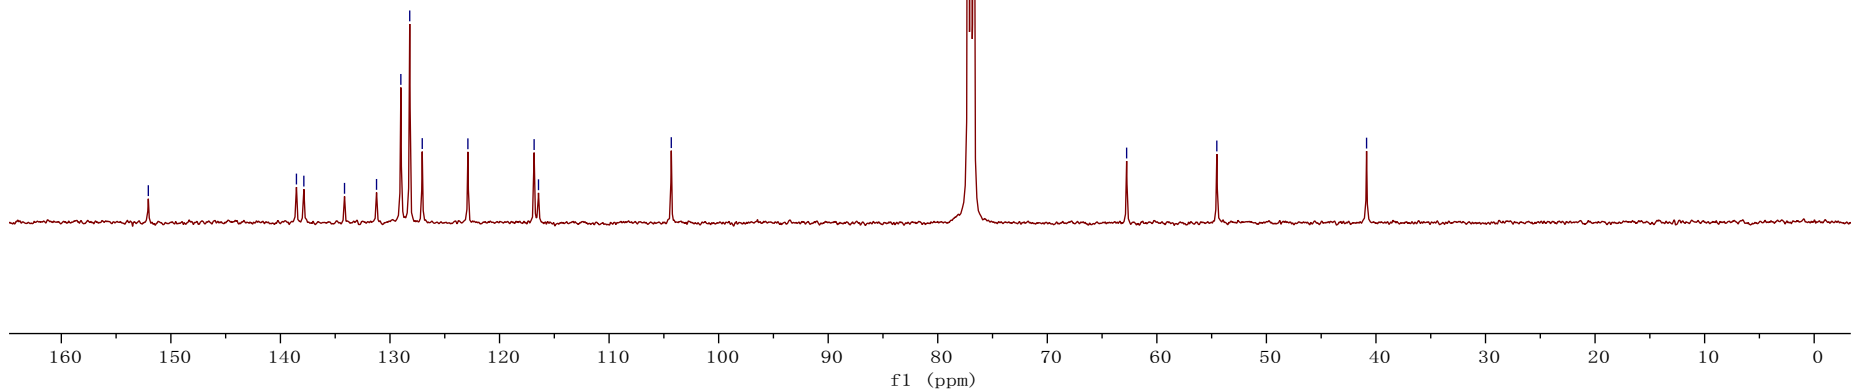

ZMH-A-3TA/1  
ZMH-A-3TA

1H 1D

2018 05

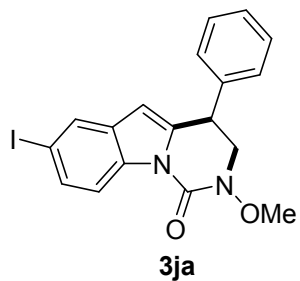

8.20  
8.19  
7.75  
7.75  
7.58  
7.57  
7.56  
7.41  
7.41  
7.40  
7.38  
7.37  
7.36  
7.35  
7.31  
7.30  
7.26  
5.97  
4.57  
4.56  
4.55  
4.54  
3.95  
3.94  
3.93  
3.92  
3.90  
3.87  
3.85  
3.84

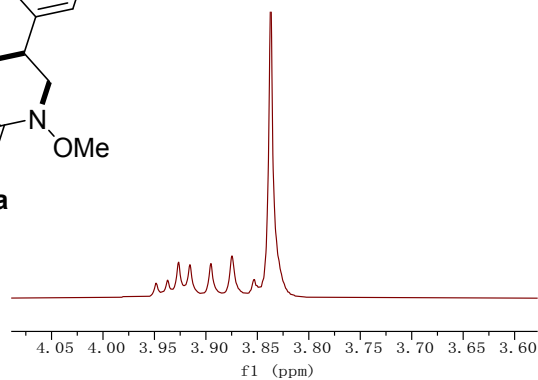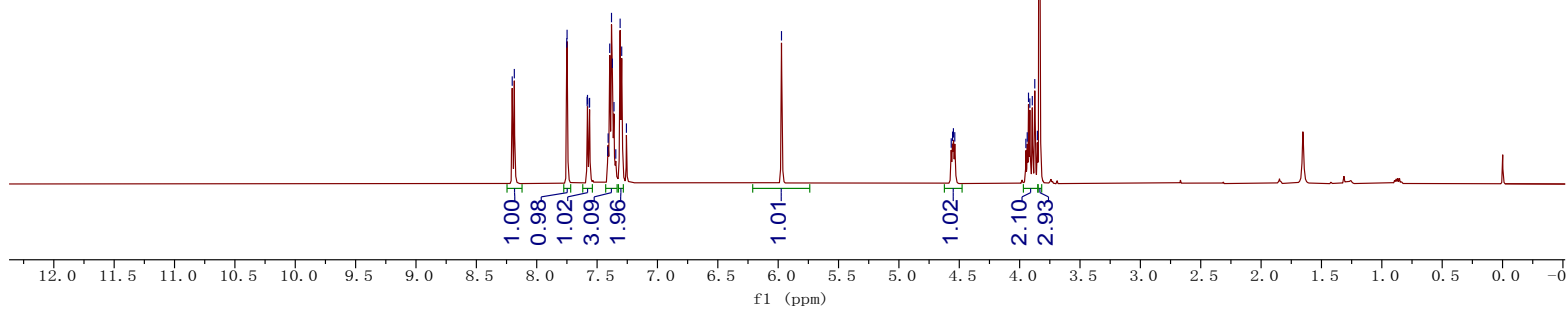

ZMH-A-3TA/2  
ZMH-A-3TA

— 152.0  
— 138.2  
— 137.9  
— 134.7  
— 132.7  
— 131.8  
— 129.0  
— 128.2  
— 117.3  
— 104.1  
— 87.2  
— 77.3  
— 77.0  
— 76.7  
— 62.7  
— 54.5  
— 40.8

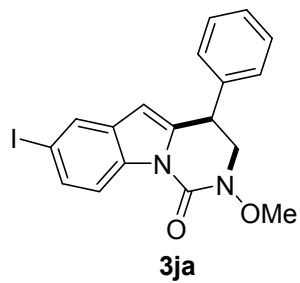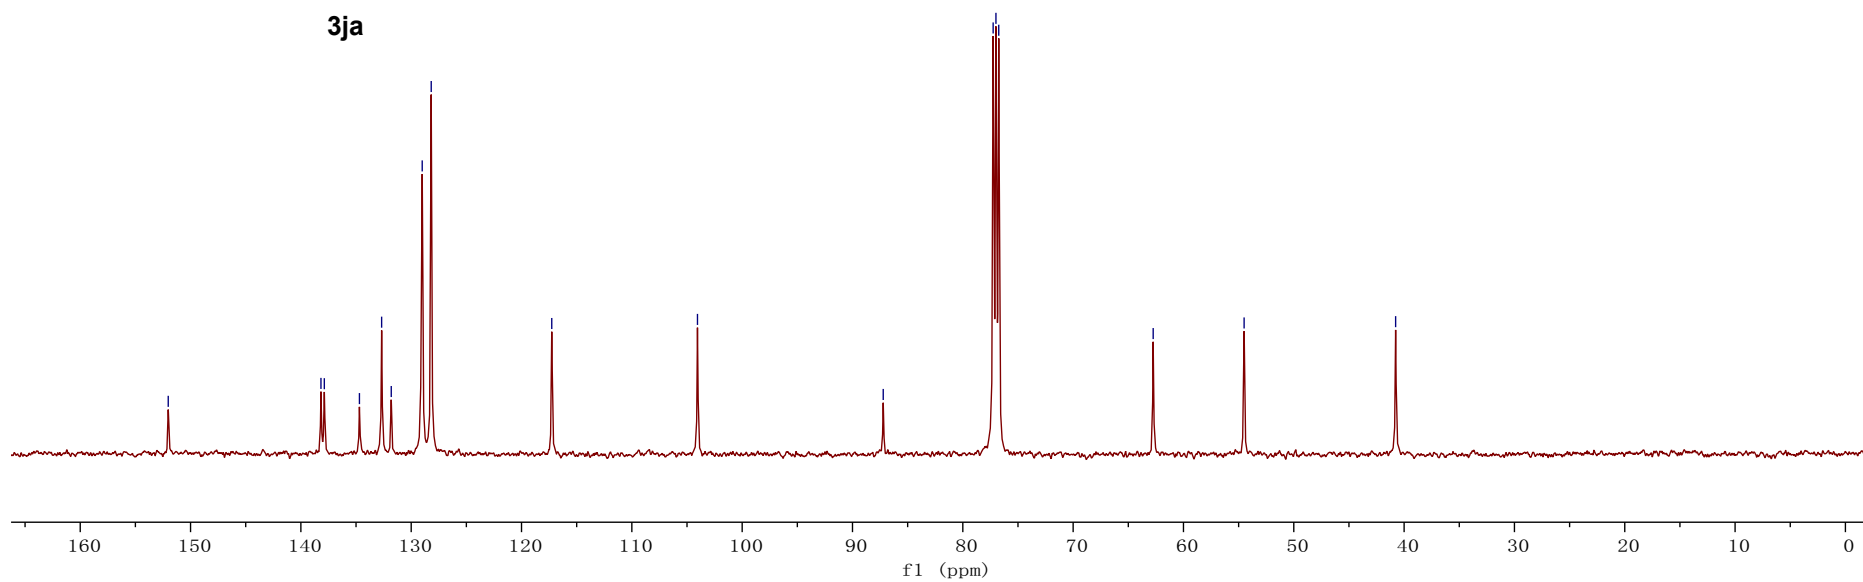

ZMH-A-3GA/1  
ZMH-A-3GA

1H 1D 2018 03 30

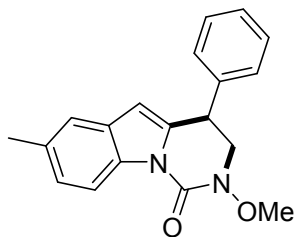

3ka

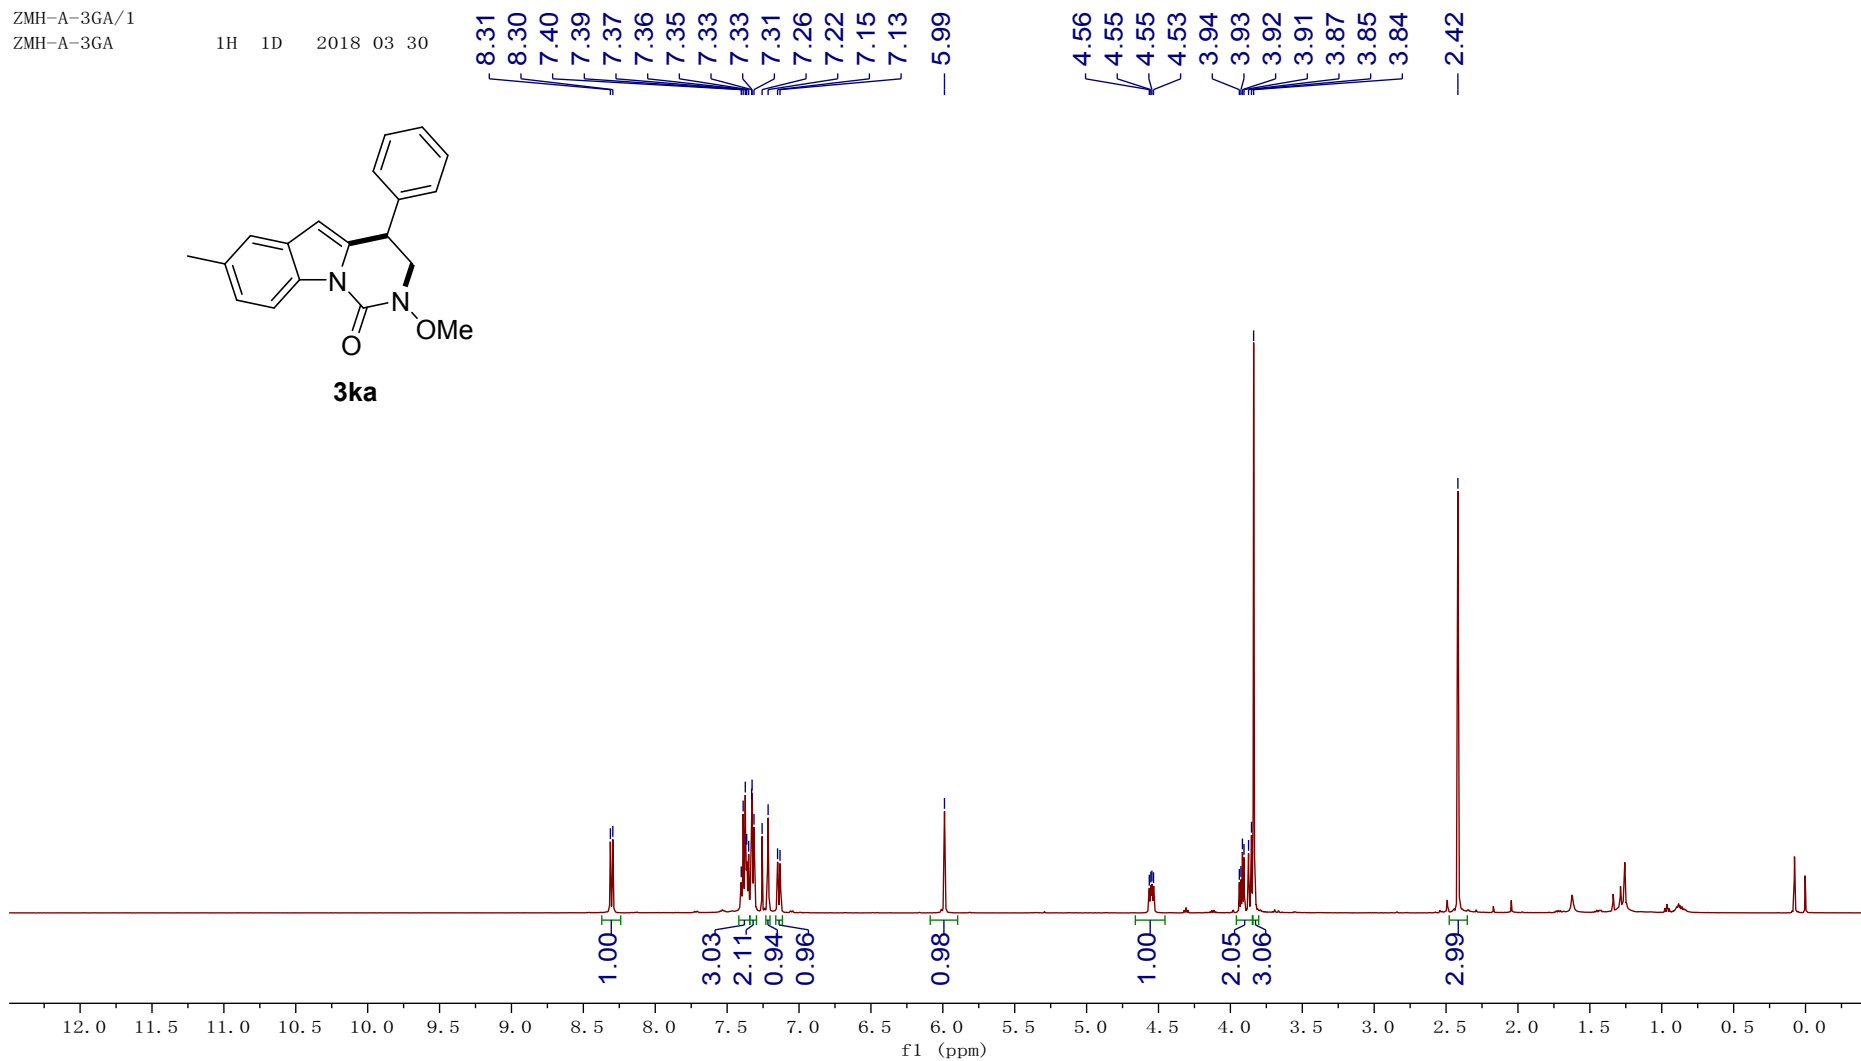



ZMH-A-3GA/  
ZMH-A-3GA

— 152.8

138.4  
137.2  
133.6  
132.6  
129.7  
128.9  
128.2  
128.0  
125.6  
120.2  
115.1

— 104.9

77.3  
77.0  
76.7

— 62.7

— 54.7

— 40.9

— 21.4

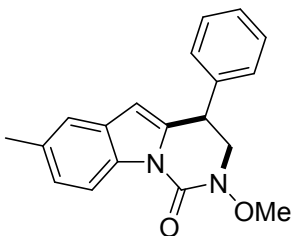

**3ka**

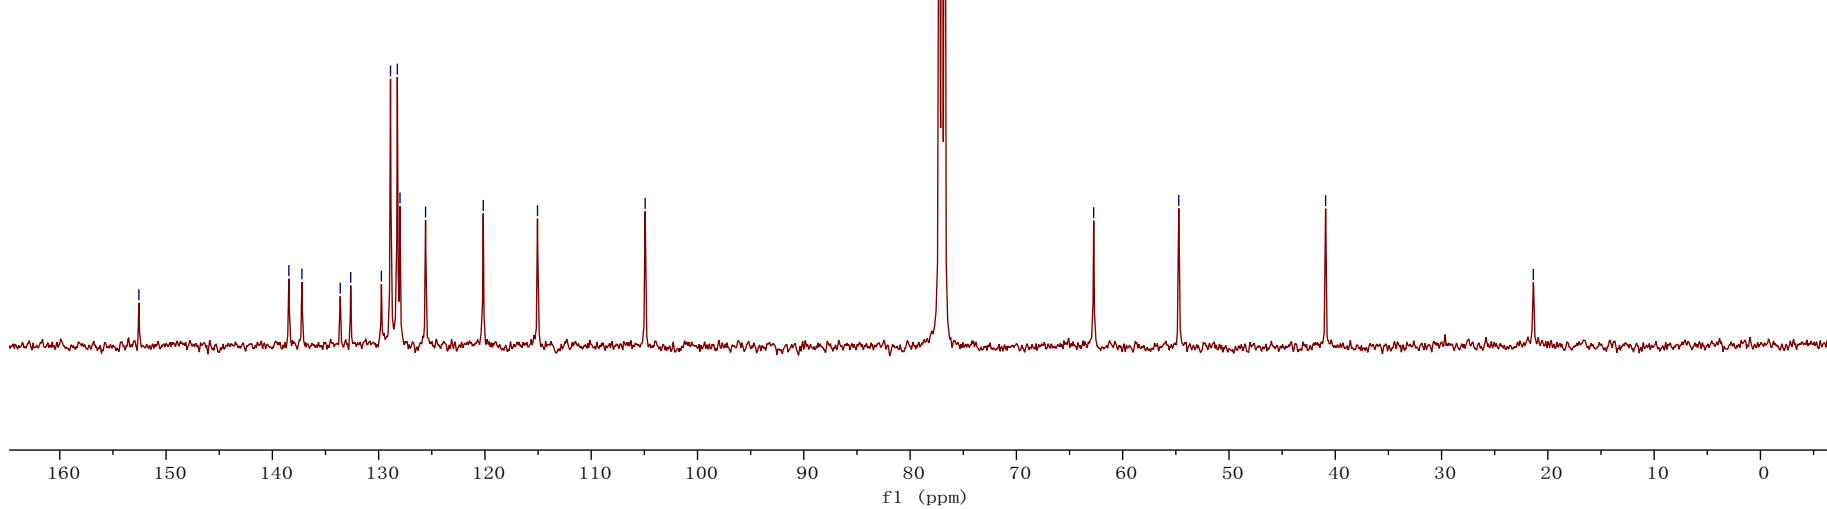

ZMH-A-3JAL/1  
ZMH-A-3JAL

1H 1D 2018

8.33  
8.31  
7.40  
7.39  
7.38  
7.37  
7.35  
7.33  
7.32  
7.26  
6.94  
6.94  
6.93  
6.92  
6.90  
6.89  
5.99  
4.56  
4.55  
4.54  
4.53  
3.94  
3.92  
3.91  
3.90  
3.88  
3.86  
3.84  
3.82

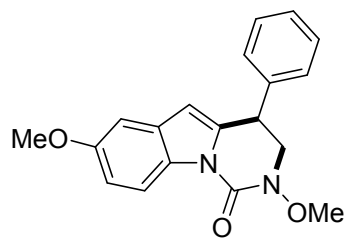

3la

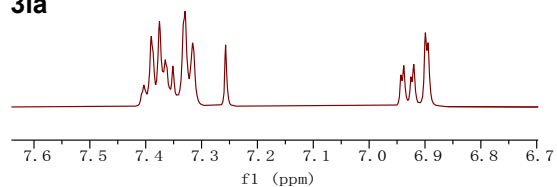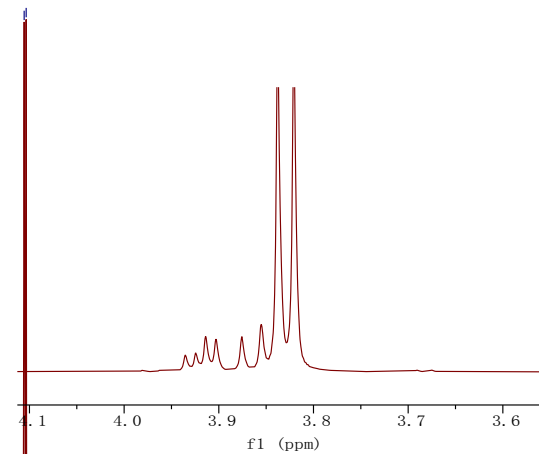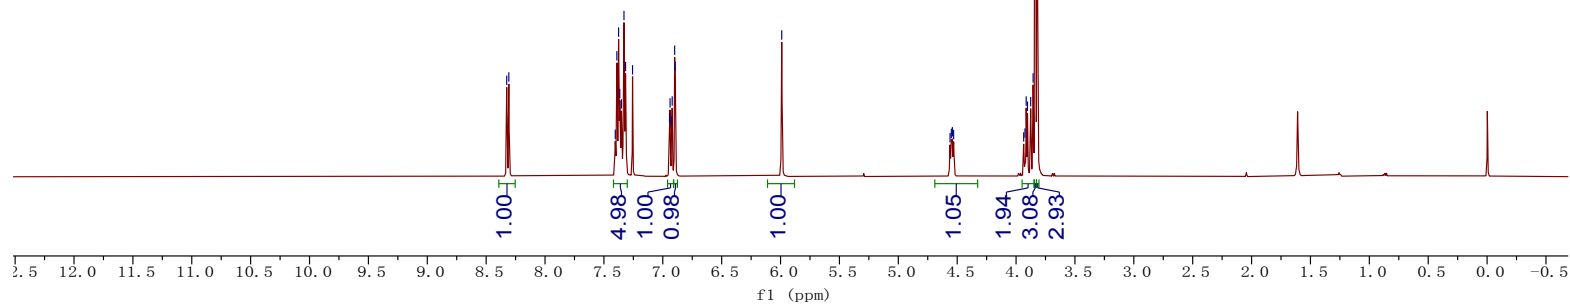

ZMH-A-3HAL  
ZMH-A-3HAL

— 156.2  
— 152.5

<sup>13</sup>C

{ 138.3  
{ 137.9  
{ 130.4  
{ 130.1  
{ 128.9  
{ 128.2  
{ 128.0

— 116.1  
— 112.7

— 105.0  
— 103.1

{ 77.2  
{ 77.0  
{ 76.7

— 62.7

{ 55.6  
{ 54.8

— 40.9

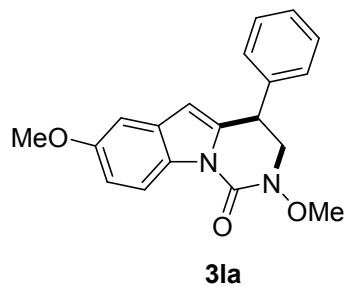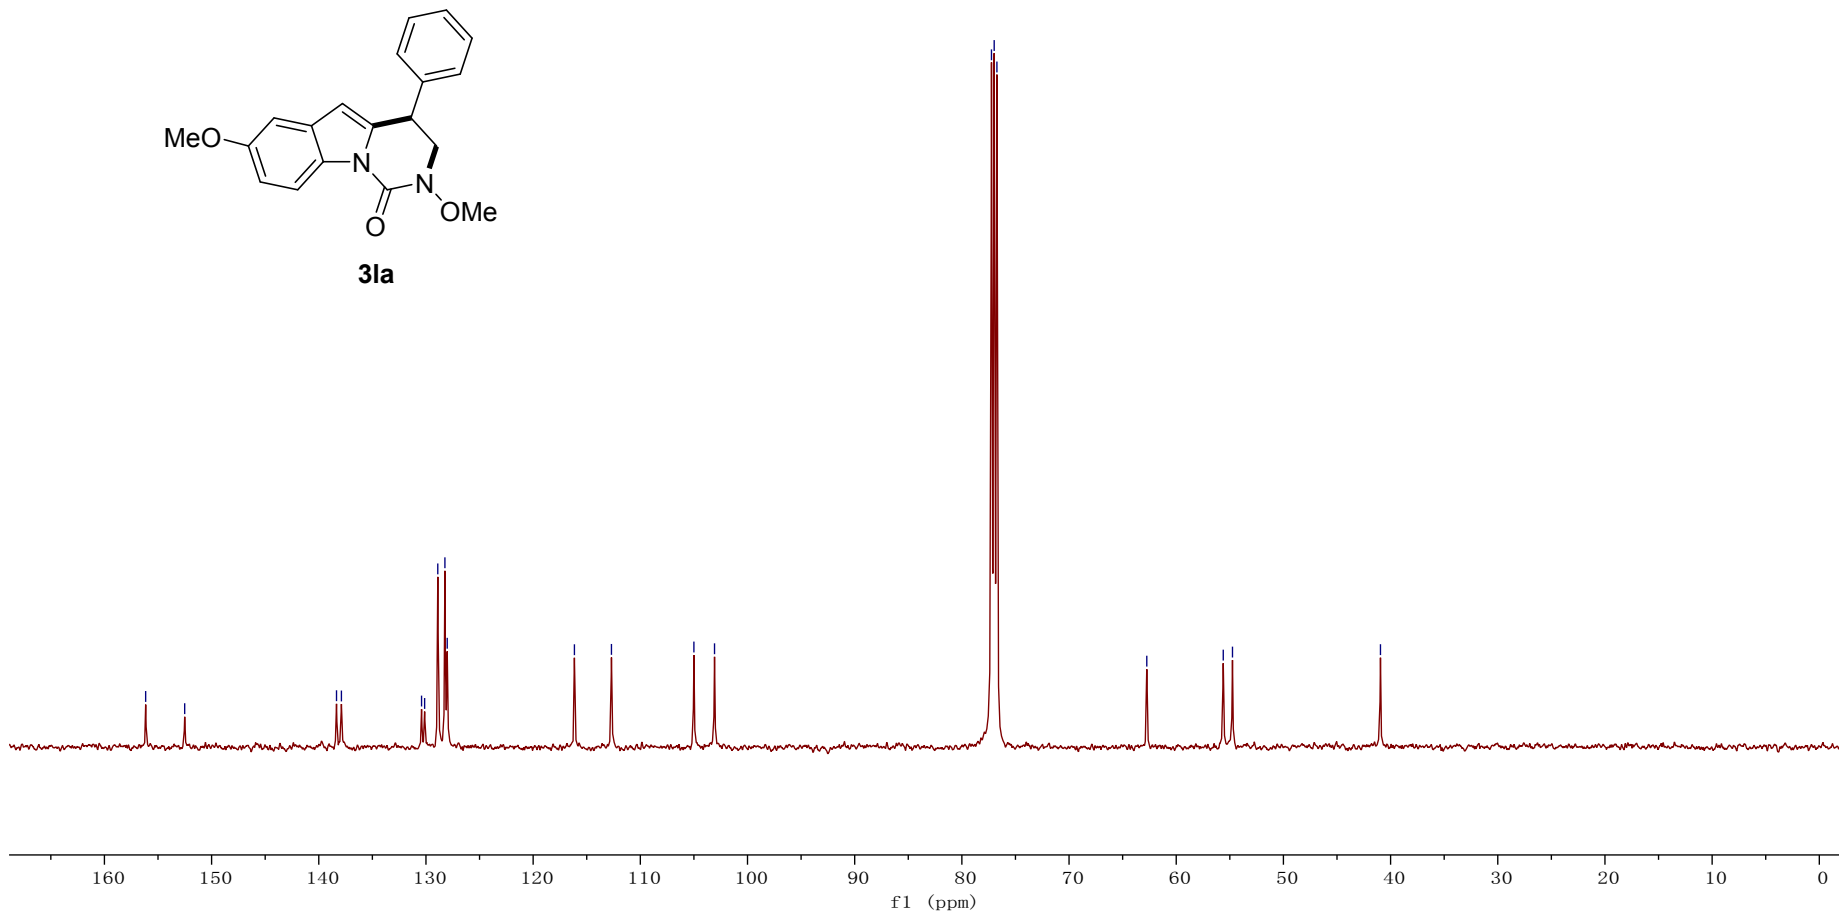

ZMH-A-3MA/1  
ZMH-A-3MA

1H 1D 2018 05 11

8.48  
8.46  
8.16  
8.02  
8.02  
8.00  
8.00  
7.42  
7.41  
7.39  
7.38  
7.37  
7.34  
7.33  
7.32  
7.26  
6.13

4.60  
4.59  
4.58  
4.57  
3.97  
3.96  
3.95  
3.94  
3.93  
3.92  
3.91  
3.89  
3.85

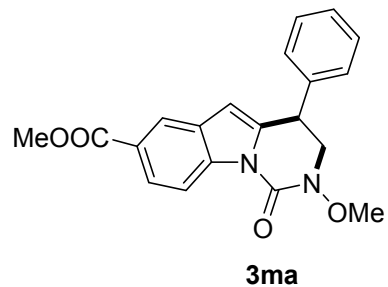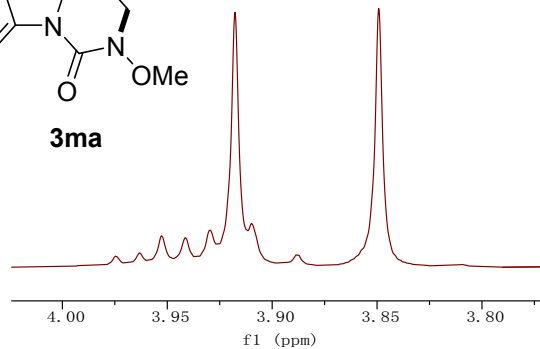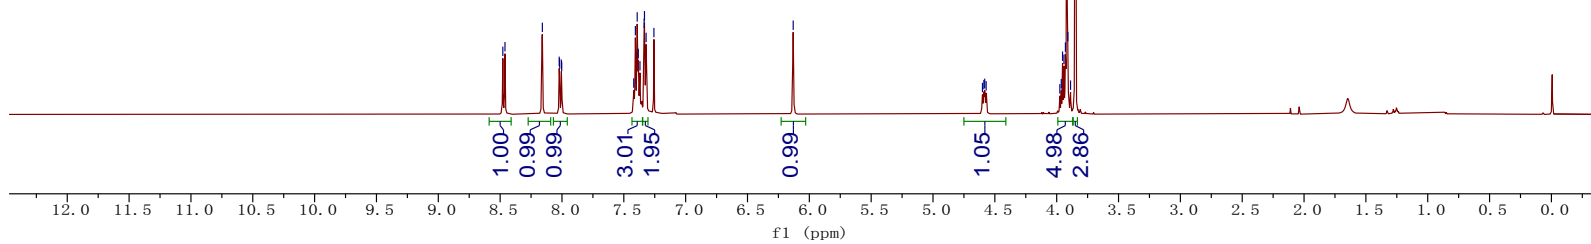

ZMH-A-3MA/2  
ZMH-A-3MA

— 167.4

13C 1D 20180505

— 151.9

— 138.7

— 138.1

— 137.8

— 129.3

— 129.0

— 128.2

— 125.6

— 125.0

— 122.5

— 115.1

— 105.5

— 77.2

— 77.0

— 76.7

— 62.7

— 54.4

— 52.0

— 40.9

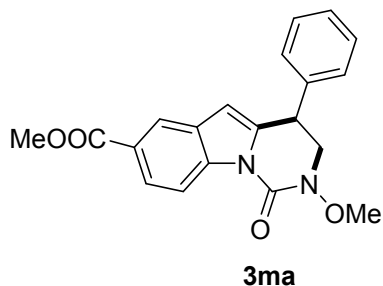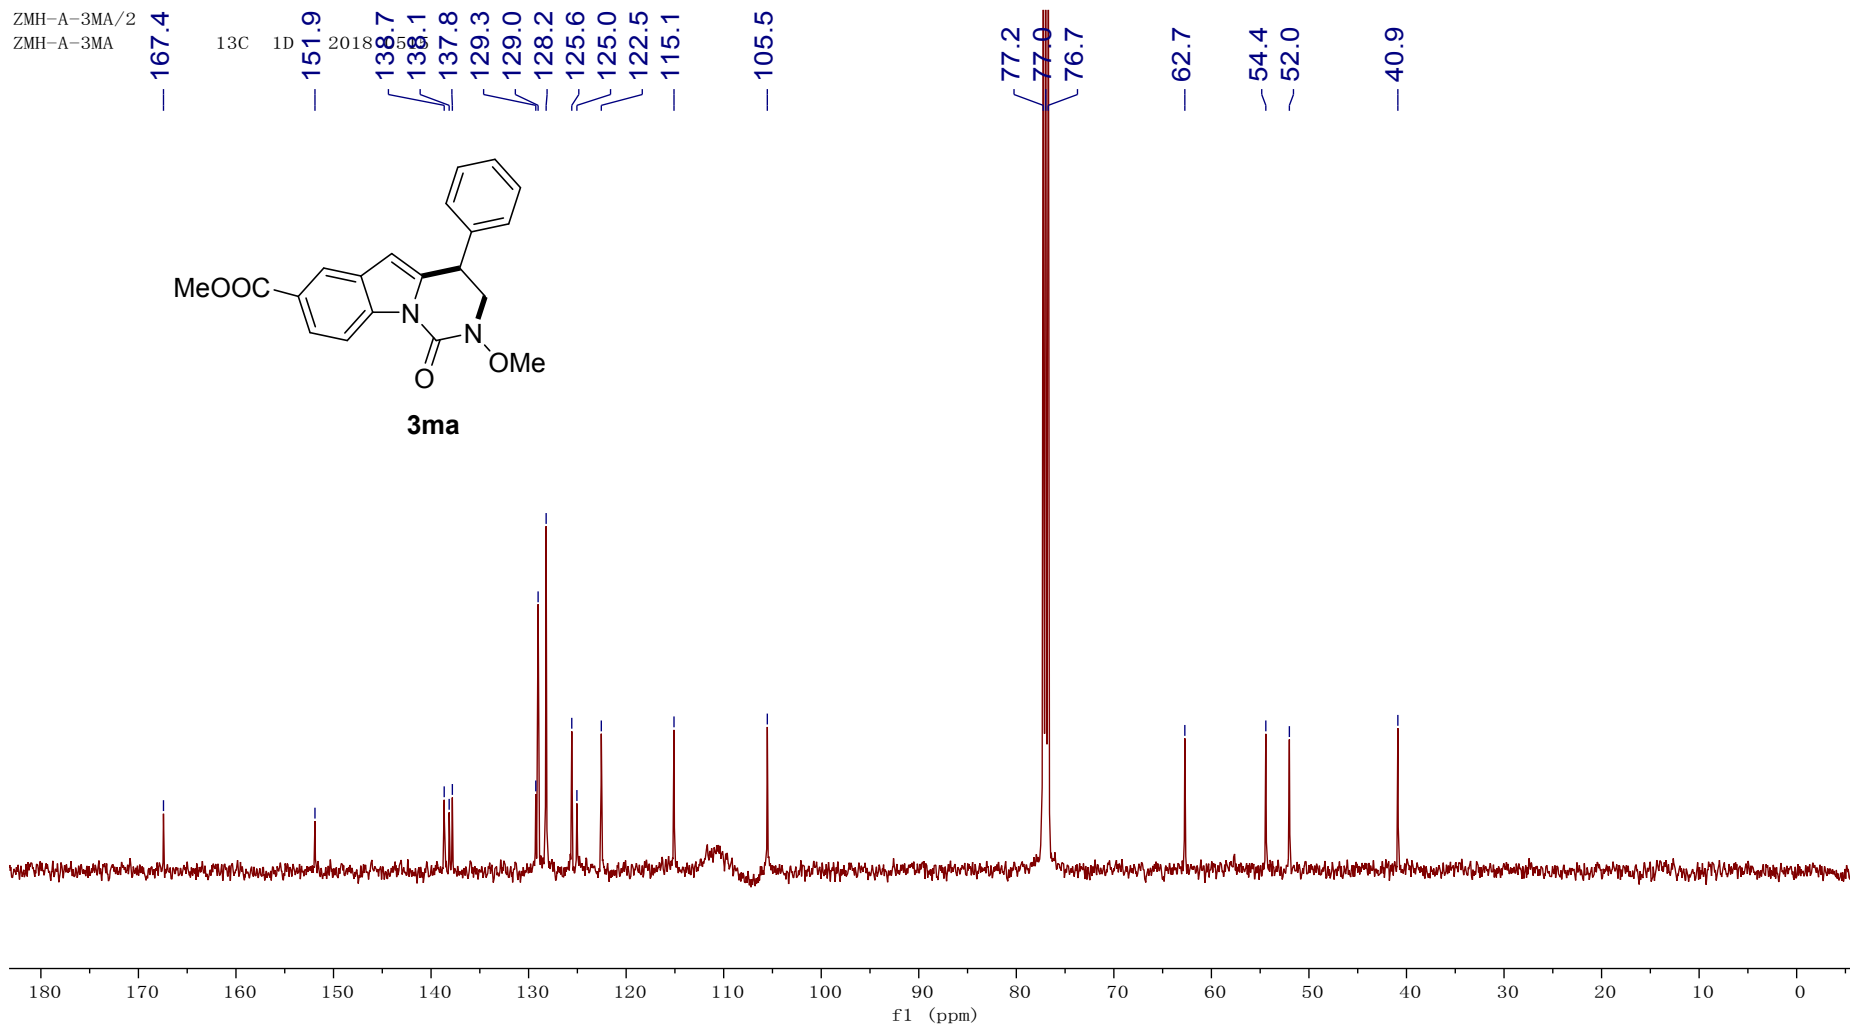

ZMH-A-3LA/1  
ZMH-A-3LA

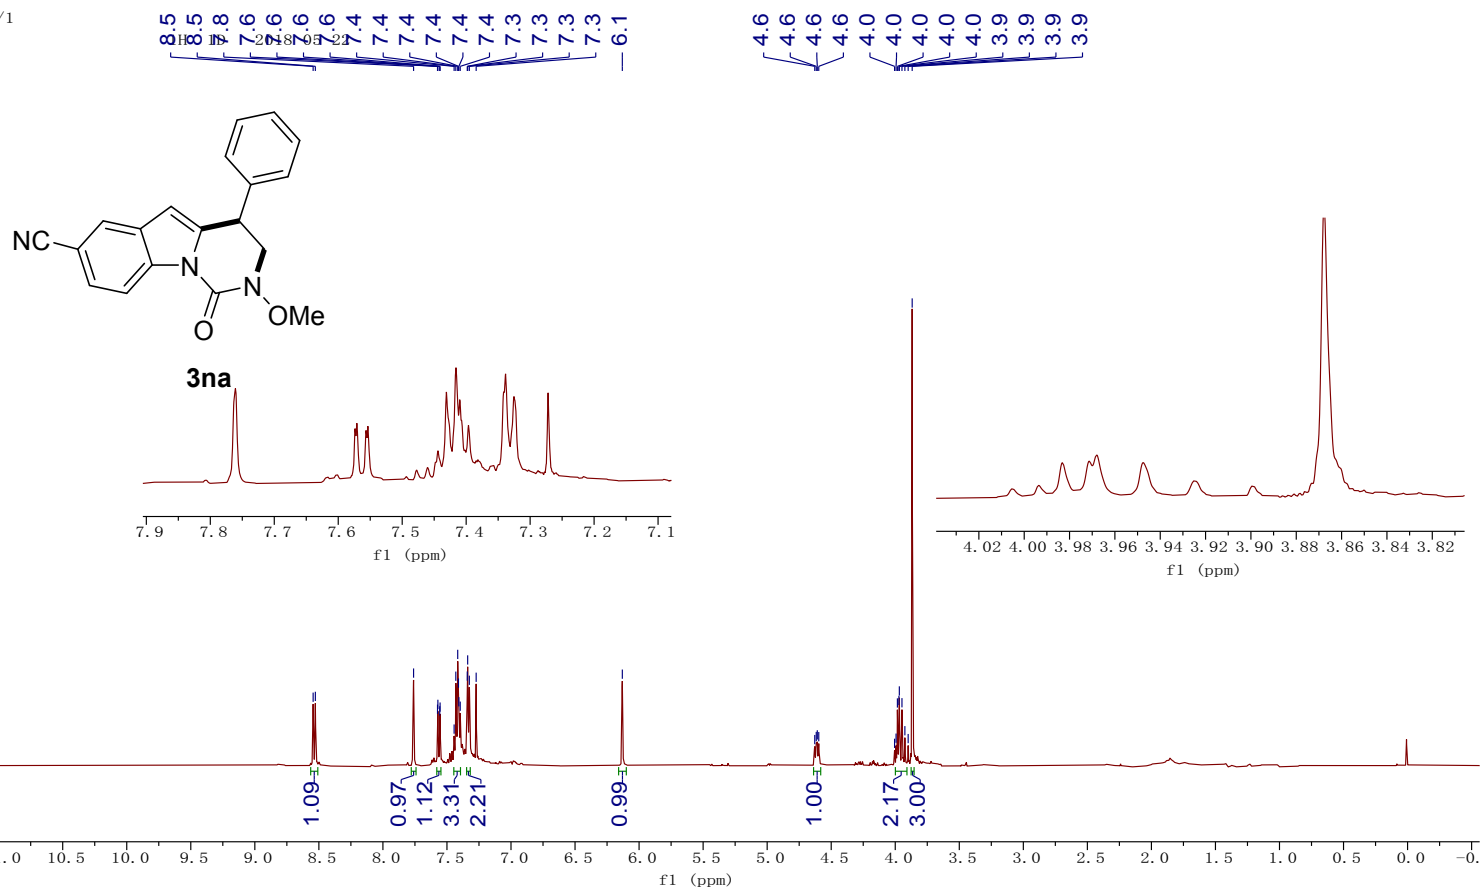

ZMH-A-3LA/2  
ZMH-A-3LA

13C 1D 201 1599  
— 157.5  
— 139.8  
— 137.3  
— 129.5  
— 129.1  
— 128.4  
— 128.2  
— 127.3  
— 125.1  
— 119.7  
— 116.3  
— 106.4  
— 104.7

{ 77.3  
— 77.0  
— 76.7

— 62.8

— 54.2

— 40.8

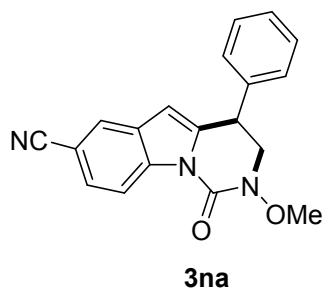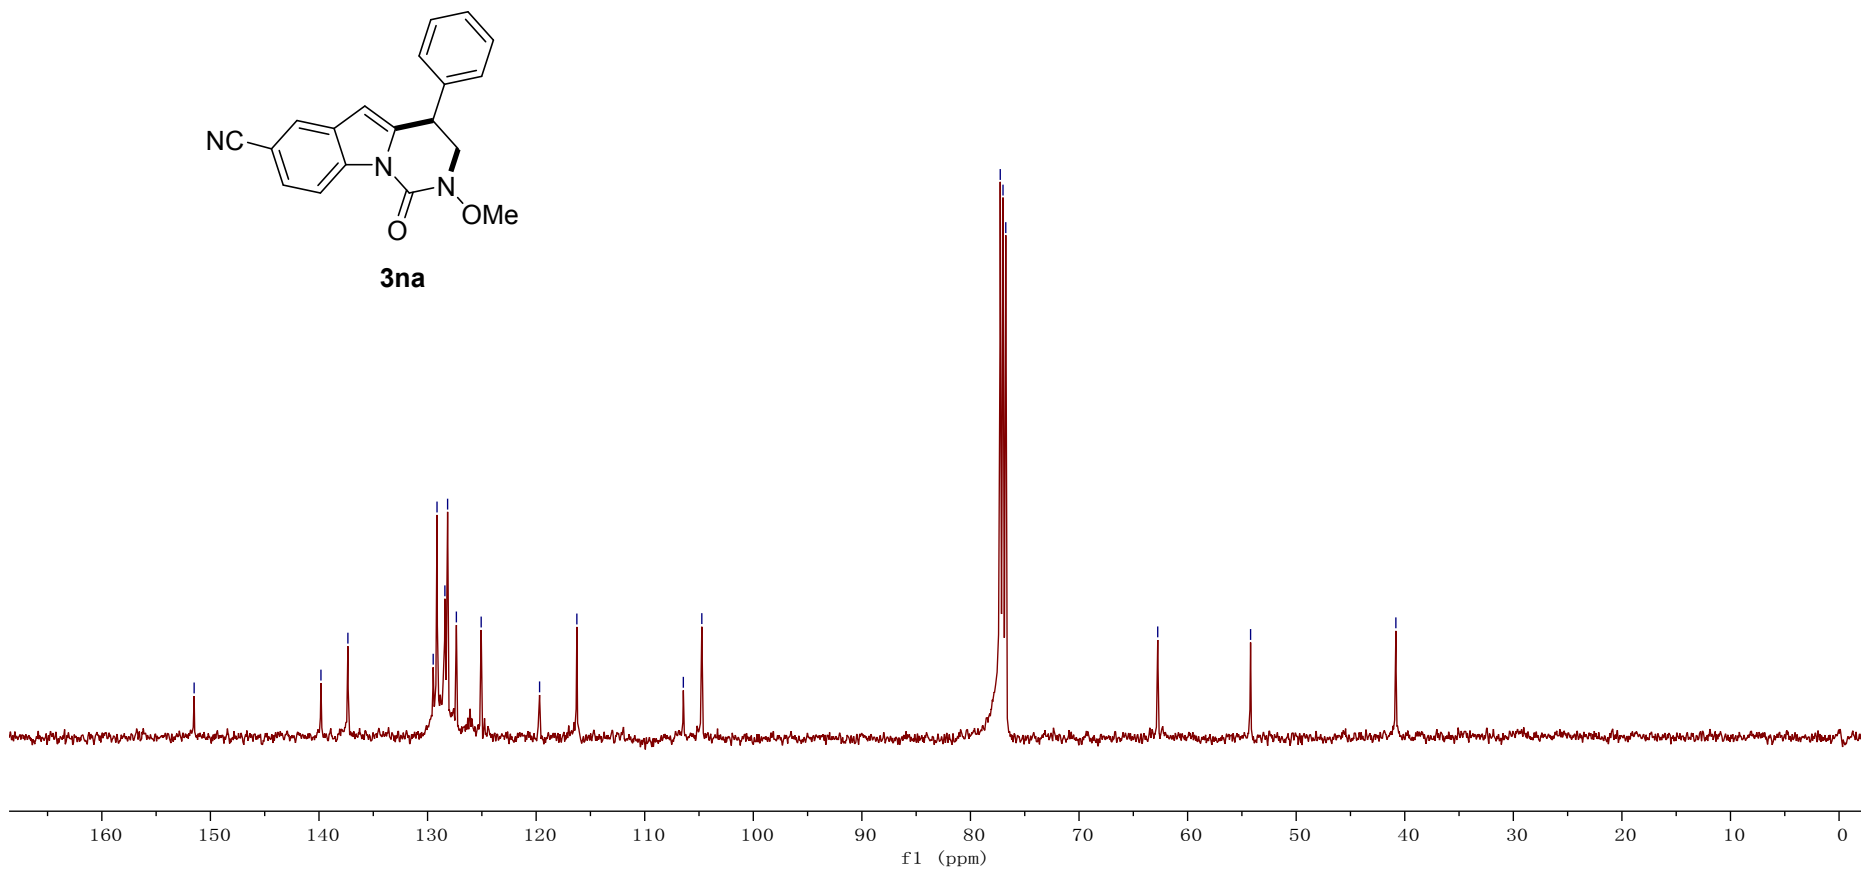

ZMH-A-3CAL. 1.fid  
ZMH-A-3CAL

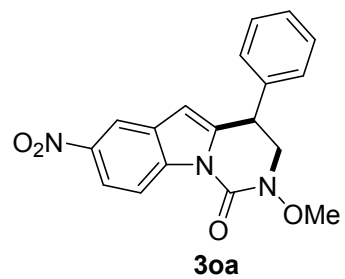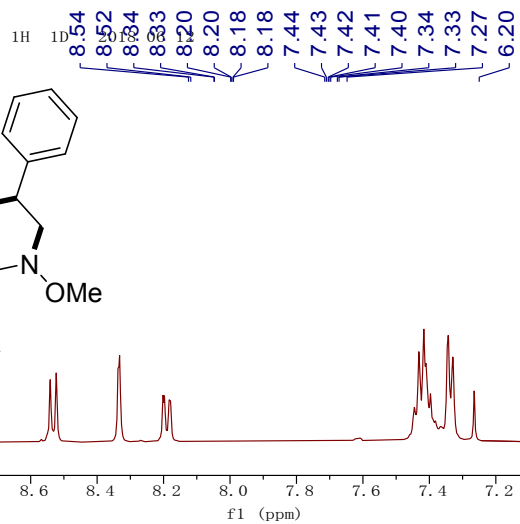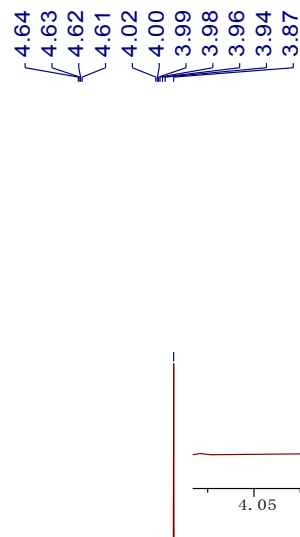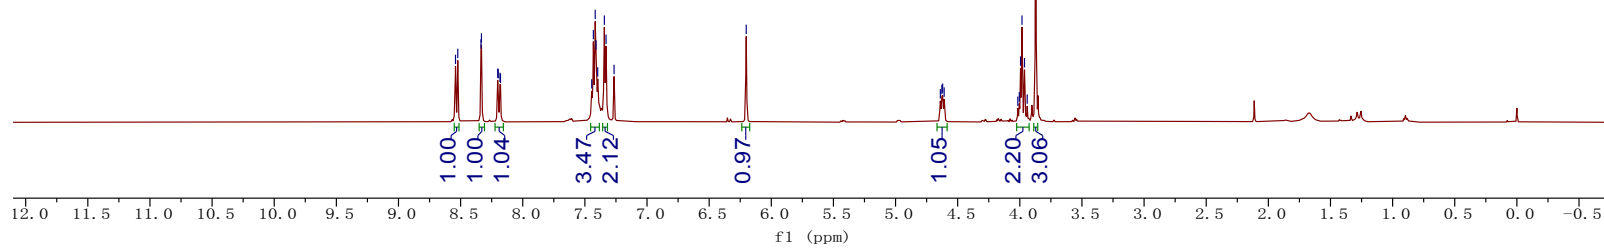



ZMH-A-3CAL. 2. fid  
ZMH-A-3CAL

13C 1D

— 151.3  
— 148.8  
— 149.6  
— 138.6  
— 137.2  
— 129.3  
— 129.2  
— 128.5  
— 128.2  
— 119.5  
— 116.5  
— 115.6  
— 105.6

{ 77.2  
— 77.0  
— 76.7  
— 62.8  
— 54.2  
— 40.9

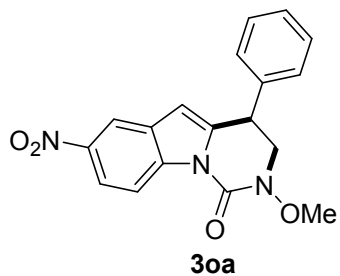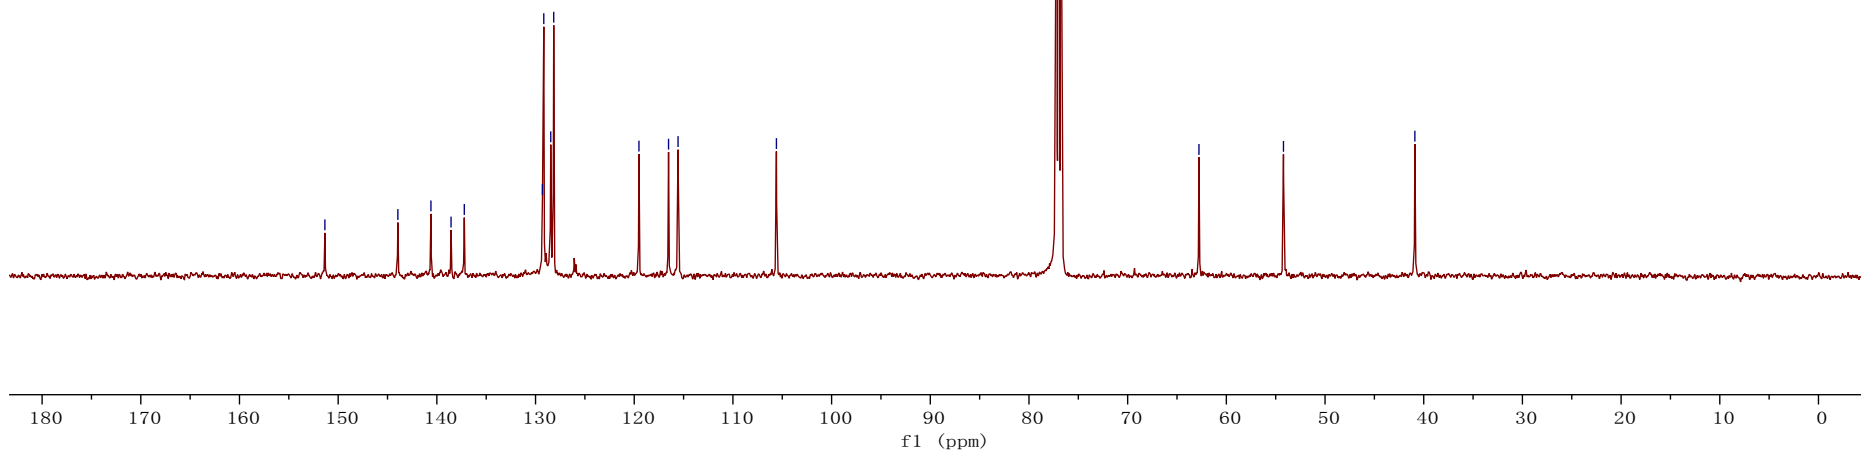

ZMH-A-3NA/1  
ZMH-A-3NA

1H 1D 2018 04 11

8.64  
7.41  
7.40  
7.38  
7.38  
7.36  
7.34  
7.34  
7.32  
7.31  
7.28  
7.26

— 6.02

4.56  
4.55  
4.54  
4.53  
3.95  
3.94  
3.93  
3.92  
3.91  
3.89  
3.87  
3.85

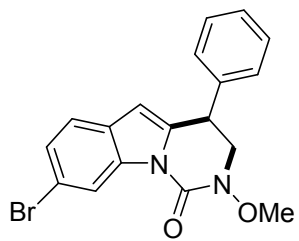

3pa

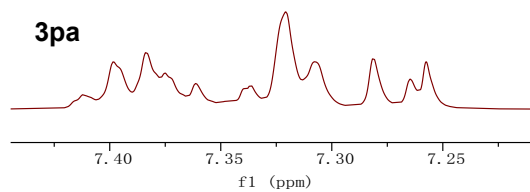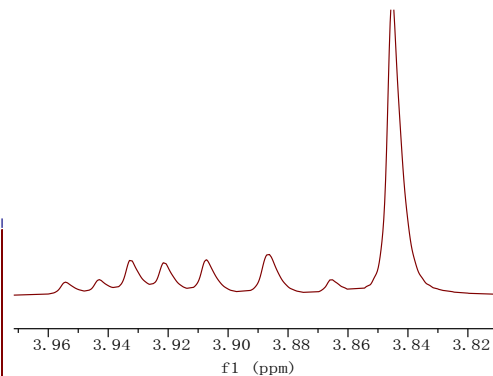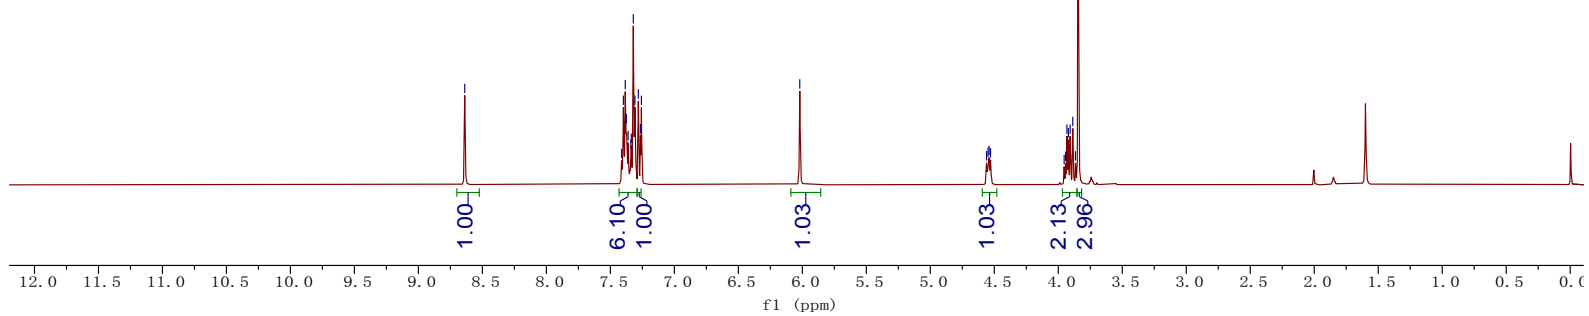

ZMH-A-3NA/2  
ZMH-A-3NA

— 151.9  
13C 1H  
~ 137.9  
~ 136.0  
129.0  
128.3  
128.2  
126.4  
121.3  
118.5  
117.8

— 104.9

77.2  
77.0  
76.7

— 62.7

— 54.5

— 40.8

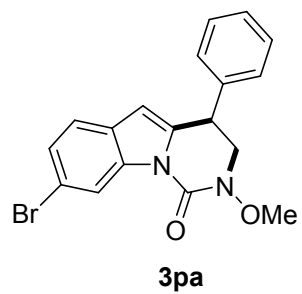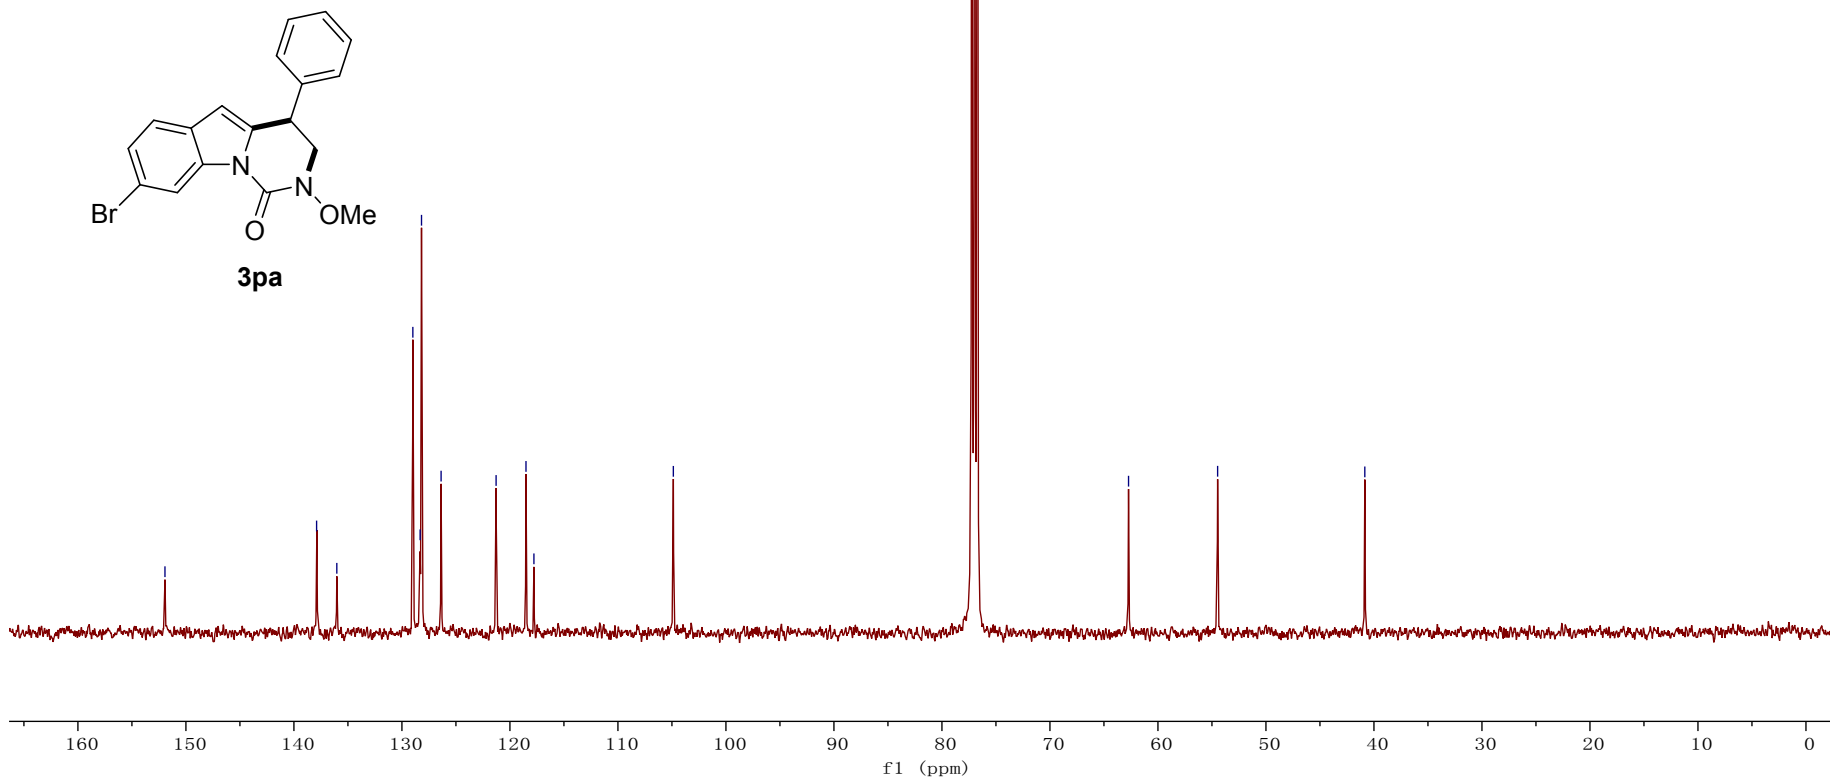

ZMH-A-30A/1  
ZMH-A-30A

1H 1D 2018 04

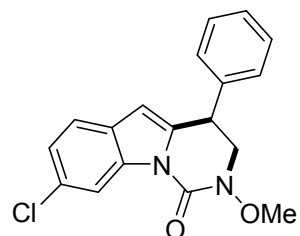

3qa

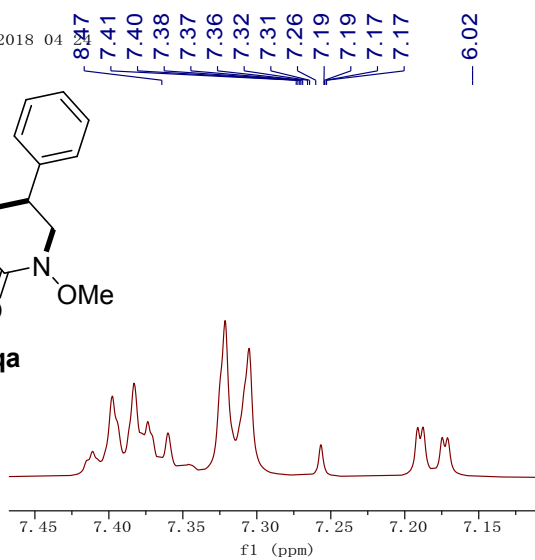

4.56  
4.55  
4.54  
4.53  
3.95  
3.94  
3.93  
3.92  
3.90  
3.88  
3.86  
3.84  
3.83  
3.83

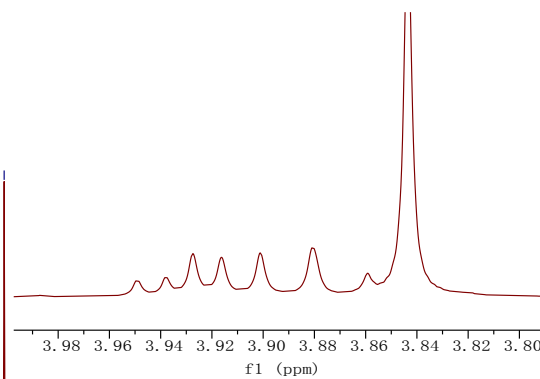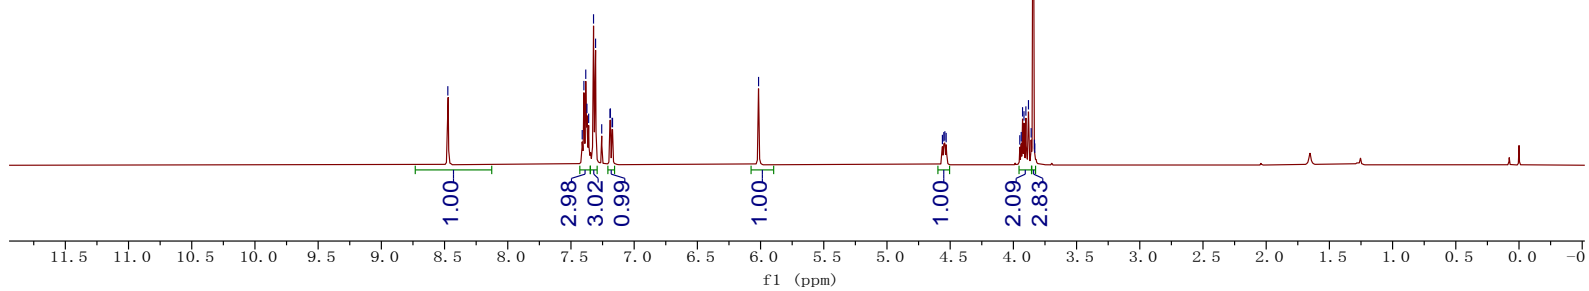

ZMH-A-30A/2  
ZMH-A-30A

— 152.0

13C

— 137.9

— 135.7

— 130.0

— 129.0

— 128.2

— 128.0

— 123.7

— 120.9

— 115.6

— 104.8

77.3

77.0

76.8

— 62.7

— 54.5

— 40.8

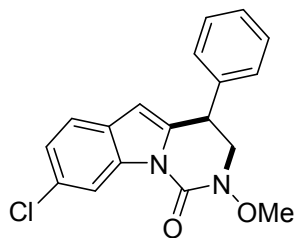

**3qa**

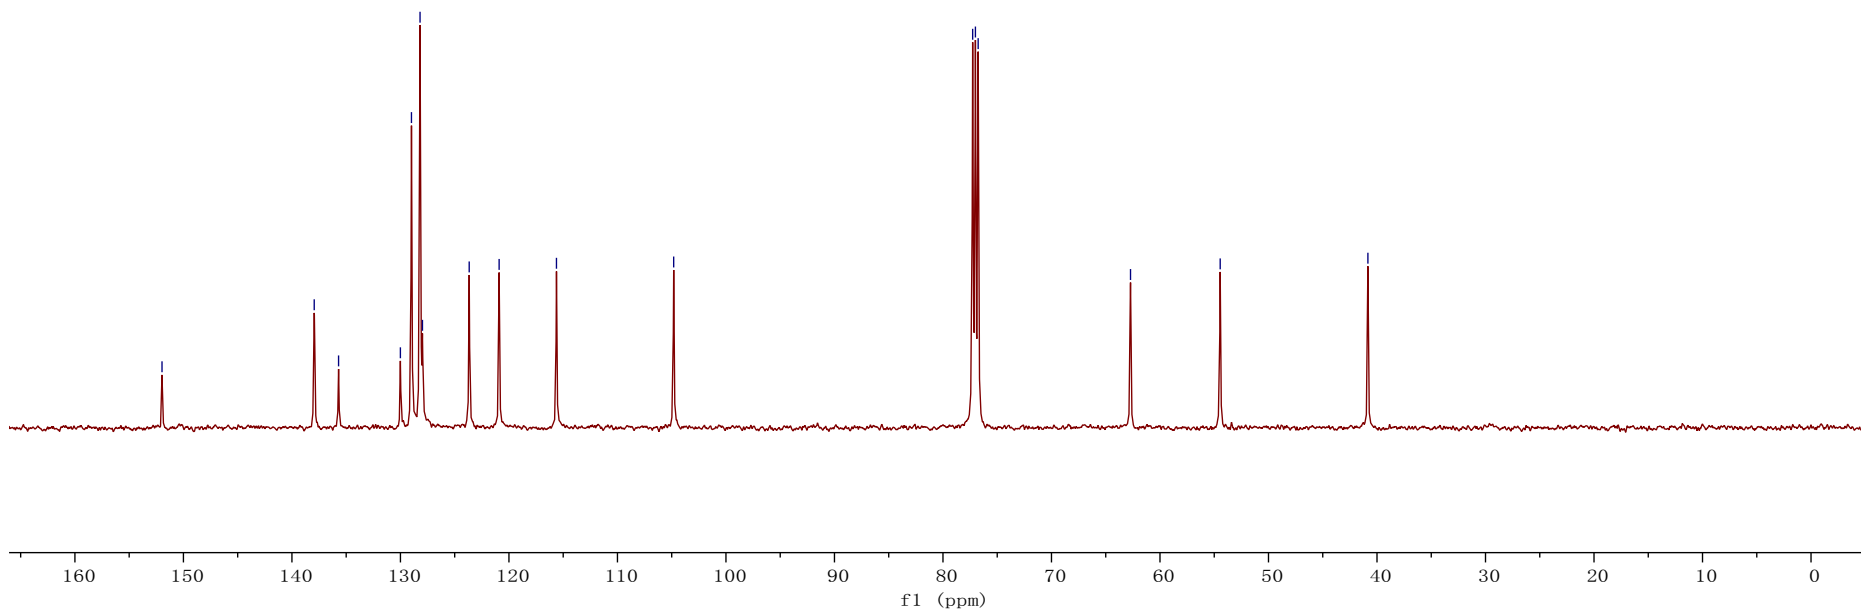

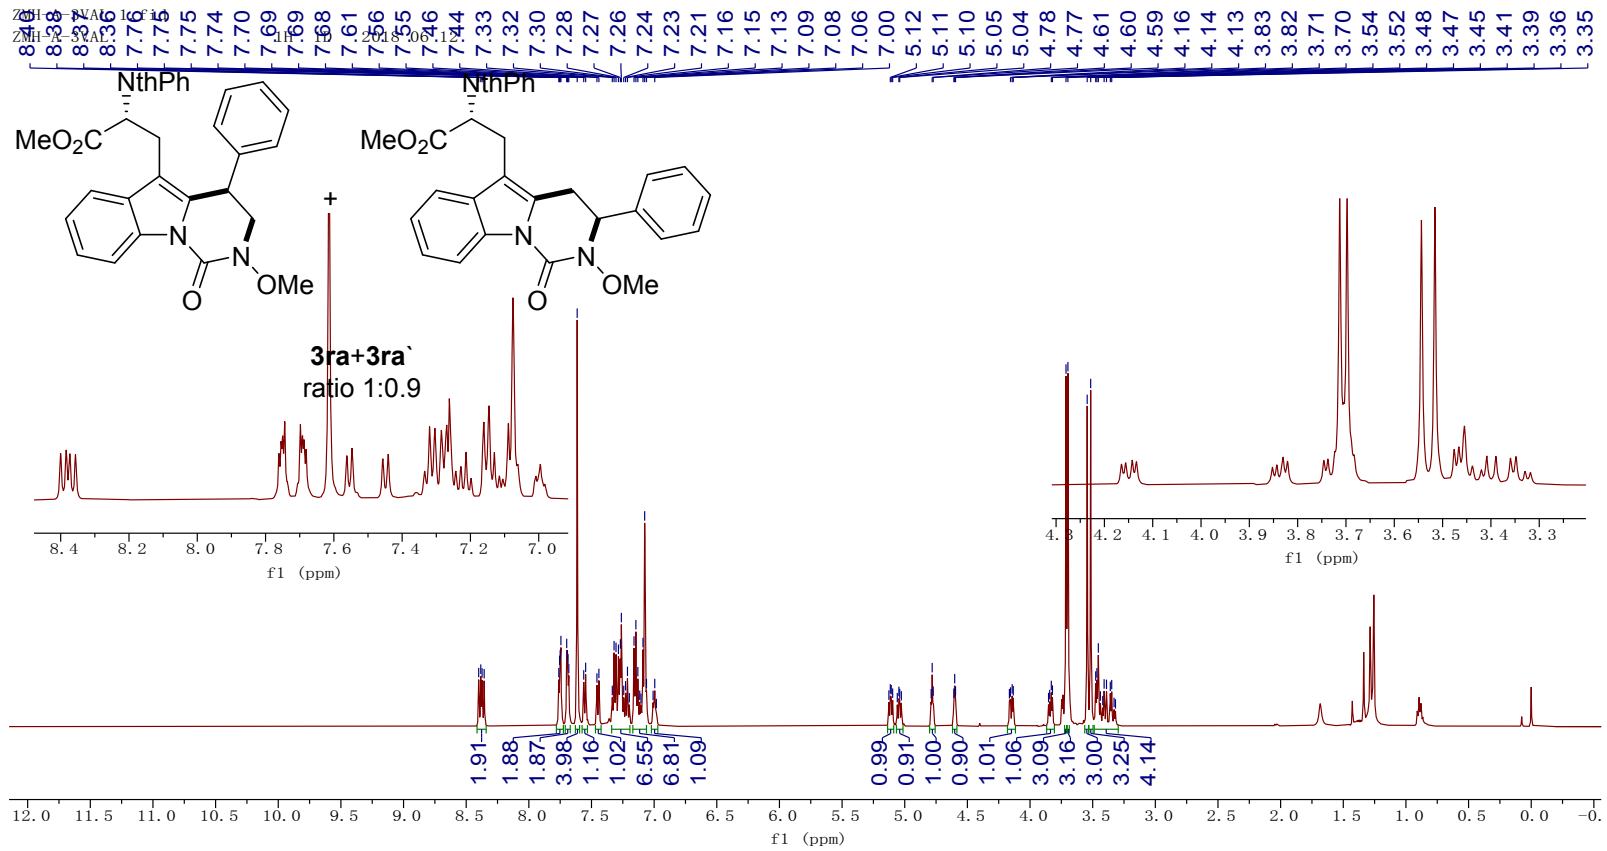

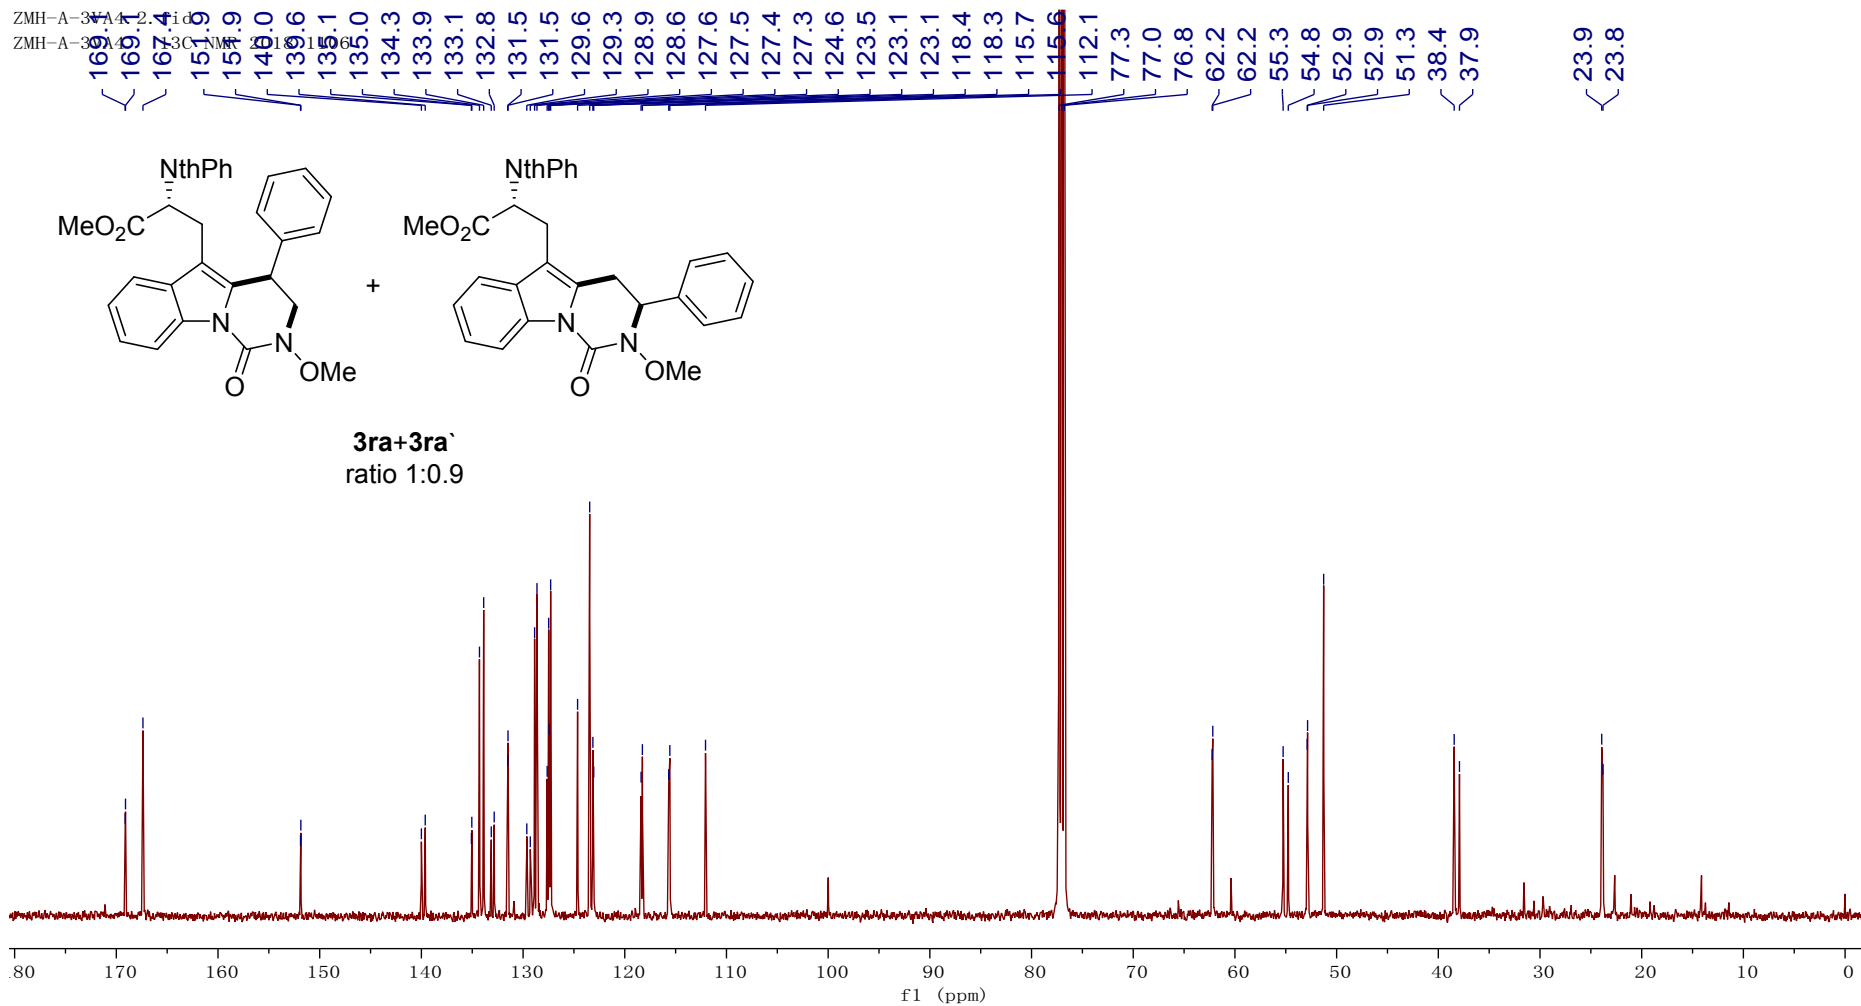

ZMH-C-3AZ. 1. fid  
ZMH-C-3AZ

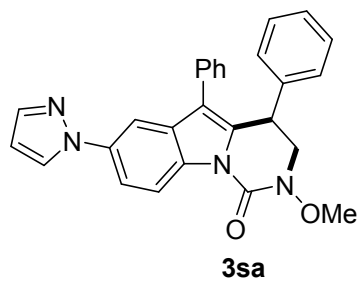

8.61  
8.60  
7.93  
7.91  
7.91  
7.72  
7.70  
7.69  
7.34  
7.33  
7.31  
7.30  
7.30  
7.29  
7.28  
7.26  
7.23  
7.22  
7.14  
7.13  
6.46

4.60  
4.25  
4.24  
4.23  
4.22  
3.81  
3.80  
3.79  
3.78  
3.56

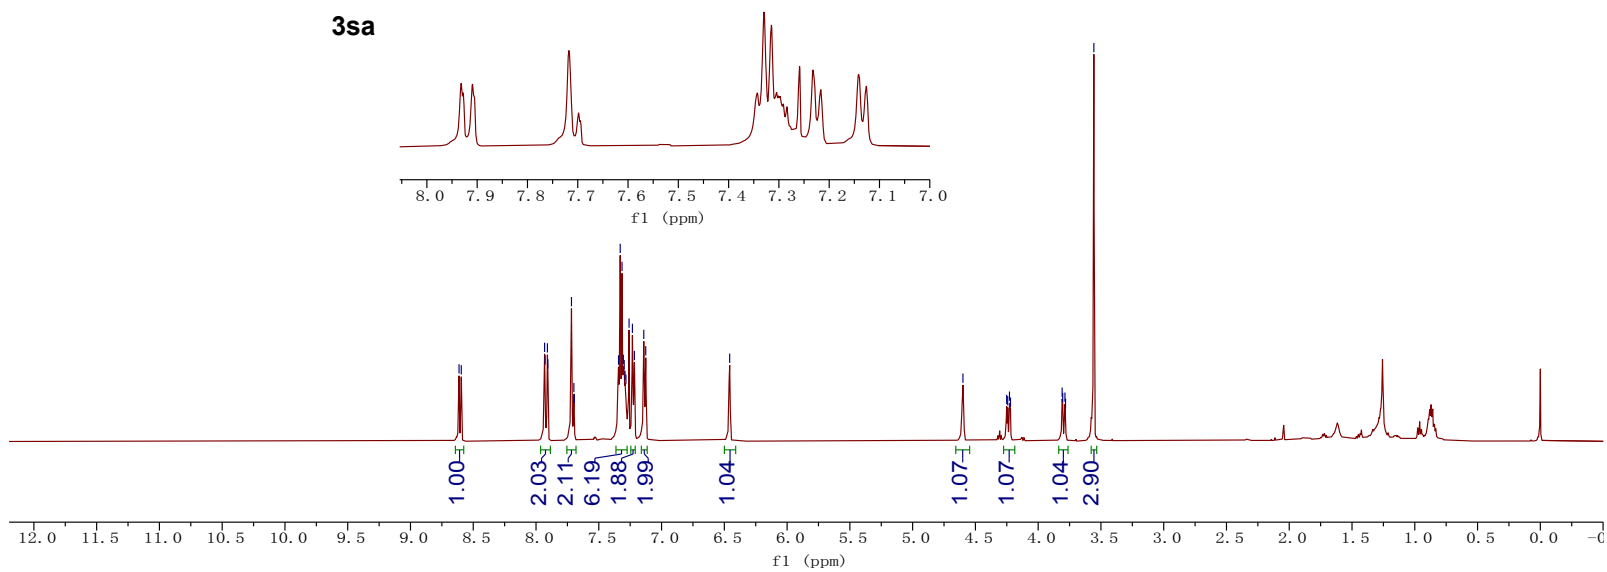



ZMH-C-3Aa-1123.f1  
ZMH-C-3Aa-1123.D

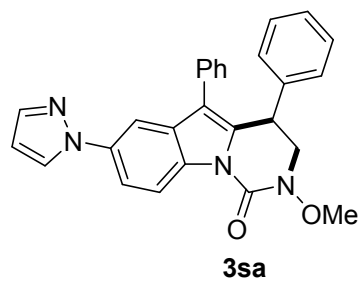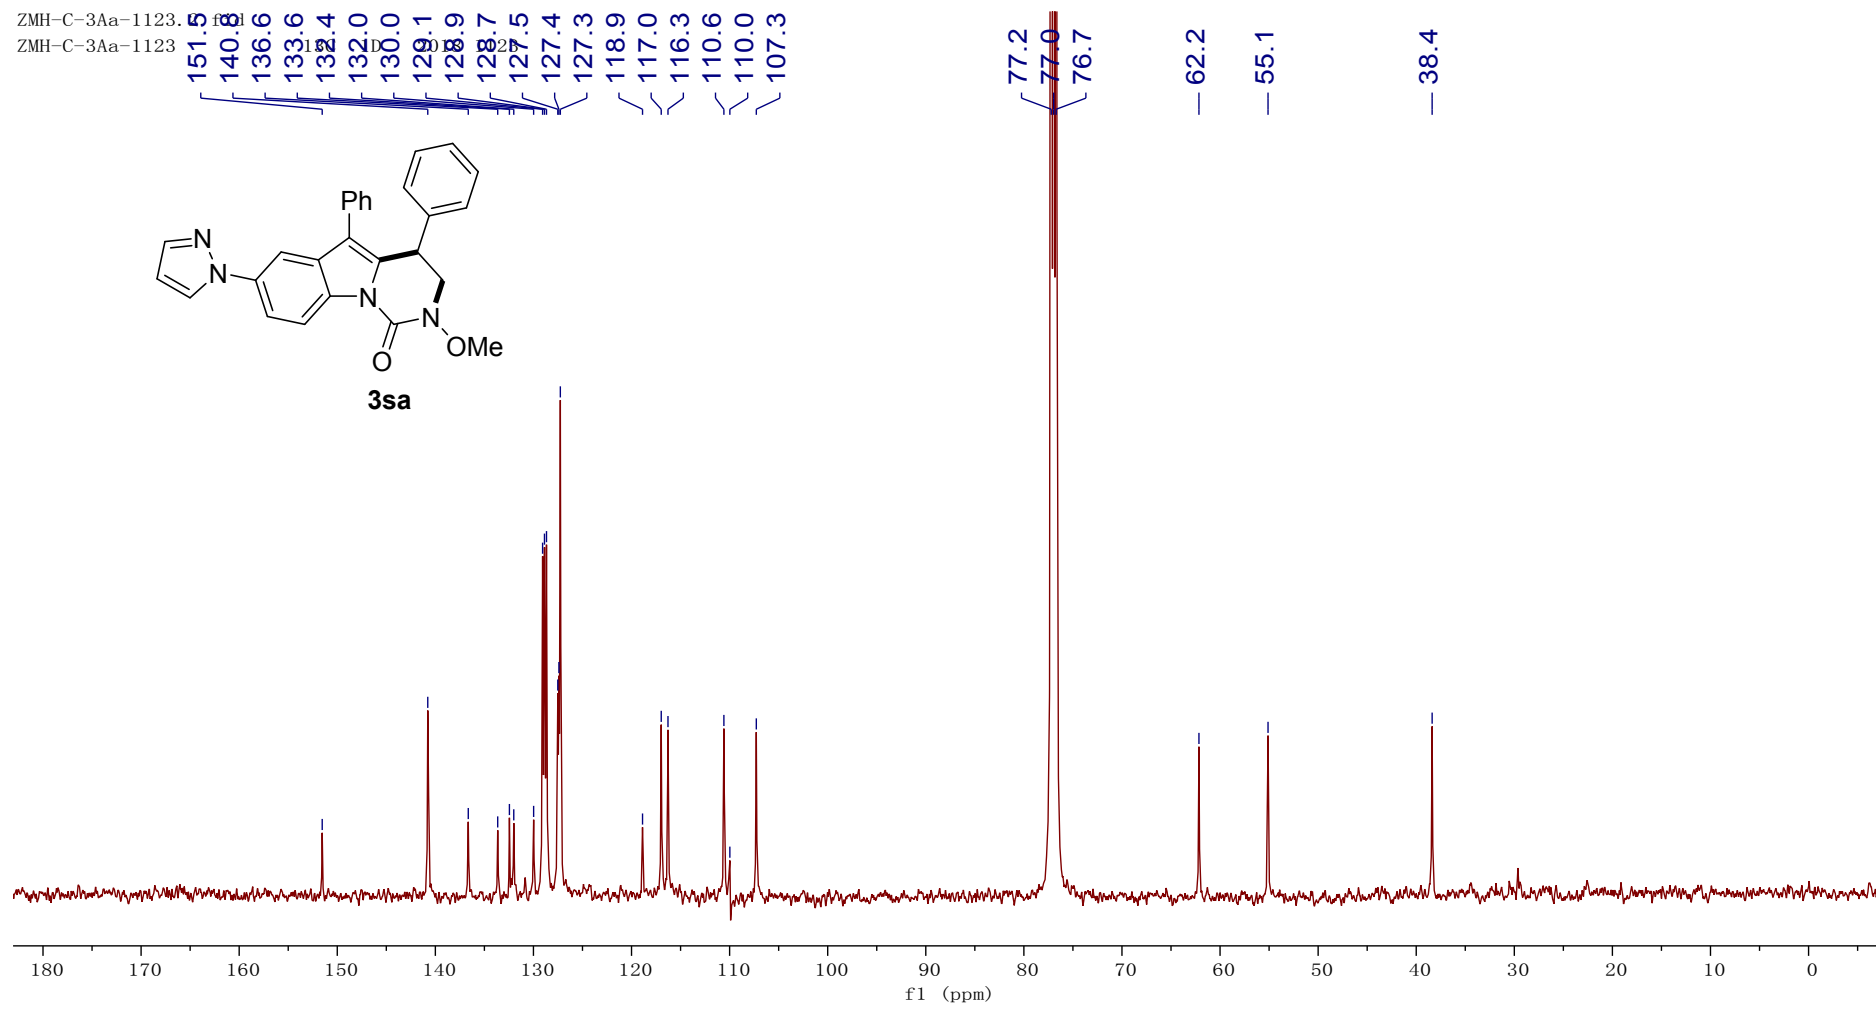

ZMH-20190319A.1.fid  
ZMH-20190319A 1H 1D 2019 0321

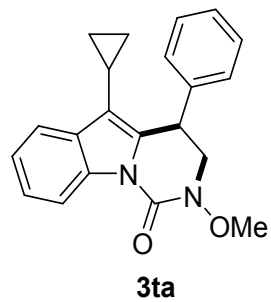

8.50  
8.49  
8.48  
7.68  
7.66  
7.65  
7.40  
7.38  
7.37  
7.35  
7.34  
7.32  
7.30  
7.29  
7.20  
7.19

4.76  
4.21  
4.20  
4.19  
4.18  
4.17  
3.83  
3.82  
3.81  
3.80  
3.64

1.54  
1.53  
0.79  
0.77  
0.76  
0.75  
0.57  
0.56

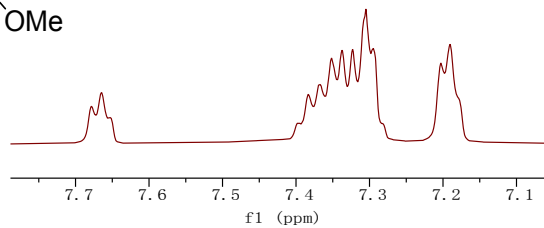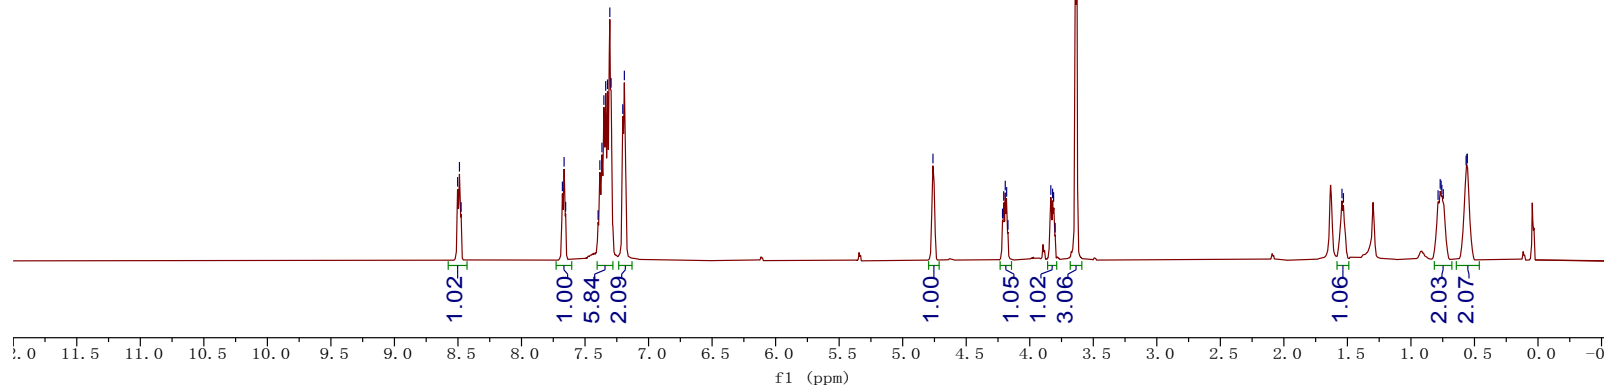



ZMH-20190319A.2.fid

ZMH-20190319A

13C 200 0.34

153.3  
140.5  
134.9  
132.6  
130.6  
128.7  
127.5  
127.4  
124.3  
122.9  
119.2  
117.7  
115.7

77.3  
77.0  
76.7

62.3

55.1

38.7

5.4  
4.9  
4.5

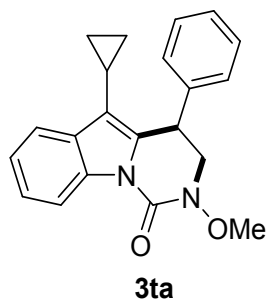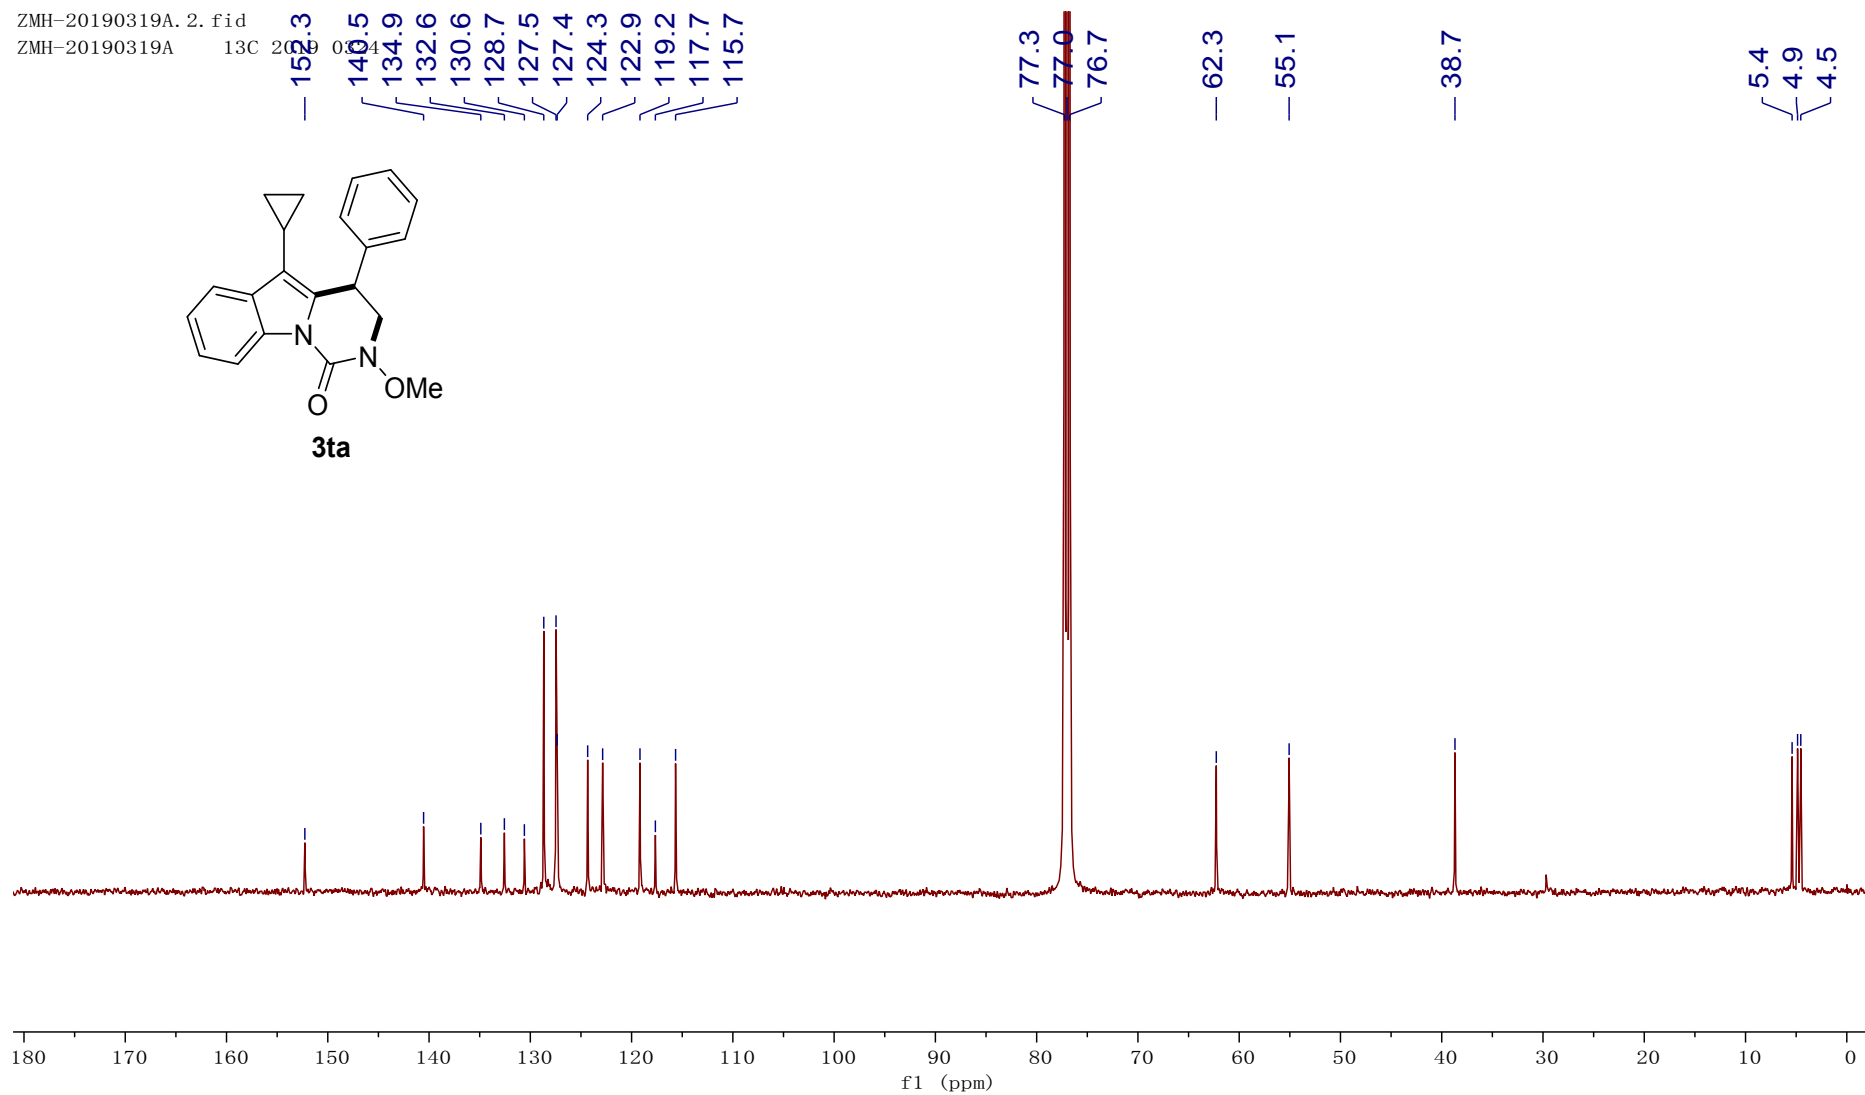



DWB-191018-X.2.fid  
DWB-191018-X 13C 191023

162.86  
140.47  
140.05  
128.74  
128.22  
127.52  
125.42  
125.02  
123.54  
121.25  
120.97  
120.27  
110.30  
100.00

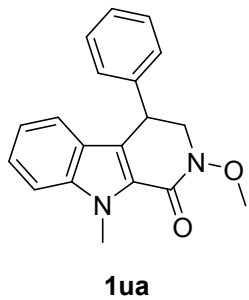

77.28 CD  
77.02 CD  
76.77 CD

62.42  
57.81

39.87  
31.41

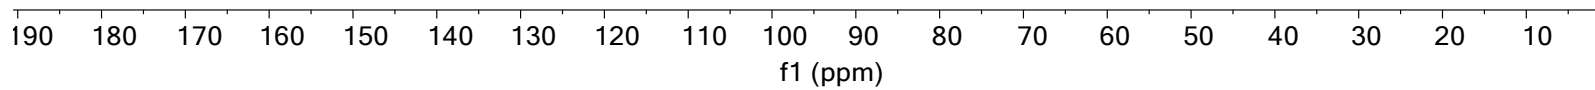



DWB-191018-S. 2. fid  
DWB-191018-S 13C 198.23

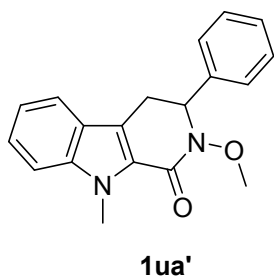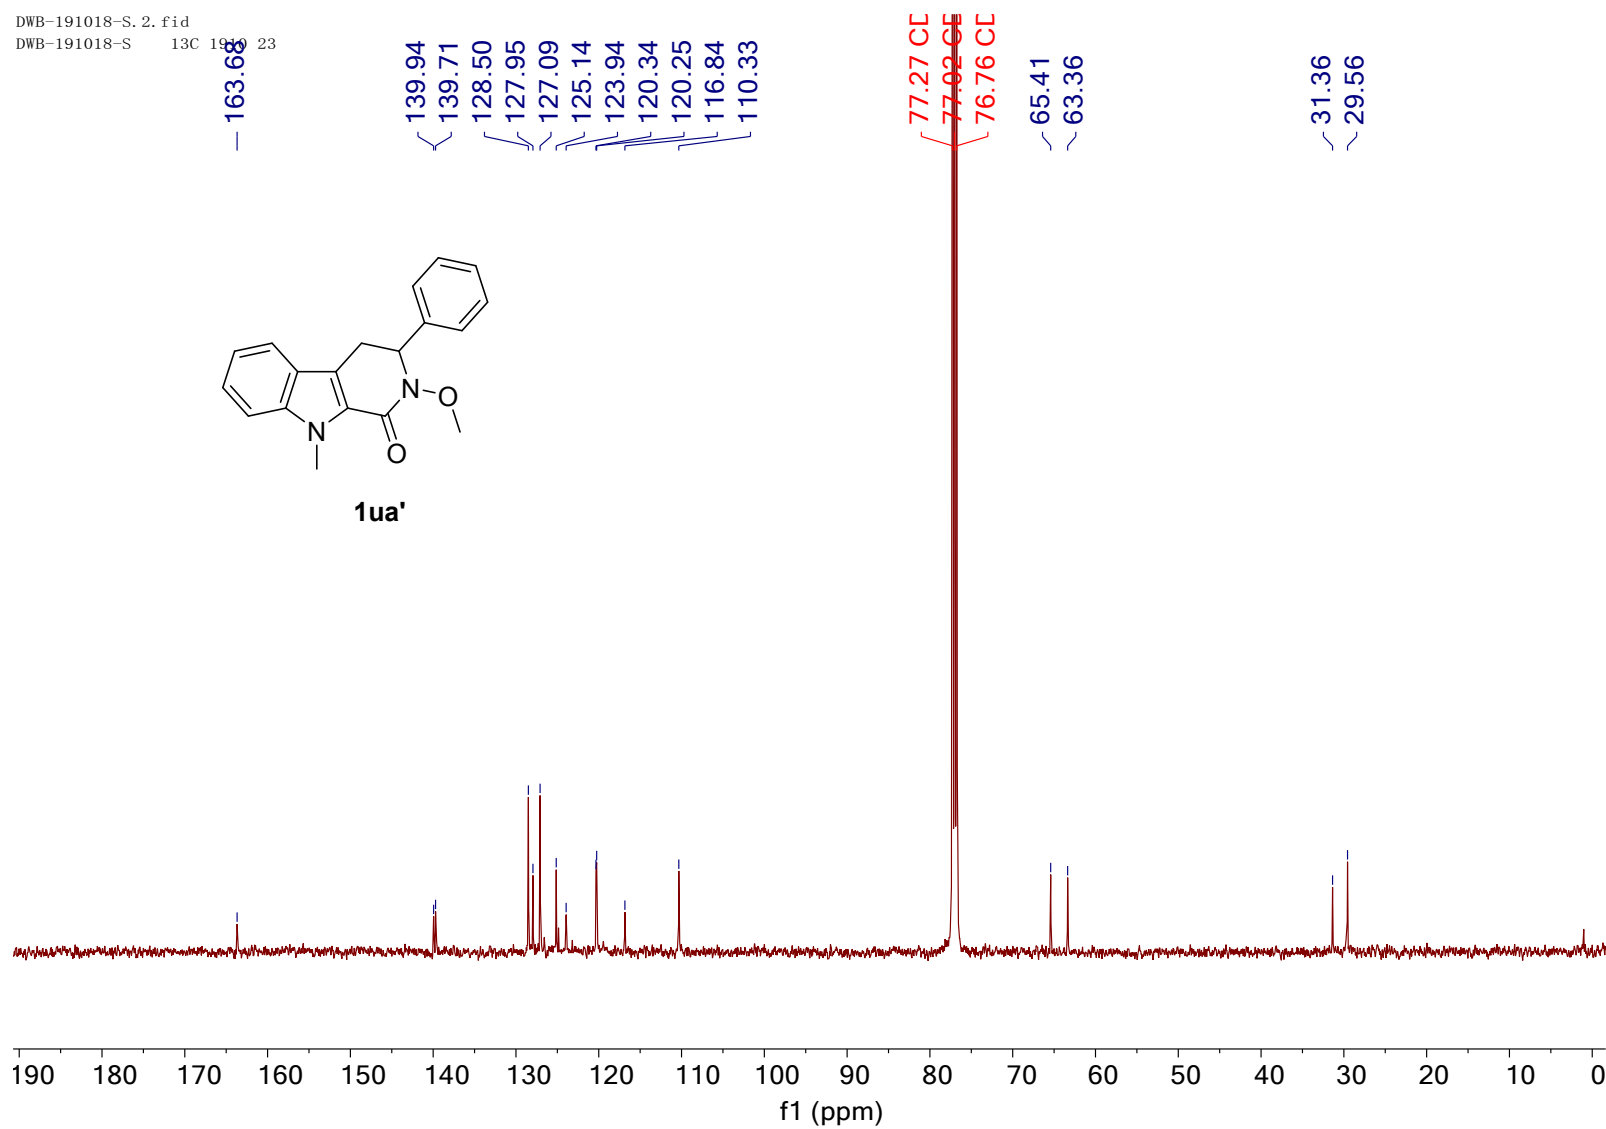





DWB-191023. 2. fid  
DWB-191023 13C 99191025

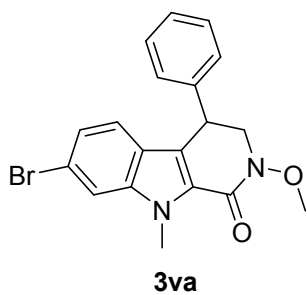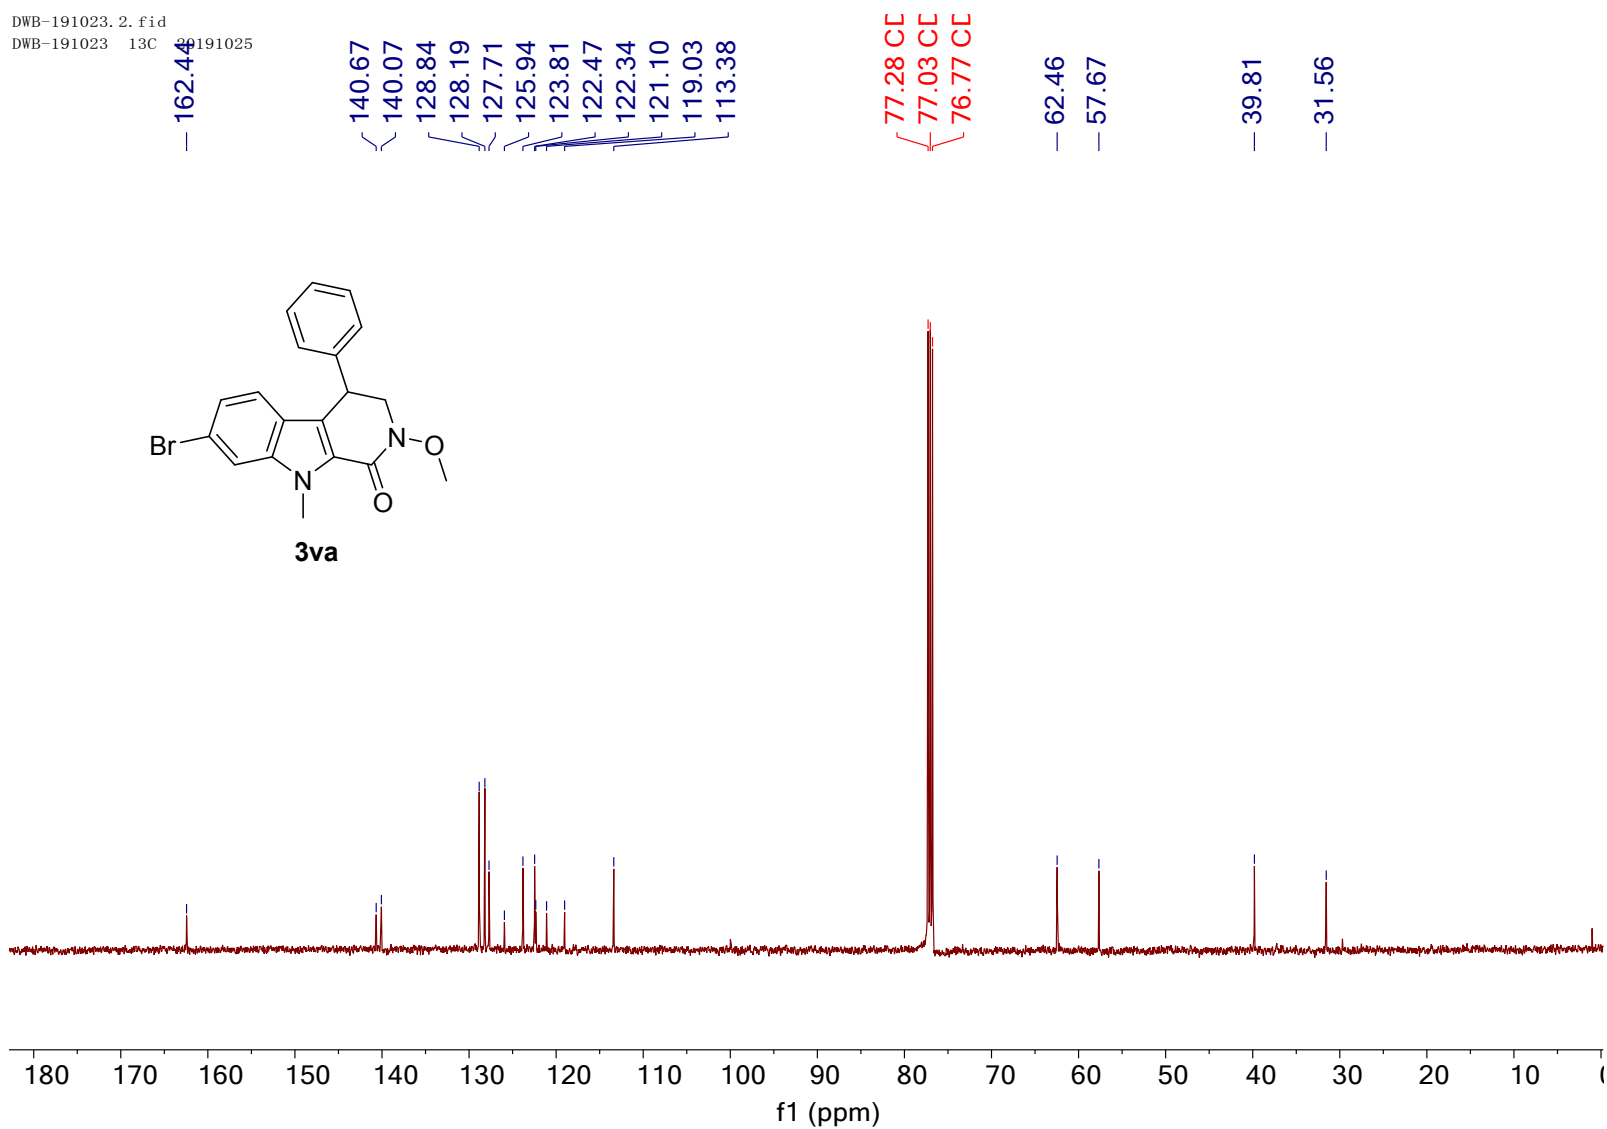

ZMH-A-4AA. 1. fid  
ZMH-A-4AA

1H 1D 2018 11

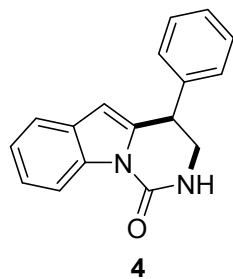

8.40  
7.47  
7.45  
7.40  
7.39  
7.38  
7.36  
7.35  
7.34  
7.32  
7.30  
7.26  
7.23  
7.22  
7.20  
— 6.10  
— 4.43  
— 3.67

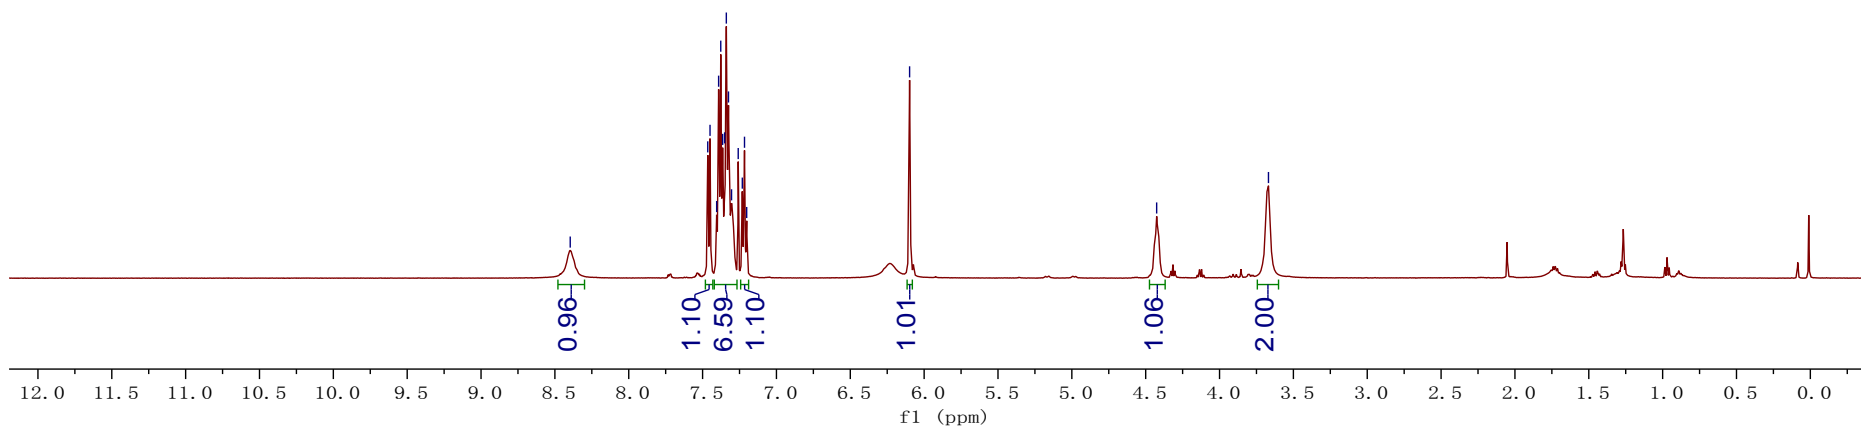

ZMH-A-4AA. 2. fid  
ZMH-A-4AA

136.6  
135.3  
135.4  
129.0  
128.8  
128.4  
127.8  
123.9  
122.8  
120.1  
115.2  
— 104.8

77.2  
77.0  
76.7

— 46.5

— 40.7

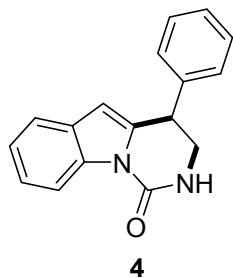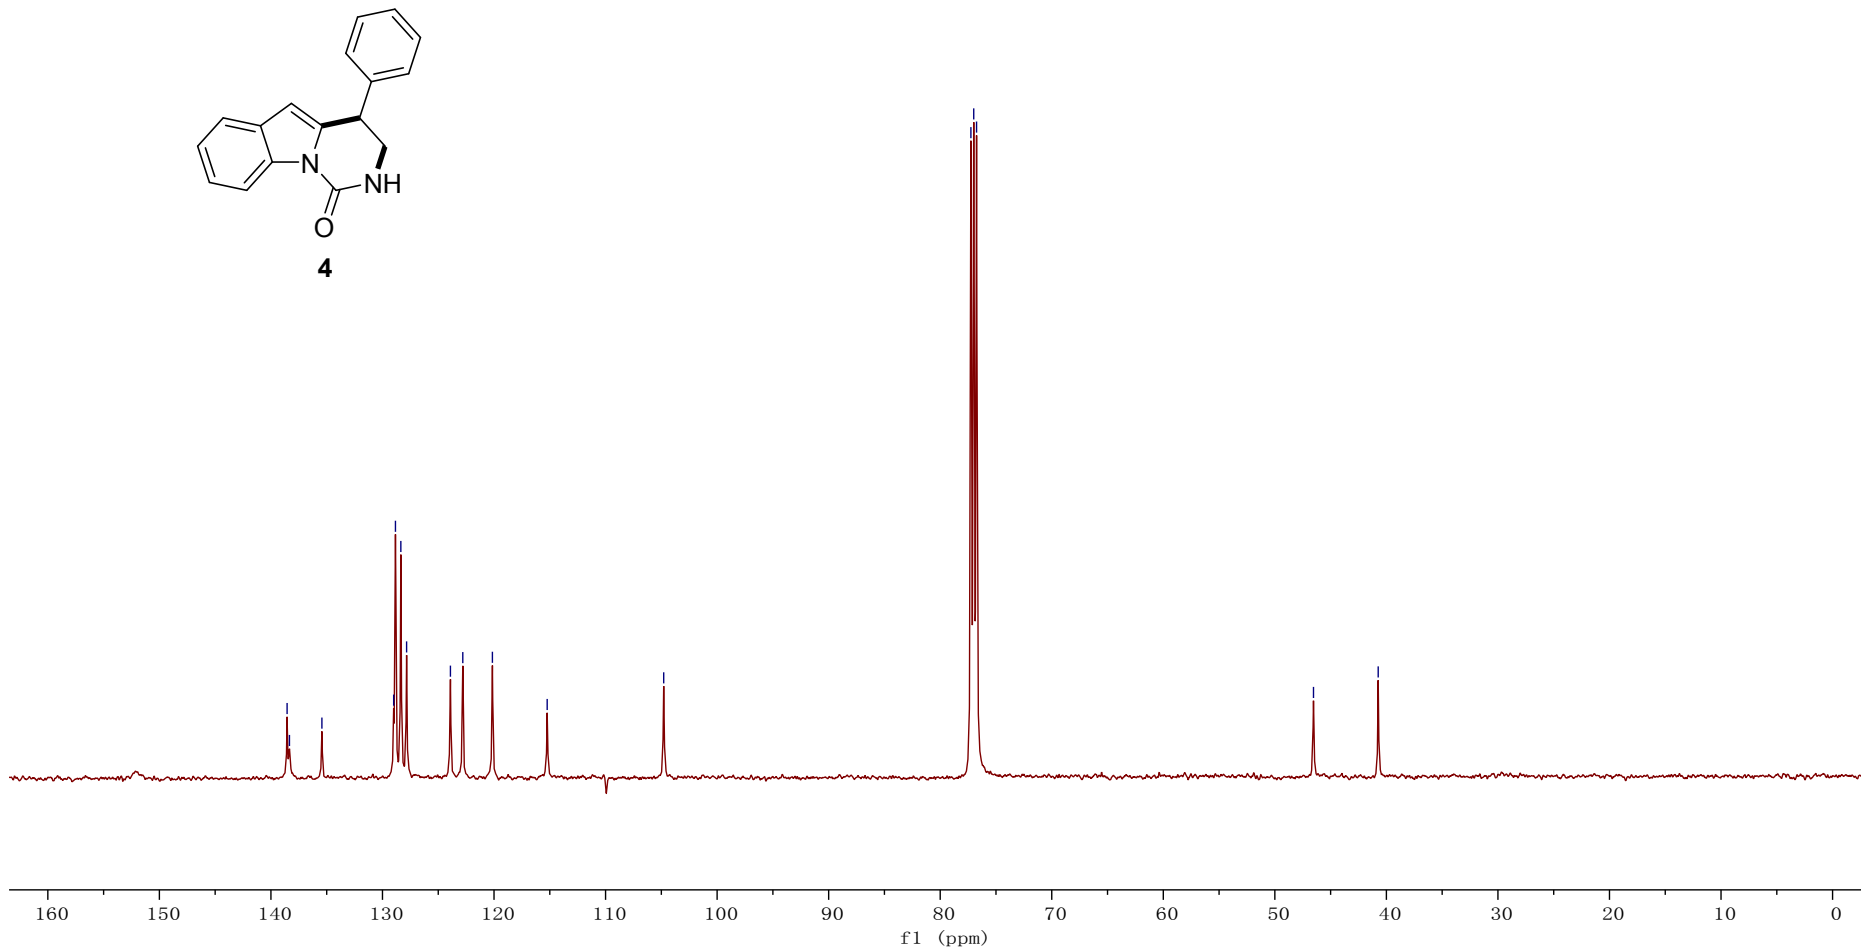

## References

- [1] W. J. Kong, X. C. Chen, M. M. Wang, H. X. Dai and J.Q. Yu, *Org. Lett.* 2018, **20**, 284-287.
- [2] (a) J. Mo, T. Muller, J. C. A. Oliveira, S. Demeshko, F. Meyer and L. Ackermann, *Angew. Chem. Int. Ed.*, 2019, **58**, 12874 –12878; (b) Y. Aihara and N. Chatani, *Chem. Sci.*, 2013, **4**, 664–670; (c) A. Rana, M. E. Cinar, D. Samanta and M. Schmittel, *Org. Lett.* 2016, **18**, 84–87.
- 
- <sup>i</sup> J. D. Chai and M. Head-Gordon, *Phys. Chem. Chem. Phys.* **2008**, *10*, 6615.
- <sup>ii</sup> M. J. Frisch, G. W. Trucks, H. B. Schlegel, G. E. Scuseria, M. A. Robb, J. R. Cheeseman, G. Scalmani, V. Barone, B. Mennucci, G. A. Petersson, H. Nakatsuji, M. Caricato, X. Li, H. P. Hratchian, A. F. Izmaylov, J. Bloino, G. Zheng, J. L. Sonnenberg, M. Hada, M. Ehara, K. Toyota, R. Fukuda, J. Hasegawa, M. Ishida, T. Nakajima, Y. Honda, O. Kitao, H. Nakai, T. Vreven, J. A. Montgomery, Jr., J. E. Peralta, F. Ogliaro, M. Bearpark, J. J. Heyd, E. Brothers, K. N. Kudin, V. N. Staroverov, R. Kobayashi, J. Normand, K. Raghavachari, A. Rendell, J. C. Burant, S. S. Iyengar, J. Tomasi, M. Cossi, N. Rega, J. M. Millam, M. Klene, J. E. Knox, J. B. Cross, V. Bakken, C. Adamo, J. Jaramillo, R. Gomperts, R. E. Stratmann, O. Yazyev, A. J. Austin, R. Cammi, C. Pomelli, J. W. Ochterski, R. L. Martin, K. Morokuma, V. G. Zakrzewski, G. A. Voth, P. Salvador, J. J. Dannenberg, S. Dapprich, A. D. Daniels, Ö. Farkas, J. B. Foresman, J. V. Ortiz, J. Cioslowski, D. J. Fox, Gaussian 09, Rev. D.01; Gaussian, Inc.: Wallingford, CT, **2013**.
- <sup>iii</sup> P. J. Hay and W. R. Wadt, *J. Chem. Phys.* **1985**, *82*, 270.
- <sup>iv</sup> W. R. Wadt and P. J. Hay, *J. Chem. Phys.* **1985**, *82*, 284.
- <sup>v</sup> P. J. Hay and W. R. Wadt, *J. Chem. Phys.* **1985**, *82*, 299.
- <sup>vi</sup> C. E. Check, T. O. Faust, J. M. Bailey, B. J. Wright, T. M. Gilbert and L. S. Sunderlin, *J. Phys. Chem. A* **2001**, *105*, 8111.

- 
- vii A. W. Ehlers, M. Böhme, S. Dapprich, A. Gobbi, A. Höllwarth, V. Jonas, K. F. Köhler, R. Stegmann, A. Veldkamp and G. Frenking, *Chem. Phys. Lett.* **1993**, *208*, 111.
- viii A. Höllwarth, M. Böhme, S. Dapprich, A. W. Ehlers, A. G. Obbi, V. Jonas, K. F. Köhler, R. Stegmann, A. Veldkamp and G. Frenking, *Chem. Phys. Lett.* **1993**, *208*, 237.
- ix P. C. Hariharan and J. A. Pople, *Theor. Chim. Acta* **1973**, *28*, 213.
- x M. S. Gordon, *Chem. Phys. Lett.* **1980**, *76*, 163.
- xi R. C. J. Binning and L. A. Curtiss, *J. Comput. Chem.* **1990**, *11*, 1206.
- xii K. Fukui, *J. Phys. Chem.* **1970**, *74*, 4161.
- xiii K. Fukui, *Acc. Chem. Res.* **1981**, *14*, 363.
- xiv (a) G. Y. Yin, I. Kalvet, U. Englert and F. Schoenebeck, *J. Am. Chem. Soc.* **2015**, *137*, 4164. (b) G. Jindal and R. B. Sunoj, *J. Am. Chem. Soc.* **2014**, *136*, 15998. (c) Q. Q. Lu, H. Z. Yu and Y. Fu, *J. Am. Chem. Soc.* **2014**, *136*, 8252. (d) A. Fromm, C. V. Wüllen, D. Hackenberger and L. J. Gooßen, *J. Am. Chem. Soc.* **2014**, *136*, 10007. (e) G. J. Cheng, Y. F. Yang, P. Liu, P. Chen, T. Y. Sun, G. Li, X. H. Zhang, K. N. Houk, J. Q. Yu and Y. D. Wu, *J. Am. Chem. Soc.* **2014**, *136*, 894. (f) P. Liu, L. E. Sirois, P. H. Y. Cheong, Z. X. Yu, I. V. Hartung, H. Rieck, P. A. Wender and K. N. Houk, *J. Am. Chem. Soc.* **2010**, *132*, 10127. (g) S. F. Ni, L. Dang, *Phys. Chem. Chem. Phys.* **2016**, *18*, 4860. (h) S. F. Ni, T. L. Yang, L. Dang, *Organometallics*, **2017**, *36*, 2746. (i) L. B. Zhang, M. H. Zhu, S. F. Ni, L. R. Wen, M. Li, *ACS Catal.* **2019**, *9*, 1680.
- xv (a) J. D. Cox, D. D. Wagman, V.A. Medvedev, CODATA Key Values for Thermodynamics, Hemisphere Publishing Corp., New York, **1984**, 1. (b) P. Xiao, H. Y. Yuan, J. Q. Liu, Y. Y. Zheng, X. H. Bi, and J. P. Zhang, *ACS Catal.* **2015**, *5*, 6177. (c) J. Daru, Z. Benda, Á. Póti, Z. Novák, and A. Stirling, *Chem. Eur. J.* **2014**, *20*, 15395.
